# Supplementary material for: RECKLEEN: a lambda Red/CRISPR-Cas9 based single plasmid platform for fast, efficient, markerless, and scarless genome editing in Klebsiella pneumoniae
Source: Research Square preprint supplement (doi:10.21203/rs.3.rs-5859838/v1), 2025-02-28
Supplement: Supplementary file 1 [file Supplementary tables.xlsx]

## Sheet: Supplementary Table 1
Supplementary Table 1: Assembly of plasmids used in this study. Parts were assembled in the framework of the Marburg Collection.
Plasmid	Description
RECKLEEN_1	Level 2 RECKLEEN plasmid, (Ptac lambda Red operon, Ptet cas9, J23117 acrIIA4, Ptet sfgfp dropout sgRNA), pMB1 origin of replication, and apramycin resistance marker (aac(3)-IV).
RECKLEEN_2	Level 2 RECKLEEN plasmid, (Ptac lambda Red operon, Ptet SpG cas9, J23117 acrIIA4, Ptet sfgfp dropout sgRNA), pMB1 origin of replication, and apramycin resistance marker (aac(3)-IV).
RECKLEEN_3	Level 2 RECKLEEN plasmid, (Ptac lambda Red operon, Ptet SpG cas9, J23117 acrIIA4, sfgfp dropout for multitarget editing in positions 4 and 5 using RECKLEEN_3plus_sgRNA helper plasmids, pMB1 origin of replication, and apramycin resistance marker (aac(3)-IV).
Reckleen_3plus_sgRNA_ptet_pos4	Level 1 part, Ptet sfgfp dropout sgRNA for position 4, for building RECKLEEN plasmid with multiple sgRNAs, ColE1 origin of replication, and Kanamycin resistance marker.
Reckleen_3plus_sgRNA_ptet_pos5	Level 1 part, Ptet sfgfp dropout sgRNA for position 5, for building RECKLEEN plasmid with multiple sgRNAs, ColE1 origin of replication, and Kanamycin resistance marker.
Reckleen_3plus_sgRNA_ptet_pos5a	Level 1 part, Ptet sfgfp dropout sgRNA for position 5a, for building RECKLEEN plasmid with multiple sgRNAs, ColE1 origin of replication, and Kanamycin resistance marker.
Reckleen_3plus_sgRNA_ptet_pos5a1	Level 1 part, Ptet sfgfp dropout sgRNA for position 5a1, for building RECKLEEN plasmid with multiple sgRNAs, ColE1 origin of replication, and Kanamycin resistance marker.
Reckleen_3plus_sgRNA_ptet_pos5a2	Level 1 part, Ptet sfgfp dropout sgRNA for position 5a2, for building RECKLEEN plasmid with multiple sgRNAs, ColE1 origin of replication, and Kanamycin resistance marker.
Reckleen_3plus_sgRNA_ptet_pos5b	Level 1 part, Ptet sfgfp dropout sgRNA for position 5b, for building RECKLEEN plasmid with multiple sgRNAs, ColE1 origin of replication, and Kanamycin resistance marker.
Reckleen_3plus_sgRNA_ptet_pos5b1	Level 1 part, Ptet sfgfp dropout sgRNA for position 5b1, for building RECKLEEN plasmid with multiple sgRNAs, ColE1 origin of replication, and Kanamycin resistance marker.
Reckleen_3plus_sgRNA_ptet_pos5b2	Level 1 part, Ptet sfgfp dropout sgRNA for position 5b2, for building RECKLEEN plasmid with multiple sgRNAs, ColE1 origin of replication, and Kanamycin resistance marker.
RECKLEEEN 1_control sgRNA_1	Level 2_RECKLEEN 1 with control sgRNA_1
RECKLEEEN 1_control sgRNA_2	Level 2_RECKLEEN 1 with control sgRNA_2
RECKLEEEN 1_wzi_deletion_1	Level 2_RECKLEEN 1 with wzi_sgRNA_deletion_1
RECKLEEEN 1_wzi_deletion_2	Level 2_RECKLEEN 1 with wzi_sgRNA_deletion_2
RECKLEEEN 1_araA_deletion	Level 2_RECKLEEN 1 with araA_sgRNA_deletion
RECKLEEEN 1_scrK_deletion	Level 2_RECKLEEN 1 with scrK_sgRNA_deletion
RECKLEEEN 1_glpK_deletion	Level 2_RECKLEEN 1 with glpK_sgRNA_deletion
RECKLEEEN 1_dhaK_deletion	Level 2_RECKLEEN 1 with dhaK_sgRNA_deletion
RECKLEEEN 2_wzi (PAM = NGA)	Level 2_RECKLEEN 2 with wzi_sgRNA_NGA_1
RECKLEEEN 2_wzi (PAM = NGA)	Level 2_RECKLEEN 2 with wzi_sgRNA_NGA_2
RECKLEEEN 2_wzi (PAM = NGT)	Level 2_RECKLEEN 2 with wzi_sgRNA_NGT_1
RECKLEEEN 2_wzi (PAM = NGT)	Level 2_RECKLEEN 2 with wzi_sgRNA_NGT_2
RECKLEEEN 2_wzi (PAM = NGC)	Level 2_RECKLEEN 2 with wzi_sgRNA_NGC_1
RECKLEEEN 2_wzi (PAM = NGC)	Level 2_RECKLEEN 2 with wzi_sgRNA_NGC_2
RECKLEEEN 2_wzi (point mutation)	Level 2_RECKLEEN 2 with wzi_sgRNA_pointmutation
RECKLEEEN 2_scrK (point mutation)	Level 2_RECKLEEN 2 with scrK_sgRNA_pointmutation
RECKLEEEN 2_araA (point mutation)	Level 2_RECKLEEN 2 with araA_sgRNA_pointmutation
RECKLEEEN 2_malQ (point mutation)	Level 2_RECKLEEN 2 with malQ_sgRNA_pointmutation
RECKLEEEN 2_rpsB_integration	Level 2_RECKLEEN 2 with rpsB_sgRNA_integration
RECKLEEEN 2_rplS_integration	Level 2_RECKLEEN 2 with rplS_sgRNA_integration
RECKLEEEN 2_rpoS_integration	Level 2_RECKLEEN 2 with rpoS_sgRNA_integration
RECKLEEN 3_multideletion_araA_scrK	Level 2_RECKLEEN 3 with 2 sgRNA_araA and scrK
RECKLEEN 3_multideletion_araA_scrK_dhaK	Level 2_RECKLEEN 3 with 3 sgRNA_araA, scrK and dhak
pES_07	Level 0*, contains pMB1 origin of replication, aac3(IV) apramycin resistance
pES_04	Level 1, Ptac lambda Red operon (gam, exo, beta)
pES_105	Level 1, Ptet cas9
pES_193	Level 1, Ptet SpG cas9
pES_103	Level 1, Ptet sgRNA position 4
pES_104	Level 1, J23106 acrIIA4
pES_106	Level 1, J23114 acrIIA4
pES_107	Level 1, J23105 acrIIA4
pES_108	Level 1, J23117 acrIIA4
pES_114	Level 2 Dropout plasmid, contains pMB1 origin of replication, aac3(IV) apramycin resistance, Ptac lambda Red operon and mScarlet-I dropout for remaining positions
PreRECKLEEN_acrIIA4_J23106	Level 2 RECKLEEN plasmid, (Ptac lambda Red operon, Ptet cas9, J23106 acrIIA4, Ptet sfgfp dropout sgRNA), pMB1 origin of replication, and apramycin resistance marker (aac(3)-IV).
PreRECKLEEN_acrIIA4_J23114	Level 2 RECKLEEN plasmid, (Ptac lambda Red operon, Ptet cas9, J23114 acrIIA4, Ptet sfgfp dropout sgRNA), pMB1 origin of replication, and apramycin resistance marker (aac(3)-IV).
PreRECKLEEN_acrIIA4_J23105	Level 2 RECKLEEN plasmid, (Ptac lambda Red operon, Ptet cas9, J23105 acrIIA4, Ptet sfgfp dropout sgRNA), pMB1 origin of replication, and apramycin resistance marker (aac(3)-IV).

## Sheet: Supplementary Table 2
Supplementary Table 2: Bacterial strains used in this study.
Strain	Description
E. coli Dh5α	F− Φ80lacZΔM15 Δ(lacZYA-argF)U169 recA1 endA1 hsdR17(rK−, mK+) phoA supE44 λ− thi-1 gyrA96 relA1
E. coli NEB turbo	F' proA+B+ lacIq ∆lacZM15 / fhuA2 ∆(lac-proAB) glnV galK16 galE15 R(zgb-210::Tn10)TetS endA1 thi-1 ∆(hsdS-mcrB)5
Klebsiella pneumoniae ATCC700721	WT Klebsiella pneumoniae ATCC700721, MGH78578
Klebsiella pneumoniae ATCC700603	WT Klebsiella pneumoniae ATCC700603
Klebsiella pneumoniae BAA1705	WT Klebsiella pneumoniae BAA1705
Klebsiella pneumoniae_PreRECKLEEN_ACRIIA4_J23106	Klebsiella pneumoniae ATCC700721 electroporated with PreRECKLEEN_ACRIIA4_J23106
Klebsiella pneumoniae_PreRECKLEEN_ACRIIA4_J23114	Klebsiella pneumoniae ATCC700721 electroporated with PreRECKLEEN_ACRIIA4_J23114
Klebsiella pneumoniae_PreRECKLEEN_ACRIIA4_J23105	Klebsiella pneumoniae ATCC700721 electroporated with PreRECKLEEN_ACRIIA4_J23105
Klebsiella pneumoniae_RECKLEEN_1	Klebsiella pneumoniae ATCC700721 electroporated with RECKLEEN_1
Klebsiella pneumoniae_RECKLEEN_2	Klebsiella pneumoniae ATCC700721 electroporated with RECKLEEN_2
Klebsiella pneumoniae_RECKLEEN_3	Klebsiella pneumoniae ATCC700721 electroporated with RECKLEEN_3
Klebsiella pneumoniae_RECKLEEEN 1_control gRNA_1	Klebsiella pneumoniae ATCC700721 electroporated with RECKLEEN_1 with control gRNA_1
Klebsiella pneumoniae_RECKLEEEN 1_control gRNA_2	Klebsiella pneumoniae ATCC700721 electroporated with RECKLEEN_1 with control gRNA_2
Klebsiella pneumoniae_RECKLEEEN 1_wzi_deletion_1	Klebsiella pneumoniae ATCC700721 electroporated with RECKLEEN 1 with wzi gRNA_deletion_1
Klebsiella pneumoniae_RECKLEEEN 1_wzi_deletion_2	Klebsiella pneumoniae ATCC700721 electroporated with RECKLEEN 1 with wzi gRNA_deletion_2
Klebsiella pneumoniae_RECKLEEEN 1_araA_deletion	Klebsiella pneumoniae ATCC700721 electroporated with RECKLEEN 1 with araA_gRNA_deletion
Klebsiella pneumoniae_RECKLEEEN 1_scrK_deletion	Klebsiella pneumoniae ATCC700721 electroporated with RECKLEEN 1 with scrK_gRNA_deletion
Klebsiella pneumoniae_RECKLEEEN 1_glpK_deletion	Klebsiella pneumoniae ATCC700721 electroporated with RECKLEEN 1 with glpK_gRNA_deletion
Klebsiella pneumoniae_RECKLEEEN 1_dhaK_deletion	Klebsiella pneumoniae ATCC700721 electroporated with RECKLEEN 1 with dhaK_gRNA_deletion
Klebsiella pneumoniae_RECKLEEEN 2_wzi (PAM = NGA)	Klebsiella pneumoniae ATCC700721 electroporated with RECKLEEN 2 with wzi_gRNA_NGA_1
Klebsiella pneumoniae_RECKLEEEN 2_wzi (PAM = NGA)	Klebsiella pneumoniae ATCC700721 electroporated with RECKLEEN 2 with wzi_gRNA_NGA_2
Klebsiella pneumoniae_RECKLEEEN 2_wzi (PAM = NGT)	Klebsiella pneumoniae ATCC700721 electroporated with RECKLEEN 2 with wzi_gRNA_NGT_1
Klebsiella pneumoniae_RECKLEEEN 2_wzi (PAM = NGT)	Klebsiella pneumoniae ATCC700721 electroporated with RECKLEEN 2 with wzi_gRNA_NGT_2
Klebsiella pneumoniae_RECKLEEEN 2_wzi (PAM = NGC)	Klebsiella pneumoniae ATCC700721 electroporated with RECKLEEN 2 with wzi_gRNA_NGC_1
Klebsiella pneumoniae_RECKLEEEN 2_wzi (PAM = NGC)	Klebsiella pneumoniae ATCC700721 electroporated with RECKLEEN 2 with wzi_gRNA_NGC_2
Klebsiella pneumoniae_RECKLEEEN 2_wzi (point mutation)	Klebsiella pneumoniae ATCC700721 electroporated with RECKLEEN 2 with wzi_gRNA_pointmutation
Klebsiella pneumoniae_RECKLEEEN 2_scrK (point mutation)	Klebsiella pneumoniae ATCC700721 electroporated with RECKLEEN 2 with scrK_gRNA_pointmutation
Klebsiella pneumoniae_RECKLEEEN 2_araA (point mutation)	Klebsiella pneumoniae ATCC700721 electroporated with RECKLEEN 2 with araA_gRNA_pointmutation
Klebsiella pneumoniae_RECKLEEEN 2_malQ (point mutation)	Klebsiella pneumoniae ATCC700721 electroporated with RECKLEEN 2 with malQ_gRNA_pointmutation
Klebsiella pneumoniae_RECKLEEEN 2_rpsB_integration	Klebsiella pneumoniae ATCC700721 electroporated with RECKLEEN 2 with rpsB_gRNA_integration
Klebsiella pneumoniae_RECKLEEEN 2_rplS_integration	Klebsiella pneumoniae ATCC700721 electroporated with RECKLEEN 2 with rplS_gRNA_integration
Klebsiella pneumoniae_RECKLEEEN 2_rpoS_integration	Klebsiella pneumoniae ATCC700721 electroporated with RECKLEEN 2 with rpoS_gRNA_integration
Klebsiella pneumoniae_RECKLEEN 3_multideletion_AraA_scrK	Klebsiella pneumoniae ATCC700721 electroporated with RECKLEEN 3 with 2 gRNA_AraA and scrK
Klebsiella pneumoniae_RECKLEEN 3_multideletion_AraA_scrK_dhaK	Klebsiella pneumoniae ATCC700721 electroporated with RECKLEEN 3 with 23 gRNA_AraA, scrK and dhak
Klebsiella pneumoniae_RECKLEEEN 2_araA (point mutation)	Klebsiella pneumoniae ATCC700721 electroporated with RECKLEEN 2 with araA_gRNA_pointmutation
Klebsiella pneumoniae_RECKLEEEN 2_malQ (point mutation)	Klebsiella pneumoniae ATCC700721 electroporated with RECKLEEN 2 with malQ_gRNA_pointmutation
Klebsiella pneumoniae_RECKLEEEN 2_rpsB_integration	Klebsiella pneumoniae ATCC700721 electroporated with RECKLEEN 2 with rpsB_gRNA_integration
Klebsiella pneumoniae_RECKLEEEN 2_rplS_integration	Klebsiella pneumoniae ATCC700721 electroporated with RECKLEEN 2 with rplS_gRNA_integration
Klebsiella pneumoniae_RECKLEEEN 2_rpoS_integration	Klebsiella pneumoniae ATCC700721 electroporated with RECKLEEN 2 with rpoS_gRNA_integration
Klebsiella pneumoniae_RECKLEEN 3_multideletion_araA_scrK	Klebsiella pneumoniae ATCC700721 electroporated with RECKLEEN 3 with 2 gRNA_araA and scrK
Klebsiella pneumoniae_RECKLEEN 3_multideletion_araA_scrK_dhaK	Klebsiella pneumoniae ATCC700721 electroporated with RECKLEEN 3 with 3 gRNA_araA, scrK and dhak
Klebsiella pneumoniae ATCC700721_Δ wzi	Klebsiella pneumoniae ATCC700721 with deletion of wzi
Klebsiella pneumoniae ATCC700603_Δ wzi	Klebsiella pneumoniae ATCC700603 with deletion of wzi
Klebsiella pneumoniae ATCC BAA 1705_Δ wzi	Klebsiella pneumoniae ATCC BAA1705 with deletion of wzi
Klebsiella pneumoniae ATCC700721_Δ araA	Klebsiella pneumoniae ATCC700721 with deletion of araA
Klebsiella pneumoniae ATCC700721_Δ scrK	Klebsiella pneumoniae ATCC700721 with deletion of scrK
Klebsiella pneumoniae ATCC700721_Δ glpK	Klebsiella pneumoniae ATCC700721 with deletion of glpK
Klebsiella pneumoniae ATCC700721_Δ dhak	Klebsiella pneumoniae ATCC700721 with deletion of dhak
Klebsiella pneumoniae ATCC700721_wzi_C66>A	Klebsiella pneumoniae ATCC700721 with point mutation of wzi_C66A
Klebsiella pneumoniae ATCC700721_scrK_T222>A	Klebsiella pneumoniae ATCC700721 with point mutation of scrK_T222A
Klebsiella pneumoniae ATCC700721_araA_C57>A	Klebsiella pneumoniae ATCC700721 with point mutation of araA_C57A
Klebsiella pneumoniae ATCC700721_malQ_T57>A	Klebsiella pneumoniae ATCC700721 with point mutation of malQ_T57A
Klebsiella pneumoniae ATCC700721_rpsB-mScarlet-I	Klebsiella pneumoniae ATCC700721 with integration of mScarlet-I to the 3' end of rpsB
Klebsiella pneumoniae ATCC700721_rplS-mScarlet-I	Klebsiella pneumoniae ATCC700721 with integration of mScarlet-I to the 3' end of rplS
Klebsiella pneumoniae ATCC700721_rpos-mScarlet-I	Klebsiella pneumoniae ATCC700721 with integration of mScarlet-I to the 3' end of rpoS

## Sheet: Supplementary Table 3
Supplementary Table 3: Oligonucleotides used to assemble gRNA sequences. All sequences written as 5’ -> 3’.
Target	gRNA sequence	forward oligonucleotide		reverse oligonucleotide
control gRNA_1	GGATGGCGTGGGACGCGGCG	oES_11_gRNA1_lacz_fw	gtccGGATGGCGTGGGACGCGGCG	oES_12_gRNA1_lacz_rv	aaacCGCCGCGTCCCACGCCATCC
control gRNA_2	ATAAAGAAACTGTTACCCGT	oES_13_gRNA2_lacz_fw	gtccATAAAGAAACTGTTACCCGT	oES_14_gRNA2_lacz_rv	aaacACGGGTAACAGTTTCTTTAT
wzi_deletion_1	GGGTATAGCTGTAATTGGTT	OES_35_gRNA1_wzi_fw	gtccGGGTATAGCTGTAATTGGTT	OES_36_gRNA1_wzi_rv	aaacAACCAATTACAGCTATACCC
wzi_deletion_2	GCGGAGATCTGGTACTGCCA	oES_45_gRNA2_wzi_fw	gtccGCGGAGATCTGGTACTGCCA	oES_46_gRNA2_wzi_rv	aaacTGGCAGTACCAGATCTCCGC
araA_deletion	CTTCCGGGCCGTACAGATGT	oES_188_gRNA1_AraA_fw	gtccCTTCCGGGCCGTACAGATGT	oES_189_gRNA1_AraA_rv	aaacACATCTGTACGGCCCGGAAG
scrK_deletion	AATGTAGTTCAGCAGCGAGC	oES_64_gRNA1_scrK_fw	gtccAATGTAGTTCAGCAGCGAGC	oES_65_gRNA1_scrK_rv	aaacGCTCGCTGCTGAACTACATT
glpK_deletion	CTGGGTCGAACACGACCCGA	oES_77_gRNA1_glpK_fw	gtccCTGGGTCGAACACGACCCGA	oES_76_gRNA1_glpK_rv	aaacTCGGGTCGTGTTCGACCCAG
dhaK_deletion	GTGGAATAACCTCGCCCGTC	oES_81_gRNA1_dhaK_fw	gtccGTGGAATAACCTCGCCCGTC	oES_81_gRNA1_dhaK_rv	aaacGACGGGCGAGGTTATTCCAC
wzi (PAM = NGA)	GCGTAAGCCTGGGCTCCCAG	oES_328_gRNA_wzi_GGA_fw	gtccGCGTAAGCCTGGGCTCCCAG	oES_329_gRNA_wzi_GGA_rv	aaacCTGGGAGCCCAGGCTTACGC
wzi (PAM = NGA)	TCCTGGCTGAGCGGCCAGGT	oES_344_gRNA_wzi_CGA_fw	gtccTCCTGGCTGAGCGGCCAGGT	oES_345_gRNA_wzi_CGA_rv	aaacACCTGGCCGCTCAGCCAGGA
wzi (PAM = NGT)	CGGCTGCGTAAGCCTGGGCT	oES_326_gRNA_wzi_GGT_fw	gtccCGGCTGCGTAAGCCTGGGCT	oES_327_gRNA_wzi_GGT_rv	aaacAGCCCAGGCTTACGCAGCCG
wzi (PAM = NGT)	AATCCGCTTTTAAGGCAGAC	oES_346_gRNA_wzi_AGT_fw	gtccAATCCGCTTTTAAGGCAGAC	oES_347_gRNA_wzi_AGT_rv	aaacGTCTGCCTTAAAAGCGGATT
wzi (PAM = NGC)	TCATTTACCACTAACCCGGC	oES_330_gRNA_wzi_35FW_TGC_fwd	gtccTCATTTACCACTAACCCGGC	oES_331_gRNA_wzi_35FW_TGC_rv	aaacGCCGGGTTAGTGGTAAATGA
wzi (PAM = NGC)	TAGCCGGTGACCCGGAAATC	oES_348_gRNA_wzi_CGC_fw	gtccTAGCCGGTGACCCGGAAATC	oES_349_gRNA_wzi_CGC_rv	aaacGATTTCCGGGTCACCGGCTA
wzi (point mutation)	CGGCTGCGTAAGCCTGGGCT	oES_326_gRNA_wzi_GGT_fw	gtccCGGCTGCGTAAGCCTGGGCT	oES_327_gRNA_wzi_GGT_rv	aaacAGCCCAGGCTTACGCAGCCG
scrK (point mutation)	TAGACTTTATTGACCACCCC	oES_342_gRNApoint_scrK_GGT_fw	gtccTAGACTTTATTGACCACCCC	oES_343_gRNApoint_scrK_GGT_rv	aaacGGGGTGGTCAATAAAGTCTA
araA (point mutation)	TTCCGGGCCGTACAGATGTT	oES_338_gRNApoint_AraA_GGC_fw	gtccTTCCGGGCCGTACAGATGTT	oES_339_gRNApoint_AraA_GGC_rv	aaacAACATCTGTACGGCCCGGAA
malQ (point mutation)	CGTGCGCGTTGATATAGCTG	oES_74_gRNApoint_malQ_GGG_fw	gtccCGTGCGCGTTGATATAGCTG	oES_75_gRNApoint_malQ_GGG_rv	aaacCAGCTATATCAACGCGCACG
rpsB_integration	TAGAAGCTGAATAATAAGGT	oES_350_gRNA_rpsB_CGA_fw	gtccTAGAAGCTGAATAATAAGGT	oES_351_gRNA_rpsB_CGA_rv	aaacACCTTATTATTCAGCTTCTA
rplS_integration	AAAGCGAATCTTAGTTAAGA	oES_352_gRNA_rplS_CGC_fw	gtccAAAGCGAATCTTAGTTAAGA	oES_353_gRNA_rplS_CGC_rv	aaacTCTTAACTAAGATTCGCTTT
rpoS_integration	GAAAACGTCTTATTCGCGGA	oES_356_gRNA_rpoS_TGT_fw	gtccGAAAACGTCTTATTCGCGGA	oES_357_gRNA_rpoS_TGT_rv	aaacTCCGCGAATAAGACGTTTTC
wzi_deletion_MDR_kp	GCGGAGATCTGGTACTGCCA	oES_45_gRNA2_wzi_fw	gtccGCGGAGATCTGGTACTGCCA	oES_46_gRNA2_wzi_rv	aaacTGGCAGTACCAGATCTCCGC

## Sheet: Supplementary Table 4
Supplementary Table 4: Oligonucleotides used for the construction of dDNA template plasmids. All sequences written as 5’ à 3’.
Plasmid	forward oligonucleotide		reverse oligonucleotide		PCR template
wzi dDNA template	oES_52_wzi_U_fw	TACCAAGTTCTTCAAGCTGCTCGG	oES_53_wzi_U_rv	GGATCTTGTACAGGCTGAATGCTGAAAATAGAGGAG	K. pneumoniae DNA
	oES_31_wzi_D_fw	TCAGCATTCAGCCTGTACAAGATCCATTTTCAGCCCCG	oES_51_wzi_D_rv	AAAGGAACGAGCCGCTGAATAAC	K. pneumoniae DNA
	oES_49_wzi_V_fw	AGGTTATTCAGCGGCTCGTTCCTTTTAGTAGCGGCCGCTGCAGTC	oES_50_wzi_V_rv	CCCGAGCAGCTTGAAGAACTTGGTAGGCCGCGAATTCCAGAAATC	pMC_V_01
rpsB mScarlet-I dDNA template	oES_209_rpsB_U_fw	CTGCAAGCGAAGCGGTAAAAGAC	oES_211_rpsB_U_rv	TCACTGCTTCACCTTTAGAAACCATTTCAGCTTCTACGAAGCTTTCTTCC	K. pneumoniae DNA
	oES_212_rpsB_D_fw	TGGTATGGATGAACTGTACAAATAATAAGGTTTAAGCCCTTATTAGTACCG	oES_210_rpsB_D_rv	GCCGATTTTAGCAACCAGCG	K. pneumoniae DNA
	oES_213_rpsB_V_fw	TGTTGCGCTGGTTGCTAAAATCGGCTAGTAGCGGCCGCTGCAGTC	oES_214_rpsB_V_rv	GCGTCTTTTACCGCTTCGCTTGCAGGGCCGCGAATTCCAGAAATC	pMC_V_01
	oES_5_mScarlet-I_fw	ATGGTTTCTAAAGGTGAAGCAGTG	oES_6_mScarlet-I_rv	TTATTTGTACAGTTCATCCATACCAC	pMC0_4_12_CDSmScarlet-I
rplS mScarlet-I dDNA template	oES_215_rplS_U_fw	GAAGACCTGAACTTCTGGAAAACCTG	oES_216_rplS_U_rv	TCACTGCTTCACCTTTAGAAACCATGTTAAGACGCTCTTTGATACGAGCAG	K. pneumoniae DNA
	oES_217_rplS_D_fw	TGGTATGGATGAACTGTACAAATAAGATTCGCTTTCGCGACATCCT	oES_218_rplS_D_rv	TTAATACCGGGCGAGAAACCG	K. pneumoniae DNA
	oES_219_rplS_V_fw	CTGCCGGTTTCTCGCCCGGTATTAATAGTAGCGGCCGCTGCAGTC	oES_220_rplS_V_rv	AGGTTTTCCAGAAGTTCAGGTCTTCGGCCGCGAATTCCAGAAATC	pMC_V_01
	oES_5_mScarlet-I_fw	ATGGTTTCTAAAGGTGAAGCAGTG	oES_6_mScarlet-I_rv	TTATTTGTACAGTTCATCCATACCAC	pMC0_4_12_CDSmScarlet-I
rpoS mScarlet-I dDNA template	oES_227_rpoS_U_fw	AAACCCGTACGATCCGTTTGC	oES_228_rpoS_U_rv	TCACTGCTTCACCTTTAGAAACCATTTCGCGGAAGAGCGCTTC	K. pneumoniae DNA
	oES_229_rpoS_D_fw	TGGTATGGATGAACTGTACAAATAAGACGTTTTCTGTCAAAAAGGCCC	oES_230_rpoS_D_rv	TAATCGGGCGATTATCCATCGC	K. pneumoniae DNA
	oES_231_rpoS_V_fw	CAGGCGATGGATAATCGCCCGATTATAGTAGCGGCCGCTGCAGTC	oES_232_rpoS_V_rv	ATCGGCAAACGGATCGTACGGGTTTGGCCGCGAATTCCAGAAATC	pMC_V_01
	oES_5_mScarlet-I_fw	ATGGTTTCTAAAGGTGAAGCAGTG	oES_6_mScarlet-I_rv	TTATTTGTACAGTTCATCCATACCAC	pMC0_4_12_CDSmScarlet-I

## Sheet: Supplementary Table 5
Supplementary Table 5: Oligonucleotides to generate dDNA fragments from dDNA template plasmids. All sequences written as 5’ à 3’.
dDNA	forward oligonucleotide		reverse oligonucleotide		PCR template
wzi_1kb/1kb	OES_40_wzi_U_1000_fw	GAGATACCCCTTCAGCATTCCC	OES_43_wzi_D_1000_rv	CCAATGCTGCATGCAGTGAATACG	wzi dDNA template
wzi_500b/500b	OES_41_wzi_U_500_fw	TCGGAGTTAACCCAGTTGCCG	OES_44_wzi_D_500_rv	CCAATTGTGACCGAAATCCCG	wzi dDNA template
wzi_100b/100b	OES_57_wzi_U_100_fw	ACGAGCTTCATTGAGAAATATATACAC	OES_58_wzi_U_100_fw	ATGCAATGACCGCCAGTAATAAG	wzi dDNA template
rpsB-Scarlet-I	oES_209_rpsB_U_fw	CTGCAAGCGAAGCGGTAAAAGAC	oES_211_rpsB_D_rv	GCCGATTTTAGCAACCAGCG	rpsB dDNA template
rplS-mScarlet-I	oES_215_rplS_U_fw	GAAGACCTGAACTTCTGGAAAACCTG	oES_218_rplS_D_rv	TTAATACCGGGCGAGAAACCG	rplS dDNA template
rpoS-mScarlet-I	oES_227_rpoS_U_fw	AAACCCGTACGATCCGTTTGC	oES_230_rpoS_D_rv	TAATCGGGCGATTATCCATCGC	rpoS dDNA template

## Sheet: Supplementary Table 6
Supplementary Table 6: ssDNA Oligonucleotides to generate dDNA fragments. All sequences written as 5’ à 3’. *indicates phosphorothioate bond
tDNA	ssDNA oligonucleotide
wzi_Kp ATCC 700721	oES_107_wzi_deletion	T*G*CCTCCTGCAGCACTACCACCCTCTCTCCTCTATTTTCAGCATTCAGCCTGTACAAGATCCATTTTCAGCCCCGCTGTCGTATCTCAATGAGAATGA*G*G
araA	oES_85_araA_deletion	G*G*AAAAAGCCCCGCAATCTCAGGCAGCGCTCACCCATTAAGGATACGAAAGAGGCCGTCCCCTCACCCTTCCCCTCTCCCCGTTGGGGAGAGGGGACC*G*A
scrK	oES_84_ScrK_deletion	G*C*CACGGCTGGCGCCGCCCACGCCATATCATCATGCATTTAGAGGGTACTTGTCATTACCGTCACGCCTGCCTGCGATCCTGCAGGCCGTTATGCAGG*G*C
glpK	oES_78_glpK_deletion	C*C*ACCGCTCAACATAAAGCTTCGCTGTAATCTGACTACGGGACACCGACTGATTGTGAAGTTATTCCCGGCTTGCGGCGTAAACGCCTGAGCCGGGCT*A*C
dhak	oES_82_dhaK_deletion	T*C*CGCCAGCAGAGAGGCGGCATCGAACCTTCTCCAACGGAGCACTGAATAGGAGCACGACATGTCACTGAACAGAACGCAAATCGTCGACTGGCTGTA*C*C
wzi_point mutation	oES_198_wzi_pointmut	C*A*GGCCAGGTCGTTACGCAAGTCGTTGTCATTTACCACTAACCCGGCTGCTTAAGCCTGCGCTCCCAGGGAGGAAAGCAAACCCAACGTCACGGCAAT*G*C
scrK_pointmutation	oES_200_scrK_pointmut	C*C*GGACAGATGCAGATCATCTTCGGCACCGGCGTGGTCAATAAAGTCTAAGCCGCCTTTATCCAGGCCGCAGGCATCAGCGAATCGAGCAAATCCGAA*G*C
araA_pointmutation	oES_195_araA_pointmut	T*T*TTTGATAACTATGAAGTATGGTTCGTTATTGGCAGCCAACATCTCTAAGGCCCGGAAGCCCTGCGCCAGGTGACGAAGCATGCCGAACATGTGGTG*A*A
malQ_point mutation	oES_207_malQ_pointmut	C*G*CTGTTTGGTGACAGCCGCGATAGACTGCGGCTTGCCGTGCGCGTTGATTTAGCTGGGGCTGATGCCCGCCGCCAGCGCGGCATTATCGAGGCGTTT*A*C
wzi_Kp ATCC BAA-1705	oES_399_wzi_BAA_deletion	T*G*CATCCTGCAGCGCTACCACCCTCTCTCCCCTGTTTTCAGCATTCAGCCTGTACAAGATCCATTTTCAGCCCCGCTGTCGTATCTCAATGAGAATGA*G*G
wzi_Kp ATCC 700603	oES_400_wzi_700603_deletion	T*G*CGTCCTGCAGCGCTACCACCCTCTCTCCCCTGTTTTCAGCATTCAGCCTGTACAAGATCCATTTTCAGCCCCGCTGTCGTATCTCAATGAGAATGA*G*G
