# Supplementary material for: RECKLEEN: a lambda Red/CRISPR-Cas9 based single plasmid platform for fast, efficient, markerless, and scarless genome editing in Klebsiella pneumoniae
Source: Research Square preprint supplement (doi:10.21203/rs.3.rs-5859838/v1), 2025-02-28
Supplement: Supplementary file 4 [file Figure3B4C4D_editingefficiencies.xlsx]

## Sheet: deletion
wzi	araA	scrK	glpK	dhaK		wzi	araA	scrK	glpK	dhaK
23	23	24	23	22
21	22	24	23	23
24	22	23	23	23
22	22	22	23	23
19	20	20	22	24
22	21	20	22	25
21.8333	21.6667	22.1667	22.6667	23.3333	Mean	87.3333	86.6667	88.6667	90.6667	93.3333
1.57233	0.942809	1.67498	0.471405	0.942809	SD	6.28932	3.77124	6.69992	1.88562	3.77124

## Sheet: pointmutation
wzi	scrK	araA	malQ			wzi	scrK	araA	malQ
19	23	24	23
20	22	24	22
21	22	22	23
20	19	22	23
20	21	23	18
23	20	23	23
20.5	21.1667	23	22		Mean	82	84.6667	92	88
1.25831	1.34371	0.816497	1.82574		SD	5.03322	5.37484	3.26599	7.30297

## Sheet: integration
rpsB-mScarlet-I	rplS-mScarlet-I	rpoS-mScarlet-I				rpsB-mScarlet-I	rplS-mScarlet-I	rpoS-mScarlet-I
20	24	25
24	25	25
22	23	23
23	23	23
22	23	23
22	24	22
22.1667	23.6667	23.5			Mean	88.6667	94.6667	94
1.21335	0.745356	1.11803			SD	4.85341	2.98142	4.47214
