# Supplementary material for: RECKLEEN: a lambda Red/CRISPR-Cas9 based single plasmid platform for fast, efficient, markerless, and scarless genome editing in Klebsiella pneumoniae
Source: Research Square preprint supplement (doi:10.21203/rs.3.rs-5859838/v1), 2025-02-28
Supplement: Supplementary file 7 [file Figure3C_differentdonorDNAtemplates.xlsx]

## Sheet: different d(DNA) tempelate
Day1
	+Atc						-Atc
	CFU ∆wzi	Dilution	CFU ∆wzi per mL	CFU WT	Dilution	CFU WT per mL	CFU ∆wzi	Dilution	CFU ∆wzi per mL	CFU WT	Dilution	CFU WT per mL
500b_1	205	100	205000	10	100	10000	38	10000	3800000	212	10000	21200000	95.3488	15.2
500b_2	167	100	167000	23	100	23000	32	10000	3200000	189	10000	18900000	87.8947	14.4796
100bp_1	43	10	4300	13	10	1300	12	10000	1200000	234	10000	23400000	76.7857	4.87805
100bp_2	58	10	5800	25	10	2500	8	10000	800000	284	10000	28400000	69.8795	2.73973
SSDNA_1	156	1	1560	55	1	550	0	10000	0	224	10000	22400000	73.9336	0
SSDNA_2	133	1	1330	59	1	590	2	10000	200000	235	10000	23500000	69.2708	0.843882
Day2
	+Atc						-Atc
	CFU ∆wzi	Dilution	CFU ∆wzi per mL	CFU WT	Dilution	CFU WT per mL	CFU ∆wzi	Dilution	CFU ∆wzi per mL	CFU WT	Dilution	CFU WT per mL
500b_1	349	100	349000	13	100	13000	33	10000	3300000	234	10000	23400000	96.4088	12.3596
500b_2	245	100	245000	17	100	17000	23	10000	2300000	196	10000	19600000	93.5115	10.5023
100bp_1	123	10	12300	19	10	1900	15	10000	1500000	254	10000	25400000	86.6197	5.57621
100bp_2	150	10	15000	33	10	3300	5	10000	500000	290	10000	29000000	81.9672	1.69492
SSDNA_1	222	1	2220	45	1	450	1	10000	100000	248	10000	24800000	83.1461	0.401606
SSDNA_2	260	1	2600	78	1	780	0	10000	0	260	10000	26000000	76.9231	0
Day3
	+Atc						-Atc
	CFU ∆wzi	Dilution	CFU ∆wzi per mL	CFU WT	Dilution	CFU WT per mL	CFU ∆wzi	Dilution	CFU ∆wzi per mL	CFU WT	Dilution	CFU WT per mL
500b_1	179	100	179000	29	100	29000	51	10000	5100000	289	10000	28900000	86.0577	15
500b_2	163	100	163000	16	100	16000	22	10000	2200000	253	10000	25300000	91.0615	8
100bp_1	147	10	14700	56	10	5600	2	10000	200000	264	10000	26400000	72.4138	0.75188
100bp_2	96	10	9600	18	10	1800	0	10000	0	240	10000	24000000	84.2105	0
SSDNA_1	45	1	450	21	1	210	0	10000	0	287	10000	28700000	68.1818	0
SSDNA_2	109	1	1090	38	1	380	2	10000	200000	233	10000	23300000	74.1497	0.851064
	dsDNA_500bp/500bp						Average	SD
ATC	95.3488	87.8947	96.4088	93.5114	86.0577	91.0614	91.7138	3.77471
	15.2	14.4796	12.3596	10.5023	15	8	12.5902	2.63536
	dsDNA_100bp/100bp
ATC	76.7857	69.8795	86.6197	81.9672	72.4138	84.2105	78.6461	6.12001
	4.87805	2.73973	5.57621	1.69491	0.75188	0	2.6068	2.04374
	ssDNA_50bp/50bp
ATC	73.9337	69.2708	83.1461	76.9231	68.1818	74.1497	74.2675	4.9667
	0	0.843882	0	0	0	0.851064	0.282491	0.399508
