# Supplementary material for: RECKLEEN: a lambda Red/CRISPR-Cas9 based single plasmid platform for fast, efficient, markerless, and scarless genome editing in Klebsiella pneumoniae
Source: Research Square preprint supplement (doi:10.21203/rs.3.rs-5859838/v1), 2025-02-28
Supplement: Supplementary file 10 [file Figure3D&S6_Killing efficiency of CRISPRCas9 in kp.xlsx]

## Sheet: colonycount_killingeff_day1
Experiment Killing Efficiency
Day1
	+Atc			-Atc
	CFU	Dilution	CFU per mL	CFU	Dilution	CFU per mL
wzi_deletion_1	52	100	52000	240	100000	240000000	0.999783	99.9783
wzi_deletion_2	144	100	144000	257	100000	257000000	0.99944	99.944
araA_deletion	139	100	139000	218	100000	218000000	0.999362	99.9362
scrK_deletion	260	10	26000	267	100000	267000000	0.999903	99.9903
glpK_deletion	87	10	8700	279	100000	279000000	0.999969	99.9969
dhaK_deletion	103	100	103000	312	100000	312000000	0.99967	99.967
wzi (point mutation)	107	100	107000	342	100000	342000000	0.999687	99.9687
scrK (point mutation)	135	10	13500	297	100000	297000000	0.999955	99.9955
araA (point mutation)	120	10000	12000000	330	100000	330000000	0.963636	96.3636
malQ (point mutation)	73	100	73000	316	100000	316000000	0.999769	99.9769
rpsB_integration	153	1000	1530000	324	100000	324000000	0.995278	99.5278
rplS_integration	134	1000	1340000	323	100000	323000000	0.995851	99.5851
rpoS_integration	23	100	23000	259	100000	259000000	0.999911	99.9911
2 deletions (araA, scrK)	44	10	4400	201	100000	201000000	0.999978	99.9978
3 deletions (araA, scrK, dhaK)	50	10	5000	233	100000	233000000	0.999979	99.9979
wzi_Kp_ATCC BAA-1705	139	100	139000	201	100000	201000000	0.999308	99.9308
wzi_Kp_ATCC 700603	59	10	5900	113	100000	113000000	0.999948	99.9948
empty plasmid	79	100000	79000000	82	100000	82000000	0.0365854	3.65854
control gRNA_1	268	100000	268000000	311	100000	311000000	0.138264	13.8264
control gRNA_2	249	100000	249000000	285	100000	285000000	0.126316	12.6316

## Sheet: colonycount_killingeff_day2
Experiment Killing Efficiency
Day2
	+Atc			-Atc
	CFU	Dilution	CFU per mL	CFU	Dilution	CFU per mL
wzi_deletion_1	112	100	112000	319	100000	319000000	0.999649	99.9649
wzi_deletion_2	156	100	156000	282	100000	282000000	0.999447	99.9447
araA_deletion	170	10	17000	244	100000	244000000	0.99993	99.993
scrK_deletion	162	100	162000	230	100000	230000000	0.999296	99.9296
glpK_deletion	123	100	123000	279	100000	279000000	0.999559	99.9559
dhaK_deletion	96	100	96000	299	100000	299000000	0.999679	99.9679
wzi (point mutation)	93	100	93000	330	100000	330000000	0.999718	99.9718
scrK (point mutation)	110	10	11000	301	100000	301000000	0.999963	99.9963
araA (point mutation)	90	10000	9000000	284	100000	284000000	0.96831	96.831
malQ (point mutation)	71	10	7100	306	100000	306000000	0.999977	99.9977
rpsB_integration	133	1000	1330000	305	100000	305000000	0.995639	99.5639
rplS_integration	111	1000	1110000	334	100000	334000000	0.996677	99.6677
rpoS_integration	116	10	11600	254	100000	254000000	0.999954	99.9954
2 deletions (araA, scrK)	70	10	7000	199	100000	199000000	0.999965	99.9965
3 deletions (araA, scrK, dhaK)	37	10	3700	246	100000	246000000	0.999985	99.9985
wzi_Kp_ATCC BAA-1705	220	100	220000	190	100000	190000000	0.998842	99.8842
wzi_Kp_ATCC 700603	110	10	11000	159	100000	159000000	0.999931	99.9931
empty plasmid	75	100000	75000000	63	100000	63000000	-0.190476	-19.0476
control gRNA_1	240	100000	240000000	280	100000	280000000	0.142857	14.2857
control gRNA_2	273	100000	273000000	314	100000	314000000	0.130573	13.0573

## Sheet: colonycount_killingeff_day3
Experiment Killing Efficiency
Day3
	+Atc			-Atc
	CFU	Dilution	CFU per mL	CFU	Dilution	CFU per mL
wzi_deletion_1	30	100	30000	283	100000	283000000	0.999894	99.9894
wzi_deletion_2	199	100	199000	276	100000	276000000	0.999279	99.9279
araA_deletion	59	100	59000	218	100000	218000000	0.999729	99.9729
scrK_deletion	84	100	84000	267	100000	267000000	0.999685	99.9685
glpK_deletion	93	100	93000	279	100000	279000000	0.999667	99.9667
dhaK_deletion	90	100	90000	312	100000	312000000	0.999712	99.9712
wzi (point mutation)	149	100	149000	342	100000	342000000	0.999564	99.9564
scrK (point mutation)	144	10	14400	297	100000	297000000	0.999952	99.9952
araA (point mutation)	107	10000	10700000	330	100000	330000000	0.967576	96.7576
malQ (point mutation)	86	10	8600	316	100000	316000000	0.999973	99.9973
rpsB_integration	140	1000	1400000	324	100000	324000000	0.995679	99.5679
rplS_integration	120	1000	1200000	323	100000	323000000	0.996285	99.6285
rpoS_integration	124	100	124000	259	100000	259000000	0.999521	99.9521
2 deletions (araA, scrK)	110	10	11000	255	100000	255000000	0.999957	99.9957
3 deletions (araA, scrK, dhaK)	40	10	4000	167	100000	167000000	0.999976	99.9976
wzi_Kp_ATCC BAA-1705	50	100	50000	189	100000	189000000	0.999735	99.9735
wzi_Kp_ATCC 700603	119	10	11900	137	100000	137000000	0.999913	99.9913
empty plasmid	60	100000	60000000	59	100000	59000000	-0.0169492	-1.69492
control gRNA_1	253	100000	253000000	278	100000	278000000	0.0899281	8.99281
control gRNA_2	277	100000	277000000	302	100000	302000000	0.0827815	8.27815

## Sheet: together
	Day1	Day2	Day3	Mean	SD
wzi_deletion_1	99.9783	99.9649	99.9894	99.9775	0.0100217
wzi_deletion_2	99.944	99.9447	99.9279	99.9389	0.00774824
araA_deletion	99.9362	99.993	99.9729	99.9674	0.0235126
scrK_deletion	99.9903	99.9296	99.9685	99.9628	0.025108
glpK_deletion	99.9969	99.9559	99.9667	99.9732	0.0173428
dhaK_deletion	99.967	99.9679	99.9711	99.9687	0.00178709
wzi (point mutation)	99.9687	99.9718	99.9564	99.9657	0.00664432
scrK (point mutation)	99.9955	99.9964	99.9951	99.9956	0.000509902
araA (point mutation)	96.3636	96.831	96.7576	96.6507	0.205208
malQ (point mutation)	99.9769	99.9977	99.9973	99.9906	0.00970288
rpsB_integration	99.5278	99.5639	99.5679	99.5532	0.0180499
rplS_integration	99.5851	99.6677	99.6285	99.6271	0.0337029
rpoS_integration	99.9911	99.9954	99.9521	99.9796	0.0194803
2 deletions (araA, scrK)	99.9978	99.9965	99.9957	99.9967	0.000874631
3 deletions (araA, scrK, dhaK)	99.9978	99.9985	99.9976	99.998	0.000377479
wzi_Kp_ATCC BAA-1705	99.9309	99.8842	99.9735	99.9295	0.0364807
wzi_Kp_ATCC 700603	99.9948	99.9931	99.9913	99.9931	0.00141672
empty plasmid	3.65854	-19.0476	-1.69492	-5.69466	9.6916
control gRNA_1	13.8264	14.2857	8.99281	12.3683	2.39419
control gRNA_2	12.6316	13.0573	8.27815	11.3223	2.15958
					wzi_deletion_1	wzi_deletion_2	araA_deletion	scrK_deletion	glpK_deletion	dhaK_deletion	wzi (point mutation)	scrK (point mutation)	araA (point mutation)	malQ (point mutation)	rpsB_integration	rplS_integration	rpoS_integration	2 deletions (AraA, ScrK)	3 deletions (AraA, ScrK, dhaK)	wzi_Kp_ATCC BAA-1705	wzi_Kp_ATCC 700603	empty plasmid	control gRNA_1	control gRNA_2
					99.9783	99.944	99.9362	99.9903	99.9969	99.967	99.9687	99.9955	96.3636	99.9769	99.5278	99.5851	99.9911	99.9978	99.9978	99.9309	99.9948	3.65854	13.8264	12.6316
					99.9649	99.9447	99.993	99.9296	99.9559	99.9679	99.9718	99.9964	96.831	99.9977	99.5639	99.6677	99.9954	99.9965	99.9985	99.8842	99.9931	-19.0476	14.2857	13.0573
					99.9894	99.9279	99.9729	99.9685	99.9667	99.9711	99.9564	99.9951	96.7576	99.9973	99.5679	99.6285	99.9521	99.9957	99.9976	99.9735	99.9913	-1.69492	8.99281	8.27815
				Mean	99.9775	99.9389	99.9674	99.9628	99.9732	99.9687	99.9657	99.9956	96.6507	99.9906	99.5532	99.6271	99.9796	99.9967	99.998	99.9295	99.9931	-5.69466	12.3683	11.3223
				SD	0.0100217	0.00774824	0.0235126	0.025108	0.0173428	0.00178709	0.00664432	0.000509902	0.205208	0.00970288	0.0180499	0.0337029	0.0194803	0.000874631	0.000377479	0.0364807	0.00141672	9.6916	2.39419	2.15958
