# Supplementary material for: RECKLEEN: a lambda Red/CRISPR-Cas9 based single plasmid platform for fast, efficient, markerless, and scarless genome editing in Klebsiella pneumoniae
Source: Research Square preprint supplement (doi:10.21203/rs.3.rs-5859838/v1), 2025-02-28
Supplement: Supplementary file 13 [file Figure4BkillingefficiencyofRECKLEEN2usingSpGCas9variantallPAMsequences.xlsx]

## Sheet: Kp_SpG
Experiment Killing Efficiency spG Cas9
Day1
	+Atc			-Atc
	CFU	Dilution	CFU per mL	CFU	Dilution	CFU per mL
spG Cas9 NGG_1	195	100	195000	326	100000	326000000	0.999402	99.9402
spG Cas9 NGG_2	243	100	243000	278	100000	278000000	0.999126	99.9126
spG Cas9 NGT_1	265	1000	2650000	245	100000	245000000	0.989184	98.9184
spG Cas9 NGT_2	53	10000	5300000	315	100000	315000000	0.983175	98.3175
spG Cas9 NGA_1	358	10000	35800000	256	100000	256000000	0.860156	86.0156
spG Cas9 NGA_2	165	10000	16500000	234	100000	234000000	0.929487	92.9487
spG Cas9 NGC_1	115	100000	115000000	260	100000	260000000	0.557692	55.7692
spG Cas9 NGC_2	59	100000	59000000	262	100000	262000000	0.774809	77.4809
spG Cas9 NGG_Control2	237	100000	237000000	257	100000	257000000	0.077821	7.7821
spG Cas9 NGG_Control2	135	100000	135000000	158	100000	158000000	0.14557	14.557
Cas9 NGG_1	52	100	52000	240	100000	240000000	0.999783	99.9783
Cas9 NGG_2	144	100	144000	257	100000	257000000	0.99944	99.944
											SpG_NGG	SpG_NGT	SpG_NGA	SpG_NGC	SpG_NGG_Control	Cas9_NGG
											99.9402	98.9184	86.0156	55.7692	7.7821	99.9783
											99.9126	98.3175	92.9487	77.4809	14.557	99.944
											99.8803	99.1738	89.2969	48.0969	22.3464	99.9649
											99.8901	99.3214	92.5296	89.5425	-8.28025	99.9447
Experiment Killing Efficiency spG Cas9											99.8983	99.204	80.7333	91.8889	3.95683	99.9894
Day2											99.9067	99.3803	71.6667	93.6818	3.68852	99.9279
	+Atc			-Atc						Mean	99.9047	99.0526	85.5318	76.0767	7.34176	99.9582
	CFU	Dilution	CFU per mL	CFU	Dilution	CFU per mL				SD	0.0190247	0.35957	7.45718	17.9746	9.54151	0.0213189
spG Cas9 NGG_1	280	100	280000	234	100000	234000000	0.998803	99.8803
spG Cas9 NGG_2	234	100	234000	213	100000	213000000	0.998901	99.8901
spG Cas9 NGT_1	309	1000	3090000	374	100000	374000000	0.991738	99.1738
spG Cas9 NGT_2	190	1000	1900000	280	100000	280000000	0.993214	99.3214
spG Cas9 NGA_1	274	10000	27400000	256	100000	256000000	0.892969	89.2969
spG Cas9 NGA_2	189	10000	18900000	253	100000	253000000	0.925296	92.5296
spG Cas9 NGC_1	150	100000	150000000	289	100000	289000000	0.480969	48.0969
spG Cas9 NGC_2	320	10000	32000000	306	100000	306000000	0.895425	89.5425
spG Cas9 NGG_Control2	139	100000	139000000	179	100000	179000000	0.223464	22.3464
spG Cas9 NGG_Control2	340	100000	340000000	314	100000	314000000	-0.0828025	-8.28025
Cas9 NGG_1	112	100	112000	319	100000	319000000	0.999649	99.9649
Cas9 NGG_2	156	100	156000	282	100000	282000000	0.999447	99.9447
Experiment Killing Efficiency spG Cas9
Day3
	+Atc			-Atc
	CFU	Dilution	CFU per mL	CFU	Dilution	CFU per mL
spG Cas9 NGG_1	359	100	359000	353	100000	353000000	0.998983	99.8983
spG Cas9 NGG_2	320	100	320000	343	100000	343000000	0.999067	99.9067
spG Cas9 NGT_1	199	1000	1990000	250	100000	250000000	0.99204	99.204
spG Cas9 NGT_2	145	1000	1450000	234	100000	234000000	0.993803	99.3803
spG Cas9 NGA_1	289	10000	28900000	150	100000	150000000	0.807333	80.7333
spG Cas9 NGA_2	340	10000	34000000	120	100000	120000000	0.716667	71.6667
spG Cas9 NGC_1	146	10000	14600000	180	100000	180000000	0.918889	91.8889
spG Cas9 NGC_2	139	10000	13900000	220	100000	220000000	0.936818	93.6818
spG Cas9 NGG_Control2	267	100000	267000000	278	100000	278000000	0.0395683	3.95683
spG Cas9 NGG_Control2	235	100000	235000000	244	100000	244000000	0.0368852	3.68852
Cas9 NGG_1	30	100	30000	283	100000	283000000	0.999894	99.9894
Cas9 NGG_2	199	100	199000	276	100000	276000000	0.999279	99.9279
