# Supplementary material for: RECKLEEN: a lambda Red/CRISPR-Cas9 based single plasmid platform for fast, efficient, markerless, and scarless genome editing in Klebsiella pneumoniae
Source: Research Square preprint supplement (doi:10.21203/rs.3.rs-5859838/v1), 2025-02-28
Supplement: Supplementary file 16 [file Figure6Aplasmidcuring.xlsx]

## Sheet: Sheet1
wzi	scrK	araA	dhaK	glpK	araA + scrK	araA + scrK +dhaK	wzi	scrK	araA	malQ	rpsB	rplS	rpoS
25	25	25	25	25	24	25	25	25	24	25	25	24	24
24	25	24	25	25	25	24	25	25	23	25	23	23	24
25	25	25	25	24	25	25	25	25	24	24	23	24	24
24.6667	25	24.6667	25	24.6667	24.6667	24.6667	25	25	23.6667	24.6667	23.6667	23.6667	24	Mean
0.471405	0	0.471405	0	0.471405	0.471405	0.471405	0	0	0.471405	0.471405	0.942809	0.471405	0	SD
98.6667	100	98.6667	100	98.6667	98.6667	98.6667	100	100	94.6667	98.6667	94.6667	94.6667	96	Mean (%)
1.88562	0	1.88562	0	1.88562	1.88562	1.88562	0	0	1.88562	1.88562	3.77124	1.88562	0	SD
