# Supplementary material for: RECKLEEN: a lambda Red/CRISPR-Cas9 based single plasmid platform for fast, efficient, markerless, and scarless genome editing in Klebsiella pneumoniae
Source: Research Square preprint supplement (doi:10.21203/rs.3.rs-5859838/v1), 2025-02-28
Supplement: Supplementary file 19 [file WT.xlsx]

## Sheet: OD600
time (h)	blank1	blank2	blank3	blank4	blank5	blank6	WT1	WT2	WT3	WT4	WT5	WT6	WT-B	WT-B	WT-B	WT-B	WT-B	WT-B
0	0.0806	0.0884	0.0884	0.0872	0.0885	0.0899	0.097	0.0937	0.0955	0.1023	0.102	0.1033	0.0164	0.0053	0.0071	0.0151	0.0135	0.0134
0.0999444	0.0804	0.0879	0.0878	0.0865	0.0865	0.0889	0.0969	0.094	0.0951	0.1018	0.1013	0.1034	0.0165	0.0061	0.0073	0.0153	0.0148	0.0145
0.199944	0.0807	0.0882	0.0879	0.0864	0.0861	0.0898	0.096	0.0941	0.0955	0.1025	0.1013	0.1041	0.0153	0.0059	0.0076	0.0161	0.0152	0.0143
0.299944	0.0809	0.088	0.088	0.0874	0.0869	0.0882	0.096	0.0949	0.0955	0.1026	0.1016	0.104	0.0151	0.0069	0.0075	0.0152	0.0147	0.0158
0.399972	0.0809	0.0878	0.0878	0.088	0.0884	0.0904	0.0964	0.0953	0.0958	0.1033	0.1025	0.1044	0.0155	0.0075	0.00799999	0.0153	0.0141	0.014
0.499972	0.0807	0.0877	0.0879	0.0878	0.0879	0.0897	0.0973	0.096	0.0961	0.1044	0.1033	0.1053	0.0166	0.0083	0.00820001	0.0166	0.0154	0.0156
0.6	0.0809	0.0879	0.0879	0.0866	0.0874	0.0879	0.0971	0.0969	0.0967	0.1057	0.1039	0.1065	0.0162	0.009	0.0088	0.0191	0.0165	0.0186
0.7	0.0816	0.088	0.088	0.0868	0.0875	0.0898	0.098	0.097	0.0975	0.107	0.1055	0.1076	0.0164	0.009	0.0095	0.0202	0.018	0.0178
0.8	0.0816	0.0876	0.0881	0.0881	0.0874	0.0894	0.0984	0.0973	0.098	0.1076	0.1063	0.1085	0.0168	0.0097	0.0099	0.0195	0.0189	0.0191
0.900028	0.0814	0.0881	0.0879	0.0871	0.0866	0.0887	0.0992	0.0988	0.0988	0.109	0.1077	0.1096	0.0178	0.0107	0.0109	0.0219	0.0211	0.0209
1.00003	0.0808	0.0878	0.0877	0.0866	0.0871	0.088	0.1002	0.0995	0.0999	0.1115	0.1091	0.1116	0.0194	0.0117	0.0122	0.0249	0.022	0.0236
1.10006	0.081	0.0879	0.0878	0.0887	0.0882	0.0885	0.1014	0.1004	0.1011	0.1139	0.1113	0.1145	0.0204	0.0125	0.0133	0.0252	0.0231	0.026
1.20006	0.081	0.088	0.0879	0.0867	0.0863	0.0881	0.102	0.1022	0.1027	0.118	0.114	0.1173	0.021	0.0142	0.0148	0.0313	0.0277	0.0292
1.30006	0.0808	0.088	0.088	0.0878	0.0875	0.0885	0.1041	0.1047	0.104	0.1217	0.1176	0.1217	0.0233	0.0167	0.016	0.0339	0.0301	0.0332
1.40008	0.081	0.0881	0.0879	0.0876	0.0872	0.0881	0.1061	0.1066	0.1063	0.1258	0.1223	0.1266	0.0251	0.0185	0.0184	0.0382	0.0351	0.0385
1.50008	0.0807	0.0883	0.0879	0.0869	0.088	0.0892	0.1078	0.1096	0.1092	0.1326	0.1267	0.133	0.0271	0.0213	0.0213	0.0457	0.0387	0.0438
1.60011	0.0816	0.0885	0.0883	0.0868	0.0861	0.0884	0.1112	0.1131	0.1125	0.14	0.1347	0.1408	0.0296	0.0246	0.0242	0.0532	0.0486	0.0524
1.70011	0.0806	0.0884	0.0879	0.0868	0.0866	0.0885	0.1142	0.1174	0.1171	0.1503	0.1413	0.1493	0.0336	0.029	0.0292	0.0635	0.0547	0.0608
1.80014	0.0811	0.0896	0.0881	0.0873	0.0859	0.0883	0.1192	0.1221	0.1214	0.1575	0.1523	0.1605	0.0381	0.0325	0.0333	0.0702	0.0664	0.0722
1.90014	0.0809	0.0898	0.0878	0.0879	0.0873	0.0883	0.1232	0.128	0.1268	0.1704	0.1625	0.1713	0.0423	0.0382	0.039	0.0825	0.0752	0.083
2.00014	0.0812	0.0908	0.0876	0.0879	0.0884	0.0891	0.1294	0.1334	0.1328	0.1817	0.1721	0.1834	0.0482	0.0426	0.0452	0.0938	0.0837	0.0943
2.10017	0.0813	0.0908	0.0879	0.086	0.0856	0.0871	0.1352	0.1421	0.1405	0.1946	0.1889	0.1972	0.0539	0.0513	0.0526	0.1086	0.1033	0.1101
2.20017	0.0806	0.0907	0.0878	0.0878	0.0882	0.0888	0.1428	0.1525	0.1495	0.2099	0.2021	0.2134	0.0622	0.0618	0.0617	0.1221	0.1139	0.1246
2.30019	0.0814	0.0914	0.0879	0.0865	0.0864	0.0875	0.1524	0.1622	0.1577	0.2286	0.22	0.2312	0.071	0.0708	0.0698	0.1421	0.1336	0.1437
2.40019	0.0809	0.0914	0.0877	0.0869	0.087	0.0887	0.1624	0.1739	0.1695	0.245	0.239	0.2484	0.0815	0.0825	0.0818	0.1581	0.152	0.1597
2.50019	0.0813	0.0914	0.0878	0.0866	0.0859	0.0881	0.1751	0.1892	0.1826	0.2656	0.2579	0.2701	0.0938	0.0978	0.0948	0.179	0.172	0.182
2.60022	0.0807	0.0911	0.0878	0.0847	0.0852	0.0868	0.1897	0.2042	0.1972	0.285	0.2807	0.291	0.109	0.1131	0.1094	0.2003	0.1955	0.2042
2.70022	0.0812	0.0907	0.0878	0.087	0.0875	0.089	0.2061	0.2218	0.2135	0.3047	0.2991	0.3118	0.1249	0.1311	0.1257	0.2177	0.2116	0.2228
2.80025	0.0808	0.0901	0.0877	0.0865	0.0877	0.0882	0.2255	0.2393	0.2303	0.3243	0.3205	0.3313	0.1447	0.1492	0.1426	0.2378	0.2328	0.2431
2.90025	0.0817	0.0903	0.0878	0.0849	0.0853	0.0878	0.246	0.2598	0.2498	0.3464	0.3454	0.3544	0.1643	0.1695	0.162	0.2615	0.2601	0.2666
3.00025	0.0809	0.0896	0.0878	0.0853	0.0866	0.0871	0.2646	0.2762	0.2661	0.3685	0.3662	0.3767	0.1837	0.1866	0.1783	0.2832	0.2796	0.2896
3.10028	0.0803	0.0895	0.0878	0.0873	0.0864	0.0874	0.2855	0.2949	0.2838	0.393	0.3918	0.4021	0.2052	0.2054	0.196	0.3057	0.3054	0.3147
3.20028	0.0808	0.0893	0.0878	0.0863	0.0861	0.0867	0.3065	0.3134	0.3035	0.4191	0.4207	0.4289	0.2257	0.2241	0.2157	0.3328	0.3346	0.3422
3.30031	0.0809	0.0892	0.0881	0.0871	0.0882	0.0884	0.3305	0.3347	0.3207	0.4413	0.4436	0.4538	0.2496	0.2455	0.2326	0.3542	0.3554	0.3654
3.40031	0.0817	0.0889	0.0879	0.0872	0.087	0.088	0.355	0.3559	0.3405	0.467	0.4687	0.4786	0.2733	0.267	0.2526	0.3798	0.3817	0.3906
3.50031	0.0813	0.0886	0.0878	0.0876	0.0878	0.0876	0.378	0.3738	0.3594	0.4939	0.4968	0.5049	0.2967	0.2852	0.2716	0.4063	0.409	0.4173
3.60033	0.0816	0.0886	0.0877	0.0879	0.0869	0.0886	0.4054	0.3956	0.3793	0.5163	0.5259	0.5289	0.3238	0.307	0.2916	0.4284	0.439	0.4403
3.70033	0.0818	0.0886	0.0876	0.0853	0.0861	0.0878	0.4289	0.4149	0.4	0.5401	0.55	0.5536	0.3471	0.3263	0.3124	0.4548	0.4639	0.4658
3.80033	0.0816	0.0886	0.0877	0.0876	0.0869	0.0876	0.4477	0.433	0.4217	0.5574	0.5727	0.5712	0.3661	0.3444	0.334	0.4698	0.4858	0.4836
3.90036	0.0815	0.0885	0.0876	0.0876	0.0871	0.0881	0.4648	0.4499	0.4416	0.577	0.5889	0.5896	0.3833	0.3614	0.354	0.4894	0.5018	0.5015
4.00036	0.0811	0.0885	0.0879	0.0868	0.0869	0.0885	0.4789	0.4681	0.4653	0.593	0.6071	0.6072	0.3978	0.3796	0.3774	0.5062	0.5202	0.5187
4.10039	0.0812	0.0887	0.088	0.0873	0.0882	0.0889	0.488	0.4822	0.4836	0.6123	0.6302	0.623	0.4068	0.3935	0.3956	0.525	0.542	0.5341
4.20039	0.0817	0.0885	0.0877	0.0856	0.0877	0.0871	0.5008	0.4974	0.5038	0.6314	0.6481	0.64	0.4191	0.4089	0.4161	0.5458	0.5604	0.5529
4.30042	0.0818	0.0887	0.0878	0.0865	0.0864	0.0886	0.5078	0.5191	0.5178	0.6433	0.6711	0.6529	0.426	0.4304	0.43	0.5568	0.5847	0.5643
4.40042	0.0811	0.0886	0.0877	0.0849	0.0855	0.0865	0.522	0.5286	0.5342	0.6633	0.6912	0.6664	0.4409	0.44	0.4465	0.5784	0.6057	0.5799
4.50042	0.0813	0.0888	0.0879	0.0861	0.0862	0.0874	0.531	0.5465	0.5407	0.678	0.7054	0.6798	0.4497	0.4577	0.4528	0.5919	0.6192	0.5924
4.60044	0.0811	0.0887	0.0877	0.0868	0.088	0.0883	0.5438	0.5542	0.5535	0.6911	0.7204	0.6917	0.4627	0.4655	0.4658	0.6043	0.6324	0.6034
4.70044	0.0817	0.0888	0.0879	0.0867	0.0876	0.0883	0.5558	0.569	0.5651	0.7065	0.7363	0.7041	0.4741	0.4802	0.4772	0.6198	0.6487	0.6158
4.80047	0.0819	0.0889	0.088	0.0868	0.087	0.0885	0.5629	0.5764	0.5723	0.7176	0.7472	0.7159	0.481	0.4875	0.4843	0.6308	0.6602	0.6274
4.90047	0.0816	0.0889	0.0878	0.0862	0.0865	0.0877	0.5744	0.5866	0.5826	0.7273	0.7595	0.7293	0.4928	0.4977	0.4948	0.6411	0.673	0.6416
5.00047	0.0818	0.0887	0.0878	0.0873	0.0869	0.0882	0.5821	0.5953	0.5919	0.7404	0.773	0.7423	0.5003	0.5066	0.5041	0.6531	0.6861	0.6541
5.1005	0.0817	0.0889	0.0879	0.0864	0.0874	0.089	0.5888	0.5995	0.5977	0.7494	0.7791	0.7496	0.5071	0.5106	0.5098	0.663	0.6917	0.6606
5.2005	0.082	0.089	0.0879	0.0874	0.0885	0.089	0.594	0.6121	0.6089	0.7601	0.7886	0.7611	0.512	0.5231	0.521	0.6727	0.7001	0.6721
5.30053	0.0816	0.0886	0.0878	0.0853	0.0857	0.0879	0.6006	0.6178	0.6171	0.768	0.8007	0.7692	0.519	0.5292	0.5293	0.6827	0.715	0.6813
5.40053	0.0819	0.0887	0.0879	0.0869	0.087	0.0889	0.6087	0.624	0.623	0.7767	0.8071	0.7783	0.5268	0.5353	0.5351	0.6898	0.7201	0.6894
5.50053	0.0814	0.0886	0.0879	0.0868	0.0879	0.088	0.6161	0.6346	0.636	0.7861	0.8209	0.7876	0.5347	0.546	0.5481	0.6993	0.733	0.6996
5.60056	0.0815	0.0887	0.0879	0.0861	0.0863	0.0863	0.6303	0.6425	0.6459	0.7914	0.8281	0.7955	0.5488	0.5538	0.558	0.7053	0.7418	0.7092
5.70056	0.0817	0.0887	0.088	0.0864	0.0865	0.0893	0.631	0.6493	0.6541	0.8022	0.8357	0.8038	0.5493	0.5606	0.5661	0.7158	0.7492	0.7145
5.80058	0.0817	0.0886	0.0879	0.087	0.0883	0.0877	0.6363	0.655	0.6592	0.808	0.8457	0.8112	0.5546	0.5664	0.5713	0.721	0.7574	0.7235
5.90058	0.0814	0.0884	0.0876	0.0876	0.0885	0.0897	0.6423	0.6644	0.6675	0.8172	0.852	0.8192	0.5609	0.576	0.5799	0.7296	0.7635	0.7295
6.00061	0.0814	0.0886	0.0878	0.0857	0.0864	0.0882	0.6481	0.6681	0.672	0.8214	0.8615	0.8246	0.5667	0.5795	0.5842	0.7357	0.7751	0.7364
6.10061	0.0815	0.0884	0.0877	0.0863	0.0874	0.0886	0.6549	0.6749	0.6785	0.8286	0.8688	0.8328	0.5734	0.5865	0.5908	0.7423	0.7814	0.7442
6.20061	0.0819	0.0887	0.0879	0.0865	0.0876	0.0891	0.6619	0.6823	0.6851	0.8328	0.8748	0.8364	0.58	0.5936	0.5972	0.7463	0.7872	0.7473
6.30064	0.0814	0.0886	0.0877	0.0869	0.0874	0.0874	0.6664	0.6861	0.6919	0.8414	0.8826	0.8448	0.585	0.5975	0.6042	0.7545	0.7952	0.7574
6.40064	0.0809	0.0887	0.0878	0.0875	0.0876	0.0879	0.6731	0.6934	0.7011	0.8498	0.8898	0.8502	0.5922	0.6047	0.6133	0.7623	0.8022	0.7623
6.50064	0.0815	0.0886	0.0878	0.0876	0.0879	0.0889	0.6794	0.7013	0.7101	0.8543	0.898	0.8563	0.5979	0.6127	0.6223	0.7667	0.8101	0.7674
6.60067	0.0814	0.0889	0.0879	0.0864	0.087	0.0886	0.6826	0.7057	0.7149	0.8606	0.9023	0.8634	0.6012	0.6168	0.627	0.7742	0.8153	0.7748
6.70067	0.081	0.0891	0.0879	0.0873	0.0865	0.0877	0.6904	0.7094	0.7192	0.8676	0.91	0.8702	0.6094	0.6203	0.6313	0.7803	0.8235	0.7825
6.80069	0.0816	0.0889	0.0876	0.0878	0.0868	0.0887	0.6929	0.7119	0.7213	0.8698	0.9113	0.8725	0.6113	0.623	0.6337	0.782	0.8245	0.7838
6.90069	0.0813	0.089	0.0878	0.0852	0.0853	0.0871	0.6985	0.7152	0.7305	0.8768	0.9198	0.8779	0.6172	0.6262	0.6427	0.7916	0.8345	0.7908
7.00069	0.081	0.0891	0.0877	0.0867	0.0862	0.0875	0.7028	0.7139	0.7336	0.8754	0.9187	0.8793	0.6218	0.6248	0.6459	0.7887	0.8325	0.7918
7.10072	0.081	0.0889	0.0879	0.0859	0.0853	0.0885	0.7071	0.7191	0.737	0.8835	0.9252	0.8852	0.6261	0.6302	0.6491	0.7976	0.8399	0.7967
7.20072	0.0818	0.0888	0.0879	0.0867	0.0872	0.0895	0.7124	0.7248	0.7441	0.8881	0.9323	0.8902	0.6306	0.636	0.6562	0.8014	0.8451	0.8007
7.30075	0.0816	0.0888	0.0877	0.086	0.0855	0.0867	0.7166	0.7266	0.7462	0.8898	0.9334	0.8927	0.635	0.6378	0.6585	0.8038	0.8479	0.806
7.40075	0.0811	0.0889	0.0878	0.0884	0.0876	0.0886	0.7193	0.7313	0.7518	0.893	0.9363	0.8949	0.6382	0.6424	0.664	0.8046	0.8487	0.8063
7.50078	0.0817	0.0889	0.0878	0.0867	0.0857	0.0878	0.7228	0.7373	0.7566	0.8953	0.9409	0.8987	0.6411	0.6484	0.6688	0.8086	0.8552	0.8109
7.60078	0.0815	0.0891	0.0878	0.0859	0.0858	0.0869	0.724	0.7373	0.7574	0.8988	0.9422	0.9008	0.6425	0.6482	0.6696	0.8129	0.8564	0.8139
7.70078	0.0818	0.089	0.0878	0.087	0.0866	0.088	0.7297	0.7409	0.765	0.9054	0.9471	0.9043	0.6479	0.6519	0.6772	0.8184	0.8605	0.8163
7.80081	0.0813	0.0889	0.0876	0.0872	0.0863	0.0874	0.7334	0.7448	0.7678	0.9067	0.9541	0.9088	0.6521	0.6559	0.6802	0.8195	0.8678	0.8214
7.90081	0.0816	0.089	0.088	0.0868	0.0875	0.0897	0.7365	0.7483	0.774	0.9108	0.961	0.9137	0.6549	0.6593	0.686	0.824	0.8735	0.824
8.00083	0.0814	0.0891	0.0878	0.0865	0.086	0.0878	0.7384	0.7507	0.7753	0.9125	0.9606	0.9156	0.657	0.6616	0.6875	0.826	0.8746	0.8278
8.10083	0.0811	0.0888	0.0877	0.0862	0.087	0.0884	0.7397	0.7491	0.778	0.9178	0.9627	0.9183	0.6586	0.6603	0.6903	0.8316	0.8757	0.8299
8.20083	0.0811	0.089	0.088	0.0877	0.0881	0.0896	0.7434	0.752	0.7825	0.9173	0.967	0.9212	0.6623	0.663	0.6945	0.8296	0.8789	0.8316
8.30086	0.0815	0.0888	0.0877	0.0857	0.0858	0.088	0.7471	0.7549	0.7861	0.9231	0.9723	0.9254	0.6656	0.6661	0.6984	0.8374	0.8865	0.8374
8.40086	0.0809	0.0887	0.0877	0.0864	0.0881	0.0882	0.748	0.7573	0.7886	0.9232	0.9719	0.9259	0.6671	0.6686	0.7009	0.8368	0.8838	0.8377
8.50089	0.0813	0.0888	0.0877	0.0869	0.0876	0.0879	0.75	0.7585	0.7909	0.9253	0.9752	0.9289	0.6687	0.6697	0.7032	0.8384	0.8876	0.841
8.60089	0.0818	0.0891	0.088	0.0873	0.0874	0.0885	0.7525	0.7587	0.7952	0.9286	0.981	0.9328	0.6707	0.6696	0.7072	0.8413	0.8936	0.8443
8.70089	0.0812	0.0887	0.0877	0.0861	0.0859	0.0877	0.754	0.761	0.7975	0.9304	0.98	0.9339	0.6728	0.6723	0.7098	0.8443	0.8941	0.8462
8.80092	0.081	0.0888	0.0878	0.0867	0.087	0.0889	0.7571	0.7622	0.8034	0.9354	0.9865	0.9385	0.6761	0.6734	0.7156	0.8487	0.8995	0.8496
8.90092	0.0811	0.0888	0.0877	0.0871	0.0868	0.0877	0.7596	0.7661	0.8062	0.9362	0.9902	0.9396	0.6785	0.6773	0.7185	0.8491	0.9034	0.8519
9.00094	0.0815	0.0888	0.0877	0.088	0.0877	0.0883	0.7619	0.766	0.8106	0.9396	0.9921	0.9429	0.6804	0.6772	0.7229	0.8516	0.9044	0.8546
9.10094	0.0811	0.0888	0.0878	0.0875	0.087	0.0889	0.7639	0.7668	0.8125	0.9415	0.9936	0.9445	0.6828	0.678	0.7247	0.854	0.9066	0.8556
9.20094	0.0817	0.0888	0.0878	0.0872	0.0865	0.089	0.7655	0.7697	0.8159	0.9428	0.9948	0.9457	0.6838	0.6809	0.7281	0.8556	0.9083	0.8567
9.30097	0.0812	0.0888	0.0877	0.0862	0.087	0.0871	0.7682	0.77	0.8185	0.9444	0.9987	0.9497	0.687	0.6812	0.7308	0.8582	0.9117	0.8626
9.40097	0.0815	0.0888	0.0879	0.0863	0.0879	0.088	0.7691	0.7726	0.8233	0.9474	1.0051	0.9515	0.6876	0.6838	0.7354	0.8611	0.9172	0.8635
9.501	0.0809	0.089	0.0878	0.0871	0.088	0.0894	0.7712	0.7762	0.8269	0.9515	1.0056	0.954	0.6903	0.6872	0.7391	0.8644	0.9176	0.8646
9.601	0.0811	0.089	0.0879	0.0871	0.0876	0.0879	0.7748	0.7753	0.8301	0.9516	1.0108	0.9567	0.6937	0.6863	0.7422	0.8645	0.9232	0.8688
9.701	0.0811	0.0888	0.0876	0.0873	0.088	0.0877	0.7758	0.7778	0.8335	0.9556	1.0124	0.9586	0.6947	0.689	0.7459	0.8683	0.9244	0.8709
9.80103	0.0811	0.0888	0.0878	0.0866	0.0863	0.0877	0.7784	0.779	0.8369	0.9569	1.0154	0.9617	0.6973	0.6902	0.7491	0.8703	0.9291	0.874
9.90103	0.0817	0.0888	0.0878	0.086	0.0876	0.0876	0.7797	0.7807	0.8405	0.9583	1.018	0.964	0.698	0.6919	0.7527	0.8723	0.9304	0.8764
10.0011	0.0812	0.089	0.0878	0.0875	0.0868	0.0881	0.7818	0.7834	0.8428	0.9587	1.0182	0.965	0.7006	0.6944	0.755	0.8712	0.9314	0.8769
10.1011	0.0815	0.0891	0.0877	0.0815	0.0891	0.0877	0.7848	0.7856	0.8488	0.9662	1.0267	0.969	0.7033	0.6965	0.7611	0.8847	0.9376	0.8813
10.2011	0.0811	0.0893	0.088	0.0811	0.0893	0.088	0.7859	0.7863	0.8498	0.9667	1.0281	0.9715	0.7048	0.697	0.7618	0.8856	0.9388	0.8835
10.3011	0.081	0.0891	0.0882	0.081	0.0891	0.0882	0.7877	0.7881	0.8539	0.9686	1.032	0.9739	0.7067	0.699	0.7657	0.8876	0.9429	0.8857
10.4011	0.0814	0.0895	0.0878	0.0814	0.0895	0.0878	0.7894	0.7898	0.8543	0.9668	1.032	0.9739	0.708	0.7003	0.7665	0.8854	0.9425	0.8861
10.5011	0.0808	0.0892	0.0877	0.0808	0.0892	0.0877	0.7899	0.7898	0.8549	0.9685	1.0317	0.9757	0.7091	0.7006	0.7672	0.8877	0.9425	0.888
10.6011	0.0814	0.0895	0.088	0.0814	0.0895	0.088	0.7933	0.7931	0.8621	0.9751	1.0396	0.9796	0.7119	0.7036	0.7741	0.8937	0.9501	0.8916
10.7011	0.0813	0.0893	0.088	0.0813	0.0893	0.088	0.7934	0.793	0.8619	0.9732	1.0402	0.9813	0.7121	0.7037	0.7739	0.8919	0.9509	0.8933
10.8011	0.0815	0.0894	0.0879	0.0815	0.0894	0.0879	0.7961	0.7949	0.8661	0.9781	1.0427	0.9841	0.7146	0.7055	0.7782	0.8966	0.9533	0.8962
10.9011	0.081	0.0893	0.0879	0.081	0.0893	0.0879	0.7956	0.7959	0.8665	0.9772	1.0457	0.9848	0.7146	0.7066	0.7786	0.8962	0.9564	0.8969
11.0011	0.081	0.0893	0.0878	0.081	0.0893	0.0878	0.7979	0.7969	0.8687	0.9784	1.0482	0.9878	0.7169	0.7076	0.7809	0.8974	0.9589	0.9
11.1012	0.0813	0.0893	0.0878	0.0813	0.0893	0.0878	0.7988	0.7993	0.8715	0.9831	1.0505	0.99	0.7175	0.71	0.7837	0.9018	0.9612	0.9022
11.2012	0.0812	0.0894	0.0879	0.0812	0.0894	0.0879	0.8004	0.7998	0.8731	0.9844	1.0536	0.9913	0.7192	0.7104	0.7852	0.9032	0.9642	0.9034
11.3012	0.0811	0.0894	0.0879	0.0811	0.0894	0.0879	0.8019	0.8013	0.8736	0.9837	1.0537	0.9929	0.7208	0.7119	0.7857	0.9026	0.9643	0.905
11.4012	0.0816	0.0893	0.0879	0.0816	0.0893	0.0879	0.8034	0.8015	0.8772	0.988	1.0591	0.9965	0.7218	0.7122	0.7893	0.9064	0.9698	0.9086
11.5012	0.0812	0.0892	0.0878	0.0812	0.0892	0.0878	0.8054	0.804	0.8821	0.9912	1.065	0.9987	0.7242	0.7148	0.7943	0.91	0.9758	0.9109
11.6012	0.0812	0.0892	0.0878	0.0812	0.0892	0.0878	0.8054	0.8044	0.879	0.9896	1.0611	0.9993	0.7242	0.7152	0.7912	0.9084	0.9719	0.9115
11.7012	0.0813	0.0895	0.088	0.0813	0.0895	0.088	0.8078	0.8066	0.8843	0.9946	1.0684	1.0045	0.7265	0.7171	0.7963	0.9133	0.9789	0.9165
11.8013	0.081	0.0892	0.0879	0.081	0.0892	0.0879	0.8081	0.8061	0.8828	0.9933	1.0658	1.0035	0.7271	0.7169	0.7949	0.9123	0.9766	0.9156
11.9013	0.081	0.0893	0.0879	0.081	0.0893	0.0879	0.8089	0.8078	0.8844	0.9949	1.068	1.0059	0.7279	0.7185	0.7965	0.9139	0.9787	0.918
12.0013	0.0812	0.0892	0.088	0.0812	0.0892	0.088	0.8101	0.8079	0.8859	0.9969	1.0688	1.0082	0.7289	0.7187	0.7979	0.9157	0.9796	0.9202
12.1013	0.0813	0.0891	0.0879	0.0813	0.0891	0.0879	0.8103	0.8085	0.8866	0.9992	1.0711	1.0117	0.729	0.7194	0.7987	0.9179	0.982	0.9238
12.2013	0.0817	0.0894	0.0878	0.0817	0.0894	0.0878	0.813	0.8116	0.8916	1.003	1.0804	1.0156	0.7313	0.7222	0.8038	0.9213	0.991	0.9278
12.3013	0.0818	0.0892	0.0879	0.0818	0.0892	0.0879	0.8135	0.811	0.893	1.0046	1.0794	1.0172	0.7317	0.7218	0.8051	0.9228	0.9902	0.9293
12.4013	0.0813	0.0892	0.0878	0.0813	0.0892	0.0878	0.8136	0.8129	0.892	1.0053	1.079	1.0187	0.7323	0.7237	0.8042	0.924	0.9898	0.9309
12.5013	0.0813	0.0891	0.0879	0.0813	0.0891	0.0879	0.8146	0.8131	0.8956	1.009	1.0823	1.0203	0.7333	0.724	0.8077	0.9277	0.9932	0.9324
12.6013	0.0811	0.0891	0.0878	0.0811	0.0891	0.0878	0.816	0.8141	0.8973	1.0118	1.0843	1.0228	0.7349	0.725	0.8095	0.9307	0.9952	0.935
12.7014	0.0807	0.0893	0.0879	0.0807	0.0893	0.0879	0.8162	0.8165	0.8982	1.0105	1.0858	1.025	0.7355	0.7272	0.8103	0.9298	0.9965	0.9371
12.8014	0.081	0.0892	0.0881	0.081	0.0892	0.0881	0.8187	0.8172	0.9025	1.0159	1.0929	1.0286	0.7377	0.728	0.8144	0.9349	1.0037	0.9405
12.9014	0.0812	0.0891	0.0879	0.0812	0.0891	0.0879	0.8187	0.8162	0.9006	1.0136	1.0888	1.0282	0.7375	0.7271	0.8127	0.9324	0.9997	0.9403
13.0014	0.0812	0.0891	0.0878	0.0812	0.0891	0.0878	0.8191	0.8169	0.9025	1.0179	1.0912	1.0302	0.7379	0.7278	0.8147	0.9367	1.0021	0.9424
13.1014	0.081	0.0893	0.088	0.081	0.0893	0.088	0.8204	0.8197	0.9048	1.0174	1.0921	1.0321	0.7394	0.7304	0.8168	0.9364	1.0028	0.9441
13.2014	0.081	0.0892	0.0878	0.081	0.0892	0.0878	0.8207	0.8212	0.9065	1.0207	1.0951	1.0346	0.7397	0.732	0.8187	0.9397	1.0059	0.9468
13.3014	0.0813	0.0893	0.0881	0.0813	0.0893	0.0881	0.8213	0.8223	0.9069	1.0198	1.0952	1.0341	0.74	0.733	0.8188	0.9385	1.0059	0.946
13.4014	0.0808	0.0893	0.0877	0.0808	0.0893	0.0877	0.8227	0.8203	0.9072	1.0229	1.098	1.0363	0.7419	0.731	0.8195	0.9421	1.0087	0.9486
13.5014	0.081	0.0891	0.0879	0.081	0.0891	0.0879	0.8234	0.8218	0.9099	1.0248	1.0987	1.0396	0.7424	0.7327	0.822	0.9438	1.0096	0.9517
13.6014	0.0813	0.089	0.088	0.0813	0.089	0.088	0.8239	0.822	0.9087	1.0257	1.1009	1.0405	0.7426	0.733	0.8207	0.9444	1.0119	0.9525
13.7014	0.0808	0.089	0.0877	0.0808	0.089	0.0877	0.8252	0.8243	0.9134	1.0307	1.1056	1.0437	0.7444	0.7353	0.8257	0.9499	1.0166	0.956
13.8015	0.0808	0.089	0.088	0.0808	0.089	0.088	0.8253	0.8244	0.9121	1.0282	1.1038	1.0437	0.7445	0.7354	0.8241	0.9474	1.0148	0.9557
13.9015	0.0809	0.0893	0.088	0.0809	0.0893	0.088	0.8258	0.8257	0.9143	1.0293	1.1046	1.0452	0.7449	0.7364	0.8263	0.9484	1.0153	0.9572
14.0015	0.081	0.0892	0.0878	0.081	0.0892	0.0878	0.8254	0.826	0.9152	1.0314	1.1053	1.0474	0.7444	0.7368	0.8274	0.9504	1.0161	0.9596

## Sheet: _flu_mscarlet
time (h)	blank1	blank2	blank3	blank4	blank5	blank6	WT1	WT2	WT3	WT4	WT5	WT6	WT-B	WT-B	WT-B	WT-B	WT-B	WT-B
0	35	27	43	31	37	46	37	25	27	37	25	27	2	-2	-16	6	-12	-19
0.0999444	38	31	41	35	39	40	38	30	27	38	30	27	0	-1	-14	3	-9	-13
0.199944	32	26	36	30	43	45	42	36	27	42	36	27	10	10	-9	12	-7	-18
0.299944	42	23	36	26	37	44	32	28	25	32	28	25	-10	5	-11	6	-9	-19
0.399972	33	31	42	41	39	40	42	32	27	42	32	27	9	1	-15	1	-7	-13
0.499972	39	31	43	39	37	43	28	27	29	28	27	29	-11	-4	-14	-11	-10	-14
0.6	34	35	39	35	41	33	37	34	28	37	34	28	3	-1	-11	2	-7	-5
0.7	38	19	33	32	37	44	31	29	35	31	29	35	-7	10	2	-1	-8	-9
0.8	29	31	29	38	41	37	33	34	26	33	34	26	4	3	-3	-5	-7	-11
0.900028	34	26	32	40	30	37	38	40	28	38	40	28	4	14	-4	-2	10	-9
1.00003	39	30	30	37	35	34	30	29	31	30	29	31	-9	-1	1	-7	-6	-3
1.10006	33	28	34	30	37	40	35	30	27	35	30	27	2	2	-7	5	-7	-13
1.20006	35	28	34	39	37	44	31	23	24	31	23	24	-4	-5	-10	-8	-14	-20
1.30006	38	27	40	40	40	33	29	25	29	29	25	29	-9	-2	-11	-11	-15	-4
1.40008	31	23	38	44	39	38	33	34	33	33	34	33	2	11	-5	-11	-5	-5
1.50008	29	37	34	36	42	35	35	33	29	35	33	29	6	-4	-5	-1	-9	-6
1.60011	37	30	36	32	35	41	29	30	29	29	30	29	-8	0	-7	-3	-5	-12
1.70011	30	22	33	40	36	32	36	27	32	36	27	32	6	5	-1	-4	-9	0
1.80014	35	29	31	35	50	39	35	24	28	35	24	28	0	-5	-3	0	-26	-11
1.90014	35	34	41	37	40	33	37	32	26	37	32	26	2	-2	-15	0	-8	-7
2.00014	31	31	42	31	30	39	28	30	31	28	30	31	-3	-1	-11	-3	0	-8
2.10017	30	22	33	35	39	43	28	28	32	28	28	32	-2	6	-1	-7	-11	-11
2.20017	35	23	39	35	41	37	31	28	22	31	28	22	-4	5	-17	-4	-13	-15
2.30019	28	35	36	32	37	37	27	25	24	27	25	24	-1	-10	-12	-5	-12	-13
2.40019	32	31	34	30	45	35	36	31	23	36	31	23	4	0	-11	6	-14	-12
2.50019	31	30	31	36	27	41	34	27	35	34	27	35	3	-3	4	-2	0	-6
2.60022	31	25	36	40	41	36	27	33	25	27	33	25	-4	8	-11	-13	-8	-11
2.70022	30	27	32	45	38	37	30	29	27	30	29	27	0	2	-5	-15	-9	-10
2.80025	28	22	33	35	40	35	32	30	32	32	30	32	4	8	-1	-3	-10	-3
2.90025	32	36	27	41	41	33	33	30	29	33	30	29	1	-6	2	-8	-11	-4
3.00025	35	23	34	39	36	33	29	29	33	29	29	33	-6	6	-1	-10	-7	0
3.10028	35	25	29	33	41	38	34	29	32	34	29	32	-1	4	3	1	-12	-6
3.20028	34	26	29	39	41	42	35	24	22	35	24	22	1	-2	-7	-4	-17	-20
3.30031	26	20	33	35	37	45	33	26	24	33	26	24	7	6	-9	-2	-11	-21
3.40031	36	24	40	37	36	44	34	27	30	34	27	30	-2	3	-10	-3	-9	-14
3.50031	34	33	35	37	39	35	37	28	26	37	28	26	3	-5	-9	0	-11	-9
3.60033	34	20	33	33	40	28	40	30	29	40	30	29	6	10	-4	7	-10	1
3.70033	36	29	31	38	41	36	37	36	42	37	36	42	1	7	11	-1	-5	6
3.80033	38	28	33	36	40	37	46	38	34	46	38	34	8	10	1	10	-2	-3
3.90036	41	28	29	42	32	39	42	40	40	42	40	40	1	12	11	0	8	1
4.00036	36	26	31	35	38	29	56	48	47	56	48	47	20	22	16	21	10	18
4.10039	36	30	29	34	40	40	53	54	50	53	54	50	17	24	21	19	14	10
4.20039	30	27	35	33	33	34	61	55	54	61	55	54	31	28	19	28	22	20
4.30042	33	30	34	40	40	34	67	49	46	67	49	46	34	19	12	27	9	12
4.40042	34	27	34	42	39	33	61	60	53	61	60	53	27	33	19	19	21	20
4.50042	32	26	37	38	36	38	61	62	65	61	62	65	29	36	28	23	26	27
4.60044	29	26	33	36	36	34	66	63	57	66	63	57	37	37	24	30	27	23
4.70044	32	31	32	41	38	37	65	62	64	65	62	64	33	31	32	24	24	27
4.80047	33	26	31	40	37	35	66	61	62	66	61	62	33	35	31	26	24	27
4.90047	35	34	34	33	33	31	63	69	65	63	69	65	28	35	31	30	36	34
5.00047	32	29	34	33	29	30	60	62	62	60	62	62	28	33	28	27	33	32
5.1005	31	30	33	45	32	34	65	64	65	65	64	65	34	34	32	20	32	31
5.2005	35	27	38	33	30	32	58	65	62	58	65	62	23	38	24	25	35	30
5.30053	31	23	37	33	35	37	68	72	59	68	72	59	37	49	22	35	37	22
5.40053	36	32	31	38	37	44	69	60	68	69	60	68	33	28	37	31	23	24
5.50053	32	32	32	32	36	39	54	71	54	54	71	54	22	39	22	22	35	15
5.60056	38	28	34	34	42	37	67	56	66	67	56	66	29	28	32	33	14	29
5.70056	29	27	32	38	35	45	55	65	59	55	65	59	26	38	27	17	30	14
5.80058	33	21	31	35	36	33	53	57	59	53	57	59	20	36	28	18	21	26
5.90058	37	32	36	37	33	29	60	64	55	60	64	55	23	32	19	23	31	26
6.00061	27	29	31	31	34	42	56	56	67	56	56	67	29	27	36	25	22	25
6.10061	31	26	40	35	26	38	60	61	55	60	61	55	29	35	15	25	35	17
6.20061	30	33	33	30	37	35	68	55	50	68	55	50	38	22	17	38	18	15
6.30064	29	27	40	29	34	37	52	54	51	52	54	51	23	27	11	23	20	14
6.40064	35	19	33	38	28	39	57	55	59	57	55	59	22	36	26	19	27	20
6.50064	37	29	30	34	39	27	56	55	48	56	55	48	19	26	18	22	16	21
6.60067	37	26	31	31	32	40	53	57	54	53	57	54	16	31	23	22	25	14
6.70067	31	26	35	40	35	30	55	57	51	55	57	51	24	31	16	15	22	21
6.80069	35	34	29	33	42	34	53	48	44	53	48	44	18	14	15	20	6	10
6.90069	31	29	34	32	36	33	48	51	49	48	51	49	17	22	15	16	15	16
7.00069	30	25	33	36	41	30	49	49	45	49	49	45	19	24	12	13	8	15
7.10072	28	33	34	29	29	38	49	60	53	49	60	53	21	27	19	20	31	15
7.20072	38	26	28	30	30	34	62	48	49	62	48	49	24	22	21	32	18	15
7.30075	28	21	24	30	33	40	51	51	45	51	51	45	23	30	21	21	18	5
7.40075	31	21	31	36	36	34	48	43	46	48	43	46	17	22	15	12	7	12
7.50078	25	27	36	33	36	35	54	48	47	54	48	47	29	21	11	21	12	12
7.60078	32	22	26	31	37	46	48	47	48	48	47	48	16	25	22	17	10	2
7.70078	33	26	41	35	39	40	56	48	50	56	48	50	23	22	9	21	9	10
7.80081	34	19	31	30	43	45	51	53	48	51	53	48	17	34	17	21	10	3
7.90081	32	18	28	26	37	44	53	49	44	53	49	44	21	31	16	27	12	0
8.00083	34	27	31	41	39	40	53	49	48	53	49	48	19	22	17	12	10	8
8.10083	30	23	32	39	37	43	53	49	46	53	49	46	23	26	14	14	12	3
8.20083	27	28	34	35	41	33	49	39	53	49	39	53	22	11	19	14	-2	20
8.30086	21	22	24	32	37	44	55	50	48	55	50	48	34	28	24	23	13	4
8.40086	27	19	33	38	41	37	61	47	46	61	47	46	34	28	13	23	6	9
8.50089	29	24	30	40	30	37	43	55	53	43	55	53	14	31	23	3	25	16
8.60089	25	26	33	37	35	34	49	50	48	49	50	48	24	24	15	12	15	14
8.70089	28	23	33	30	37	40	54	52	51	54	52	51	26	29	18	24	15	11
8.80092	35	28	35	39	37	44	60	52	49	60	52	49	25	24	14	21	15	5
8.90092	31	28	31	40	40	33	46	56	54	46	56	54	15	28	23	6	16	21
9.00094	28	25	33	44	39	38	51	46	46	51	46	46	23	21	13	7	7	8
9.10094	31	23	34	36	42	35	52	47	55	52	47	55	21	24	21	16	5	20
9.20094	36	22	31	32	35	41	51	48	46	51	48	46	15	26	15	19	13	5
9.30097	25	24	33	40	36	32	46	49	49	46	49	49	21	25	16	6	13	17
9.40097	31	25	30	35	50	39	59	49	53	59	49	53	28	24	23	24	-1	14
9.501	20	24	28	37	40	33	46	48	51	46	48	51	26	24	23	9	8	18
9.601	29	23	33	31	30	39	46	47	56	46	47	56	17	24	23	15	17	17
9.701	24	27	29	35	39	43	48	50	54	48	50	54	24	23	25	13	11	11
9.80103	31	26	27	35	41	37	53	53	41	53	53	41	22	27	14	18	12	4
9.90103	26	27	35	32	37	37	56	50	49	56	50	49	30	23	14	24	13	12
10.0011	24	28	28	30	45	35	55	50	47	55	50	47	31	22	19	25	5	12
10.1011	23	26	29	36	27	41	56	49	55	56	49	55	33	23	26	20	22	14
10.2011	27	23	31	40	41	36	46	47	49	46	47	49	19	24	18	6	6	13
10.3011	31	23	37	45	38	37	40	48	47	40	48	47	9	25	10	-5	10	10
10.4011	23	24	27	35	40	35	49	53	53	49	53	53	26	29	26	14	13	18
10.5011	28	27	26	41	41	33	53	47	51	53	47	51	25	20	25	12	6	18
10.6011	28	24	27	39	36	33	39	43	65	39	43	65	11	19	38	0	7	32
10.7011	28	22	33	33	41	38	46	46	58	46	46	58	18	24	25	13	5	20
10.8011	32	25	25	39	41	42	54	50	50	54	50	50	22	25	25	15	9	8
10.9011	28	18	28	35	37	45	46	51	50	46	51	50	18	33	22	11	14	5
11.0011	24	17	26	37	36	44	54	46	54	54	46	54	30	29	28	17	10	10
11.1012	27	22	25	37	39	35	44	43	47	44	43	47	17	21	22	7	4	12
11.2012	24	26	29	33	40	28	53	48	50	53	48	50	29	22	21	20	8	22
11.3012	27	24	24	38	41	36	49	49	50	49	49	50	22	25	26	11	8	14
11.4012	25	23	30	36	40	37	47	48	47	47	48	47	22	25	17	11	8	10
11.5012	28	23	27	42	32	39	45	47	49	45	47	49	17	24	22	3	15	10
11.6012	24	16	34	35	38	29	48	48	48	48	48	48	24	32	14	13	10	19
11.7012	21	25	28	34	40	40	42	49	50	42	49	50	21	24	22	8	9	10
11.8013	21	22	29	33	33	34	39	49	43	39	49	43	18	27	14	6	16	9
11.9013	27	29	31	40	40	34	44	47	48	44	47	48	17	18	17	4	7	14
12.0013	21	24	26	42	39	33	35	44	48	35	44	48	14	20	22	-7	5	15
12.1013	19	20	29	38	36	38	51	46	38	51	46	38	32	26	9	13	10	0
12.2013	24	26	24	36	36	34	42	40	44	42	40	44	18	14	20	6	4	10
12.3013	24	17	33	41	38	37	40	49	38	40	49	38	16	32	5	-1	11	1
12.4013	29	18	25	40	37	35	40	44	46	40	44	46	11	26	21	0	7	11
12.5013	19	27	28	33	33	31	41	38	50	41	38	50	22	11	22	8	5	19
12.6013	29	22	29	33	29	30	41	37	51	41	37	51	12	15	22	8	8	21
12.7014	19	17	24	45	32	34	43	42	43	43	42	43	24	25	19	-2	10	9
12.8014	28	17	27	33	30	32	34	44	41	34	44	41	6	27	14	1	14	9
12.9014	22	16	30	33	35	37	34	41	46	34	41	46	12	25	16	1	6	9
13.0014	26	25	27	38	37	44	39	46	43	39	46	43	13	21	16	1	9	-1
13.1014	21	22	26	32	36	39	40	41	49	40	41	49	19	19	23	8	5	10
13.2014	21	25	24	34	42	37	40	42	44	40	42	44	19	17	20	6	0	7
13.3014	20	19	25	38	35	45	42	47	47	42	47	47	22	28	22	4	12	2
13.4014	20	19	23	35	36	33	36	41	51	36	41	51	16	22	28	1	5	18
13.5014	22	17	27	37	33	29	43	40	48	43	40	48	21	23	21	6	7	19
13.6014	22	20	20	31	34	42	36	39	42	36	39	42	14	19	22	5	5	0
13.7014	18	17	24	35	26	38	43	42	43	43	42	43	25	25	19	8	16	5
13.8015	29	22	27	30	37	35	34	44	41	34	44	41	5	22	14	4	7	6
13.9015	25	21	22	29	34	37	34	41	46	34	41	46	9	20	24	5	7	9
14.0015	19	23	21	38	28	39	39	46	43	39	46	43	20	23	22	1	18	4

## Sheet: mScarlet7OD
time (h)	WT1	WT2	WT3	WT4	WT5	WT6
0	121.951	-377.359	-2253.52	397.351	-888.889	-1417.91
0.1	0	-163.935	-1917.81	196.078	-608.108	-896.552
0.2	653.595	1694.92	-1184.21	745.342	-460.526	-1258.74
0.3	-662.252	724.638	-1466.67	394.737	-612.245	-1202.53
0.4	580.645	133.333	-1875	65.3595	-496.454	-928.571
0.5	-662.651	-481.928	-1707.32	-662.651	-649.351	-897.436
0.6	185.185	-111.111	-1250	104.712	-424.242	-268.817
0.7	-426.829	1111.11	210.526	-49.505	-444.444	-505.618
0.8	238.095	309.278	-303.03	-256.41	-370.37	-575.916
0.9	224.719	1308.41	-366.972	-91.3242	473.934	-430.622
1	-463.918	-85.4701	81.9672	-281.124	-272.727	-127.119
1.1	98.0392	160	-526.316	198.413	-303.03	-500
1.2	-190.476	-352.113	-675.675	-255.591	-505.415	-684.932
1.3	-386.266	-119.76	-687.5	-324.484	-498.339	-120.482
1.4	79.6813	594.595	-271.739	-287.958	-142.45	-129.87
1.5	221.402	-187.793	-234.742	-21.8818	-232.558	-136.986
1.6	-270.27	0	-289.256	-56.391	-102.881	-229.008
1.7	178.571	172.414	-34.2466	-62.9921	-164.534	0
1.8	0	-153.846	-90.0901	0	-391.566	-152.355
1.9	47.2813	-52.356	-384.615	0	-106.383	-84.3373
2	-62.2407	-23.4742	-243.363	-31.9829	0	-84.8356
2.1	-37.1058	116.959	-19.0114	-64.4567	-106.486	-99.9092
2.2	-64.3087	80.9061	-275.527	-32.76	-114.135	-120.385
2.3	-14.0845	-141.243	-171.92	-35.1865	-89.8204	-90.4662
2.4	49.0797	0	-134.474	37.9507	-92.1053	-75.1409
2.5	31.9829	-30.6748	42.1941	-11.1732	0	-32.967
2.6	-36.6972	70.7339	-100.548	-64.9026	-40.9207	-53.8688
2.7	0	15.2555	-39.7773	-68.9022	-42.5331	-44.8833
2.8	27.6434	53.6193	-7.01262	-12.6156	-42.9553	-12.3406
2.9	6.08643	-35.3982	12.3457	-30.5927	-42.2914	-15.0038
3	-32.6619	32.1543	-5.60853	-35.3107	-25.0358	0
3.1	-4.87329	19.4742	15.3061	3.27118	-39.2927	-19.0658
3.2	4.43066	-8.92459	-32.4525	-12.0192	-50.8069	-58.4454
3.3	28.0449	24.4399	-38.693	-5.64653	-30.951	-57.4713
3.4	-7.31797	11.236	-39.5883	-7.89889	-23.5787	-35.8423
3.5	10.1112	-17.5316	-33.137	0	-26.8949	-21.5672
3.6	18.53	32.5733	-13.7174	16.3399	-22.779	2.27118
3.7	2.88101	21.4527	35.2113	-2.19877	-10.7782	12.8811
3.8	21.852	29.036	2.99401	21.2857	-4.11692	-6.20347
3.9	2.60892	33.2042	31.0734	0	15.9426	1.99402
4	50.2765	57.9557	42.3953	41.4856	19.2234	34.7021
4.1	41.7896	60.9911	53.0839	36.1905	25.8303	18.7231
4.2	73.968	68.4764	45.6621	51.3008	39.2577	36.1729
4.3	79.8122	44.145	27.907	48.4914	15.3925	21.2653
4.4	61.2384	75	42.5532	32.8492	34.6706	34.4887
4.5	64.4874	78.6541	61.8375	38.8579	41.9897	45.5773
4.6	79.9654	79.4844	51.5243	49.6442	42.6945	38.1173
4.7	69.6056	64.5564	67.0578	38.7222	36.9971	43.8454
4.8	68.6071	71.7949	64.0099	41.2175	36.3526	43.0347
4.9	56.8182	70.3235	62.6516	46.7946	53.4918	52.9925
5	55.9664	65.1401	55.5445	41.3413	48.0979	48.9222
5.1	67.0479	66.5883	62.7697	30.1659	46.2628	46.927
5.2	44.9219	72.6439	46.0653	37.1637	49.9929	44.6362
5.3	71.2909	92.5926	41.5643	51.267	51.7483	32.2912
5.4	62.6424	52.3071	69.146	44.9406	31.94	34.8129
5.5	41.1446	71.4286	40.1387	31.46	47.749	21.4408
5.6	52.8426	50.5598	57.3477	46.7886	18.873	40.8911
5.7	47.333	67.7845	47.6948	23.7497	40.0427	19.5941
5.8	36.062	63.5593	49.011	24.9653	27.7264	35.9364
5.9	41.0055	55.5556	32.7643	31.5241	40.6025	35.6408
6	51.1735	46.5919	61.6227	33.9812	28.3834	33.9489
6.1	50.5755	59.676	25.3893	33.6791	44.7914	22.8433
6.2	65.5172	37.062	28.4662	50.9179	22.8659	20.0723
6.3	39.3162	45.1883	18.2059	30.4838	25.1509	18.4843
6.4	37.1496	59.5337	42.3936	24.9246	33.6574	26.2364
6.5	31.7779	42.4351	28.925	28.6944	19.7506	27.3651
6.6	26.6134	50.2594	36.6826	28.4164	30.6636	18.0692
6.7	39.383	49.9758	25.3445	19.2234	26.7152	26.8371
6.8	29.4454	22.4719	23.6705	25.5754	7.27714	12.7584
6.9	27.5437	35.1325	23.339	20.2122	17.9748	20.2327
7	30.5565	38.4123	18.5787	16.4828	9.60961	18.9442
7.1	33.541	42.8435	29.2713	25.0752	36.9092	18.8277
7.2	38.059	34.5912	32.0024	39.9301	21.2993	18.7336
7.3	36.2205	47.0367	31.8907	26.1259	21.2289	6.20347
7.4	26.6374	34.2466	22.5904	14.9142	8.24791	14.8828
7.5	45.2348	32.3874	16.4474	25.9708	14.0318	14.7984
7.6	24.9027	38.5683	32.8554	20.9128	11.6768	2.4573
7.7	35.4993	33.7475	13.29	25.6598	10.459	12.2504
7.8	26.0696	51.8372	24.9927	25.6254	11.5234	3.6523
7.9	32.066	47.0196	23.3236	32.767	13.7378	0
8	28.9193	33.2527	24.7273	14.5278	11.4338	9.66417
8.1	34.9226	39.376	20.281	16.835	13.7033	3.61489
8.2	33.2176	16.5913	27.3578	16.8756	-2.27557	24.05
8.3	51.0817	42.0357	34.3643	27.466	14.6644	4.77669
8.4	50.9669	41.8786	18.5476	27.4857	6.78887	10.7437
8.5	20.9361	46.2894	32.7076	3.57824	28.1658	19.025
8.6	35.7835	35.8423	21.2104	14.2636	16.786	16.5818
8.7	38.6445	43.1355	25.3593	28.4259	16.7766	12.9993
8.8	36.9768	35.64	19.564	24.7437	16.6759	5.88512
8.9	22.1076	41.3406	32.0111	7.06631	17.7109	24.6508
9	33.8036	31.01	17.9831	8.21982	7.73994	9.3611
9.1	30.7557	35.3982	28.9775	18.7354	5.51511	23.3754
9.2	21.9362	38.1848	20.6016	22.2066	14.3125	5.83635
9.3	30.5677	36.6999	21.8938	6.99138	14.2591	19.7079
9.4	40.7213	35.098	31.2755	27.8713	-1.09027	16.2131
9.5	37.6648	34.9243	31.1189	10.4118	8.7184	20.8189
9.6	24.5063	34.9701	30.989	17.3511	18.4142	19.5672
9.7	34.5473	33.3817	33.5166	14.9718	11.8996	12.6306
9.8	31.5503	39.1191	18.6891	20.6825	12.9157	4.57666
9.9	42.9799	33.2418	18.5997	27.5135	13.9725	13.6924
10	44.2478	31.682	25.1656	28.6961	5.36826	13.6846
10.1	46.9217	33.0223	34.1611	22.6065	23.4642	15.8856
10.2	26.958	34.4333	23.6282	6.77507	6.39114	14.7142
10.3	12.7352	35.7654	13.0599	-5.63317	10.6056	11.2905
10.4	36.7232	41.4108	33.9204	15.8121	13.7931	20.3137
10.5	35.256	28.547	32.586	13.5181	6.36605	20.2703
10.6	15.4516	27.004	49.0893	0	7.36765	35.8905
10.7	25.2773	34.1054	32.3039	14.5756	5.25818	22.3889
10.8	30.7865	35.4359	32.1254	16.7299	9.44089	8.92658
10.9	25.1889	46.7025	28.2558	12.274	14.6382	5.57476
11	41.8468	40.9836	35.8561	18.9436	10.4286	11.1111
11.1	23.6934	29.5775	28.072	7.76225	4.16146	13.3008
11.2	40.3226	30.9685	26.7448	22.1435	8.29703	24.3524
11.3	30.5216	35.1173	33.0915	12.187	8.29617	15.4696
11.4	30.4794	35.1025	21.5381	12.1359	8.24912	11.0059
11.5	23.4742	33.5758	27.6973	3.2967	15.372	10.9782
11.6	33.14	44.7427	17.6946	14.3109	10.2891	20.8448
11.7	28.9057	33.4681	27.6278	8.75944	9.19399	10.9111
11.8	24.7559	37.6622	17.6123	6.57678	16.3834	9.82962
11.9	23.3549	25.0522	21.3434	4.37685	7.15234	15.2505
12	19.207	27.828	27.5724	-7.64443	5.10412	16.3008
12.1	43.8957	36.1412	11.2683	14.1628	10.1833	0
12.2	24.6137	19.3852	24.8818	6.51254	4.03633	10.7782
12.3	21.8669	44.3336	6.21041	-1.08366	11.1089	1.07608
12.4	15.0212	35.9265	26.1129	0	7.07214	11.8165
12.5	30.0014	15.1934	27.2378	8.62348	5.03423	20.3775
12.6	16.3288	20.6897	27.1773	8.59568	8.03859	22.4599
12.7	32.6309	34.3784	23.4481	-2.151	10.0351	9.6041
12.8	8.13339	37.0879	17.1906	1.06963	13.9484	9.56938
12.9	16.2712	34.3832	19.6875	1.0725	6.0018	9.57141
13	17.6176	28.8541	19.6391	1.06758	8.98114	-1.06112
13.1	25.6965	26.0131	28.1587	8.54336	4.98604	10.5921
13.2	25.6861	23.224	24.429	6.38502	0	7.39332
13.3	29.7297	38.1992	26.8686	4.26212	11.9296	2.11416
13.4	21.5662	30.0958	34.1672	1.06146	4.95688	18.9753
13.5	28.2866	31.3907	25.5474	6.35728	6.93344	19.9643
13.6	18.8527	25.9209	26.8064	5.29437	4.9412	0
13.7	33.5841	33.9997	23.0108	8.42194	15.7387	5.23013
13.8	6.71592	29.9157	16.9882	4.22208	6.89791	6.27812
13.9	12.0822	27.1592	29.0451	5.27204	6.89451	9.40242
14	26.8673	31.2161	26.5893	1.05219	17.7148	4.1684
	#DIV/0!	#DIV/0!	#DIV/0!	#DIV/0!	#DIV/0!	#DIV/0!
