# Supplementary material for: RECKLEEN: a lambda Red/CRISPR-Cas9 based single plasmid platform for fast, efficient, markerless, and scarless genome editing in Klebsiella pneumoniae
Source: Research Square preprint supplement (doi:10.21203/rs.3.rs-5859838/v1), 2025-02-28
Supplement: Supplementary file 22 [file integration_OD_experiment1.xlsx]

## Sheet: Sheet1
time (h)	blank1	blank2	blank3	WT1	WT2	WT3	rpsB1	rpsB2	rpsB3	rplS1	rplS2	rplS3	rpoS1	rpoS2	rpoS3
0	0.0806	0.0884	0.0884	0.097	0.0937	0.0955	0.1024	0.103	0.1023	0.094	0.0976	0.0984	0.1014	0.1005	0.1033
0.1	0.0804	0.0879	0.0878	0.0969	0.094	0.0951	0.1019	0.1031	0.1016	0.0972	0.0967	0.0972	0.1006	0.1005	0.1025
0.2	0.0807	0.0882	0.0879	0.096	0.0941	0.0955	0.1026	0.1038	0.1016	0.0969	0.0966	0.0979	0.101	0.1008	0.1023
0.3	0.0809	0.088	0.088	0.096	0.0949	0.0955	0.1027	0.1037	0.1019	0.0968	0.0974	0.0979	0.1012	0.1004	0.1022
0.4	0.0809	0.0878	0.0878	0.0964	0.0953	0.0958	0.1034	0.1041	0.1028	0.0975	0.0975	0.0987	0.1002	0.1014	0.1023
0.5	0.0807	0.0877	0.0879	0.0973	0.096	0.0961	0.1045	0.105	0.1036	0.098	0.0986	0.0994	0.1006	0.1021	0.1022
0.6	0.0809	0.0877	0.0879	0.0971	0.0969	0.0967	0.1058	0.1062	0.1042	0.0994	0.099	0.0998	0.1018	0.1029	0.1026
0.7	0.0816	0.0877	0.088	0.098	0.097	0.0975	0.1071	0.1073	0.1058	0.1003	0.1004	0.1034	0.1029	0.1033	0.1044
0.8	0.0816	0.0877	0.0881	0.0984	0.0973	0.098	0.1077	0.1082	0.1066	0.1007	0.1011	0.1024	0.1034	0.1039	0.1049
0.9	0.0814	0.0877	0.0879	0.0992	0.0988	0.0988	0.1091	0.1093	0.108	0.1029	0.1031	0.104	0.1039	0.1045	0.1054
1	0.0808	0.0877	0.0877	0.1002	0.0995	0.0999	0.1116	0.1113	0.1094	0.104	0.105	0.1064	0.105	0.1051	0.106
1.1	0.081	0.0877	0.0878	0.1014	0.1004	0.1011	0.114	0.1142	0.1116	0.1065	0.1075	0.1089	0.106	0.1062	0.1069
1.2	0.081	0.0877	0.0879	0.102	0.1022	0.1027	0.1181	0.117	0.1143	0.1096	0.1109	0.1118	0.1075	0.1078	0.1084
1.3	0.0808	0.0877	0.088	0.1041	0.1047	0.104	0.1218	0.1214	0.1179	0.1125	0.1154	0.1158	0.1089	0.1088	0.1106
1.4	0.081	0.0877	0.0879	0.1061	0.1066	0.1063	0.1259	0.1263	0.1226	0.1177	0.1197	0.1205	0.1104	0.1106	0.1118
1.5	0.0807	0.0877	0.0879	0.1078	0.1096	0.1092	0.1327	0.1327	0.127	0.1226	0.1252	0.127	0.1122	0.1134	0.1287
1.6	0.0816	0.0877	0.0883	0.1112	0.1131	0.1125	0.1401	0.1405	0.135	0.1288	0.1333	0.1331	0.1151	0.1164	0.1346
1.7	0.0806	0.0877	0.0879	0.1142	0.1174	0.1171	0.1504	0.149	0.1416	0.1366	0.1423	0.1437	0.1193	0.12	0.1392
1.8	0.0811	0.0877	0.0881	0.1192	0.1221	0.1214	0.1576	0.1602	0.1526	0.1458	0.1538	0.1524	0.1224	0.1243	0.143
1.9	0.0809	0.0877	0.0878	0.1232	0.128	0.1268	0.1705	0.171	0.1628	0.1563	0.1665	0.1642	0.1269	0.1285	0.148
2	0.0812	0.0877	0.0876	0.1294	0.1334	0.1328	0.1818	0.1831	0.1724	0.1683	0.1829	0.1789	0.1316	0.1343	0.1532
2.1	0.0813	0.0877	0.0879	0.1352	0.1421	0.1405	0.1947	0.1969	0.1892	0.1846	0.2022	0.1945	0.1398	0.1408	0.1625
2.2	0.0806	0.0877	0.0878	0.1428	0.1525	0.1495	0.21	0.2131	0.2024	0.2029	0.2225	0.2105	0.1461	0.1499	0.1703
2.3	0.0814	0.0877	0.0879	0.1524	0.1622	0.1577	0.2287	0.2309	0.2203	0.2218	0.243	0.2307	0.1546	0.1577	0.1808
2.4	0.0809	0.0877	0.0877	0.1624	0.1739	0.1695	0.2451	0.2481	0.2393	0.2449	0.267	0.2507	0.1639	0.1681	0.1898
2.5	0.0813	0.0877	0.0878	0.1751	0.1892	0.1826	0.2657	0.2698	0.2582	0.266	0.2942	0.2703	0.1763	0.1804	0.2025
2.6	0.0807	0.0877	0.0878	0.1897	0.2042	0.1972	0.2851	0.2907	0.281	0.2974	0.3139	0.2914	0.1872	0.1937	0.2161
2.7	0.0812	0.0877	0.0878	0.2061	0.2218	0.2135	0.3048	0.3115	0.2994	0.318	0.3451	0.314	0.2026	0.2087	0.2304
2.8	0.0808	0.0877	0.0877	0.2255	0.2393	0.2303	0.3244	0.331	0.3208	0.3394	0.3698	0.3371	0.2168	0.2233	0.246
2.9	0.0817	0.0877	0.0878	0.246	0.2598	0.2498	0.3465	0.3541	0.3457	0.3649	0.3953	0.364	0.2343	0.2403	0.264
3	0.0809	0.0877	0.0878	0.2646	0.2762	0.2661	0.3686	0.3764	0.3665	0.3856	0.4164	0.3862	0.2527	0.2608	0.2777
3.1	0.0803	0.0877	0.0878	0.2855	0.2949	0.2838	0.3931	0.4018	0.3921	0.4033	0.4399	0.408	0.2731	0.2783	0.2953
3.2	0.0808	0.0877	0.0878	0.3065	0.3134	0.3035	0.4192	0.4286	0.421	0.4211	0.4614	0.4283	0.2958	0.3015	0.3142
3.3	0.0809	0.0877	0.0881	0.3305	0.3347	0.3207	0.4414	0.4535	0.4439	0.4368	0.4867	0.4507	0.3181	0.3235	0.3274
3.4	0.0817	0.0877	0.0879	0.355	0.3559	0.3405	0.4671	0.4783	0.469	0.453	0.5097	0.4749	0.3405	0.3429	0.3428
3.5	0.0813	0.0877	0.0878	0.378	0.3738	0.3594	0.494	0.5046	0.4971	0.4657	0.5279	0.4945	0.3646	0.3648	0.3576
3.6	0.0816	0.0877	0.0877	0.4054	0.3956	0.3793	0.5164	0.5286	0.5262	0.4778	0.5466	0.5144	0.3903	0.3866	0.3739
3.7	0.0818	0.0877	0.0876	0.4289	0.4149	0.4	0.5402	0.5533	0.5503	0.4886	0.5647	0.5311	0.4144	0.4082	0.3868
3.8	0.0816	0.0877	0.0877	0.4477	0.433	0.4217	0.5575	0.5709	0.573	0.4998	0.5779	0.547	0.4403	0.431	0.4054
3.9	0.0815	0.0877	0.0876	0.4648	0.4499	0.4416	0.5771	0.5893	0.5892	0.5095	0.5928	0.5606	0.4668	0.4543	0.4199
4	0.0811	0.0877	0.0879	0.4789	0.4681	0.4653	0.5931	0.6069	0.6074	0.5161	0.6005	0.5793	0.4874	0.4771	0.4354
4.1	0.0812	0.0877	0.088	0.488	0.4822	0.4836	0.6124	0.6227	0.6305	0.5284	0.6174	0.5893	0.5111	0.4998	0.4542
4.2	0.0817	0.0877	0.0877	0.5008	0.4974	0.5038	0.6315	0.6397	0.6484	0.5411	0.6257	0.6021	0.5309	0.5199	0.4673
4.3	0.0818	0.0877	0.0878	0.5078	0.5191	0.5178	0.6434	0.6526	0.6714	0.5513	0.6332	0.6119	0.5538	0.5442	0.4855
4.4	0.0811	0.0877	0.0877	0.522	0.5286	0.5342	0.6634	0.6661	0.6915	0.5587	0.6441	0.6241	0.5725	0.5627	0.5009
4.5	0.0813	0.0877	0.0879	0.531	0.5465	0.5407	0.6781	0.6795	0.7057	0.5661	0.6519	0.6307	0.591	0.5826	0.5167
4.6	0.0811	0.0877	0.0877	0.5438	0.5542	0.5535	0.6912	0.6914	0.7207	0.5839	0.6564	0.6435	0.6049	0.598	0.53
4.7	0.0817	0.0877	0.0879	0.5558	0.569	0.5651	0.7066	0.7038	0.7366	0.5847	0.6694	0.6502	0.6227	0.6143	0.5483
4.8	0.0819	0.0877	0.088	0.5629	0.5764	0.5723	0.7177	0.7156	0.7475	0.5928	0.6757	0.6675	0.6366	0.6273	0.5661
4.9	0.0816	0.0877	0.0878	0.5744	0.5866	0.5826	0.7274	0.729	0.7598	0.6008	0.6832	0.6771	0.6442	0.6391	0.5793
5	0.0818	0.0877	0.0878	0.5821	0.5953	0.5919	0.7405	0.742	0.7733	0.612	0.6867	0.6838	0.6569	0.6519	0.5908
5.1	0.0817	0.0877	0.0879	0.5888	0.5995	0.5977	0.7495	0.7493	0.7794	0.6128	0.6916	0.6883	0.6653	0.6594	0.6036
5.2	0.082	0.0877	0.0879	0.594	0.6121	0.6089	0.7602	0.7608	0.7889	0.6221	0.701	0.6993	0.6692	0.6672	0.6126
5.3	0.0816	0.0877	0.0878	0.6006	0.6178	0.6171	0.7681	0.7689	0.801	0.6273	0.7094	0.7056	0.6746	0.6737	0.626
5.4	0.0819	0.0877	0.0879	0.6087	0.624	0.623	0.7768	0.778	0.8074	0.6326	0.7131	0.7132	0.6791	0.6821	0.6359
5.5	0.0814	0.0877	0.0879	0.6161	0.6346	0.636	0.7862	0.7873	0.8212	0.6407	0.7189	0.7179	0.6852	0.69	0.6466
5.6	0.0815	0.0877	0.0879	0.6303	0.6425	0.6459	0.7915	0.7952	0.8284	0.6457	0.7274	0.7261	0.6904	0.6978	0.6582
5.7	0.0817	0.0877	0.088	0.631	0.6493	0.6541	0.8023	0.8035	0.836	0.6523	0.7343	0.7331	0.6992	0.7061	0.6704
5.8	0.0817	0.0877	0.0879	0.6363	0.655	0.6592	0.8081	0.8109	0.846	0.6584	0.7386	0.7394	0.7045	0.7125	0.6805
5.9	0.0814	0.0877	0.0876	0.6423	0.6644	0.6675	0.8173	0.8189	0.8523	0.6607	0.7453	0.7481	0.7112	0.7218	0.6901
6	0.0814	0.0877	0.0878	0.6481	0.6681	0.672	0.8215	0.8243	0.8618	0.6736	0.7468	0.7523	0.717	0.7283	0.7023
6.1	0.0815	0.0877	0.0877	0.6549	0.6749	0.6785	0.8287	0.8325	0.8691	0.6759	0.7508	0.7594	0.7251	0.7373	0.7118
6.2	0.0819	0.0877	0.0879	0.6619	0.6823	0.6851	0.8329	0.8361	0.8751	0.6786	0.7599	0.7611	0.731	0.7426	0.7206
6.3	0.0814	0.0877	0.0877	0.6664	0.6861	0.6919	0.8415	0.8445	0.8829	0.6834	0.7625	0.7693	0.7406	0.7517	0.7305
6.4	0.0809	0.0877	0.0878	0.6731	0.6934	0.7011	0.8499	0.8499	0.8901	0.6809	0.7652	0.786	0.7483	0.7595	0.7392
6.5	0.0815	0.0877	0.0878	0.6794	0.7013	0.7101	0.8544	0.856	0.8983	0.6973	0.7714	0.7967	0.7548	0.7663	0.7489
6.6	0.0814	0.0877	0.0879	0.6826	0.7057	0.7149	0.8607	0.8631	0.9026	0.6973	0.7755	0.7886	0.7604	0.7728	0.755
6.7	0.081	0.0877	0.0879	0.6904	0.7094	0.7192	0.8677	0.8699	0.9103	0.6997	0.7834	0.7914	0.7681	0.7805	0.7629
6.8	0.0816	0.0877	0.0876	0.6929	0.7119	0.7213	0.8699	0.8722	0.9116	0.7036	0.7885	0.7899	0.7717	0.7835	0.7697
6.9	0.0813	0.0877	0.0878	0.6985	0.7152	0.7305	0.8769	0.8776	0.9201	0.7127	0.7845	0.8008	0.78	0.7902	0.7773
7	0.081	0.0877	0.0877	0.7028	0.7139	0.7336	0.8755	0.879	0.919	0.7138	0.786	0.8023	0.7792	0.7929	0.7824
7.1	0.081	0.0877	0.0879	0.7071	0.7191	0.737	0.8836	0.8849	0.9255	0.7179	0.7887	0.8094	0.7888	0.7991	0.7884
7.2	0.0818	0.0877	0.0879	0.7124	0.7248	0.7441	0.8882	0.8899	0.9326	0.7214	0.7933	0.8184	0.7926	0.8044	0.7965
7.3	0.0816	0.0877	0.0877	0.7166	0.7266	0.7462	0.8899	0.8924	0.9337	0.723	0.794	0.818	0.7966	0.8084	0.8011
7.4	0.0811	0.0877	0.0878	0.7193	0.7313	0.7518	0.8931	0.8946	0.9366	0.7271	0.7975	0.8185	0.8016	0.8114	0.8079
7.5	0.0817	0.0877	0.0878	0.7228	0.7373	0.7566	0.8954	0.8984	0.9412	0.7316	0.7995	0.8225	0.8047	0.816	0.8137
7.6	0.0815	0.0877	0.0878	0.724	0.7373	0.7574	0.8989	0.9005	0.9425	0.7329	0.8008	0.8251	0.8085	0.8192	0.8187
7.7	0.0818	0.0877	0.0878	0.7297	0.7409	0.765	0.9055	0.904	0.9474	0.7386	0.8034	0.8275	0.8177	0.8238	0.8232
7.8	0.0813	0.0877	0.0876	0.7334	0.7448	0.7678	0.9068	0.9085	0.9544	0.7421	0.807	0.8317	0.822	0.83	0.8307
7.9	0.0816	0.0877	0.088	0.7365	0.7483	0.774	0.9109	0.9134	0.9613	0.7482	0.8117	0.8387	0.8277	0.8358	0.838
8	0.0814	0.0877	0.0878	0.7384	0.7507	0.7753	0.9126	0.9153	0.9609	0.7499	0.8129	0.84	0.8307	0.839	0.8411
8.1	0.0811	0.0877	0.0877	0.7397	0.7491	0.778	0.9179	0.918	0.963	0.753	0.8139	0.8402	0.8366	0.8429	0.8444
8.2	0.0811	0.0877	0.088	0.7434	0.752	0.7825	0.9174	0.9209	0.9673	0.7548	0.8147	0.843	0.8382	0.8456	0.8488
8.3	0.0815	0.0877	0.0877	0.7471	0.7549	0.7861	0.9232	0.9251	0.9726	0.758	0.8176	0.8517	0.8453	0.8502	0.8536
8.4	0.0809	0.0877	0.0877	0.748	0.7573	0.7886	0.9233	0.9256	0.9722	0.7601	0.819	0.8497	0.8459	0.8516	0.8575
8.5	0.0813	0.0877	0.0877	0.75	0.7585	0.7909	0.9254	0.9286	0.9755	0.7632	0.8197	0.8522	0.849	0.8558	0.8605
8.6	0.0818	0.0877	0.088	0.7525	0.7587	0.7952	0.9287	0.9325	0.9813	0.768	0.8223	0.8563	0.8513	0.8586	0.8658
8.7	0.0812	0.0877	0.0877	0.754	0.761	0.7975	0.9305	0.9336	0.9803	0.7686	0.823	0.8578	0.8549	0.8599	0.8671
8.8	0.081	0.0877	0.0878	0.7571	0.7622	0.8034	0.9355	0.9382	0.9868	0.7712	0.8257	0.8596	0.8604	0.8652	0.8718
8.9	0.0811	0.0877	0.0877	0.7596	0.7661	0.8062	0.9363	0.9393	0.9905	0.7732	0.8293	0.8628	0.8629	0.8673	0.8772
9	0.0815	0.0877	0.0877	0.7619	0.766	0.8106	0.9397	0.9426	0.9924	0.7761	0.8298	0.8651	0.8668	0.8705	0.8785
9.1	0.0811	0.0877	0.0878	0.7639	0.7668	0.8125	0.9416	0.9442	0.9939	0.7766	0.8297	0.8657	0.8703	0.8727	0.881
9.2	0.0817	0.0877	0.0878	0.7655	0.7697	0.8159	0.9429	0.9454	0.9951	0.7783	0.8321	0.8686	0.8709	0.8737	0.8839
9.3	0.0812	0.0877	0.0877	0.7682	0.77	0.8185	0.9445	0.9494	0.999	0.7802	0.8333	0.8703	0.8737	0.878	0.8879
9.4	0.0815	0.0877	0.0879	0.7691	0.7726	0.8233	0.9475	0.9512	1.0054	0.7836	0.8354	0.8729	0.8775	0.8798	0.8949
9.5	0.0809	0.0877	0.0878	0.7712	0.7762	0.8269	0.9516	0.9537	1.0059	0.786	0.8392	0.8752	0.8823	0.8824	0.8953
9.6	0.0811	0.0877	0.0879	0.7748	0.7753	0.8301	0.9517	0.9564	1.0111	0.7874	0.8372	0.8773	0.8838	0.8851	0.8995
9.7	0.0811	0.0877	0.0876	0.7758	0.7778	0.8335	0.9557	0.9583	1.0127	0.7886	0.8397	0.8794	0.889	0.8873	0.9023
9.8	0.0811	0.0877	0.0878	0.7784	0.779	0.8369	0.957	0.9614	1.0157	0.7885	0.8403	0.8817	0.8909	0.8909	0.905
9.9	0.0817	0.0877	0.0878	0.7797	0.7807	0.8405	0.9584	0.9637	1.0183	0.7929	0.8438	0.8853	0.8921	0.8925	0.9089
10	0.0812	0.0877	0.0878	0.7818	0.7834	0.8428	0.9588	0.9647	1.0185	0.7924	0.846	0.8862	0.8941	0.8931	0.9106
10.1	0.0815	0.0877	0.0877	0.7848	0.7856	0.8488	0.9663	0.9687	1.027	0.7959	0.8574	0.8916	0.9015	0.898	0.9163
10.2	0.0811	0.0877	0.088	0.7859	0.7863	0.8498	0.9668	0.9712	1.0284	0.7977	0.8509	0.8927	0.9037	0.9003	0.9195
10.3	0.081	0.0877	0.0882	0.7877	0.7881	0.8539	0.9687	0.9736	1.0323	0.7985	0.8509	0.8955	0.906	0.9032	0.9225
10.4	0.0814	0.0877	0.0878	0.7894	0.7898	0.8543	0.9669	0.9736	1.0323	0.8002	0.852	0.8953	0.904	0.903	0.9237
10.5	0.0808	0.0877	0.0877	0.7899	0.7898	0.8549	0.9686	0.9754	1.032	0.8027	0.853	0.8946	0.9055	0.9034	0.9245
10.6	0.0814	0.0877	0.088	0.7933	0.7931	0.8621	0.9752	0.9793	1.0399	0.8065	0.8574	0.9006	0.9126	0.9082	0.93
10.7	0.0813	0.0877	0.088	0.7934	0.793	0.8619	0.9733	0.981	1.0405	0.8069	0.8582	0.8986	0.9113	0.9089	0.9322
10.8	0.0815	0.0877	0.0879	0.7961	0.7949	0.8661	0.9782	0.9838	1.043	0.8087	0.8623	0.9046	0.9175	0.9126	0.9342
10.9	0.081	0.0877	0.0879	0.7956	0.7959	0.8665	0.9773	0.9845	1.046	0.8099	0.8848	0.9033	0.9163	0.9126	0.9376
11	0.081	0.0877	0.0878	0.7979	0.7969	0.8687	0.9785	0.9875	1.0485	0.8116	0.8949	0.9055	0.9169	0.9164	0.94
11.1	0.0813	0.0877	0.0878	0.7988	0.7993	0.8715	0.9832	0.9897	1.0508	0.8133	0.8669	0.908	0.9239	0.9179	0.9421
11.2	0.0812	0.0877	0.0879	0.8004	0.7998	0.8731	0.9845	0.991	1.0539	0.8159	0.8864	0.9116	0.9252	0.9194	0.9455
11.3	0.0811	0.0877	0.0879	0.8019	0.8013	0.8736	0.9838	0.9926	1.054	0.8173	0.8714	0.9084	0.9246	0.9202	0.9459
11.4	0.0816	0.0877	0.0879	0.8034	0.8015	0.8772	0.9881	0.9962	1.0594	0.8181	0.8726	0.9137	0.9299	0.9237	0.9508
11.5	0.0812	0.0877	0.0878	0.8054	0.804	0.8821	0.9913	0.9984	1.0653	0.8224	0.8707	0.9143	0.9342	0.9255	0.9557
11.6	0.0812	0.0877	0.0878	0.8054	0.8044	0.879	0.9897	0.999	1.0614	0.8233	0.8765	0.911	0.9321	0.9267	0.9543
11.7	0.0813	0.0877	0.088	0.8078	0.8066	0.8843	0.9947	1.0042	1.0687	0.8267	0.8751	0.923	0.9376	0.9312	0.96
11.8	0.081	0.0877	0.0879	0.8081	0.8061	0.8828	0.9934	1.0032	1.0661	0.8308	0.8766	0.9191	0.9368	0.9308	0.9597
11.9	0.081	0.0877	0.0879	0.8089	0.8078	0.8844	0.995	1.0056	1.0683	0.8334	0.8868	0.9136	0.9377	0.9325	0.9625
12	0.0812	0.0877	0.088	0.8101	0.8079	0.8859	0.997	1.0079	1.0691	0.8224	0.8801	0.9156	0.9397	0.9339	0.9645
12.1	0.0813	0.0877	0.0879	0.8103	0.8085	0.8866	0.9993	1.0114	1.0714	0.8234	0.8847	0.9159	0.9435	0.9363	0.9668
12.2	0.0817	0.0877	0.0878	0.813	0.8116	0.8916	1.0031	1.0153	1.0807	0.8299	0.8944	0.9203	0.9481	0.9409	0.9732
12.3	0.0818	0.0877	0.0879	0.8135	0.811	0.893	1.0047	1.0169	1.0797	0.8308	0.8902	0.9284	0.9485	0.9423	0.9744
12.4	0.0813	0.0877	0.0878	0.8136	0.8129	0.892	1.0054	1.0184	1.0793	0.8351	0.8938	0.9242	0.9494	0.9424	0.9758
12.5	0.0813	0.0877	0.0879	0.8146	0.8131	0.8956	1.0091	1.02	1.0826	0.8377	0.8957	0.9226	0.9547	0.9462	0.9788
12.6	0.0811	0.0877	0.0878	0.816	0.8141	0.8973	1.0119	1.0225	1.0846	0.8407	0.8917	0.9223	0.9575	0.9472	0.9816
12.7	0.0807	0.0877	0.0879	0.8162	0.8165	0.8982	1.0106	1.0247	1.0861	0.8382	0.8935	0.926	0.9566	0.9492	0.9841
12.8	0.081	0.0877	0.0881	0.8187	0.8172	0.9025	1.016	1.0283	1.0932	0.8369	0.8977	0.9331	0.9623	0.9533	0.9887
12.9	0.0812	0.0877	0.0879	0.8187	0.8162	0.9006	1.0137	1.0279	1.0891	0.8404	0.8967	0.9336	0.9604	0.9528	0.9885
13	0.0812	0.0877	0.0878	0.8191	0.8169	0.9025	1.018	1.0299	1.0915	0.8424	0.8946	0.9282	0.9649	0.9551	0.9909
13.1	0.081	0.0877	0.088	0.8204	0.8197	0.9048	1.0175	1.0318	1.0924	0.8448	0.9012	0.9345	0.9648	0.9567	0.9922
13.2	0.081	0.0877	0.0878	0.8207	0.8212	0.9065	1.0208	1.0343	1.0954	0.8454	0.9	0.9303	0.9681	0.9586	0.9952
13.3	0.0813	0.0877	0.0881	0.8213	0.8223	0.9069	1.0199	1.0338	1.0955	0.8457	0.9025	0.9275	0.9671	0.959	0.9967
13.4	0.0808	0.0877	0.0877	0.8227	0.8203	0.9072	1.023	1.036	1.0983	0.8441	0.9023	0.9341	0.9721	0.962	0.9986
13.5	0.081	0.0877	0.0879	0.8234	0.8218	0.9099	1.0249	1.0393	1.099	0.844	0.9022	0.9371	0.9732	0.964	1.0004
13.6	0.0813	0.0877	0.088	0.8239	0.822	0.9087	1.0258	1.0402	1.1012	0.8483	0.9058	0.9384	0.9752	0.9663	1.0029
13.7	0.0808	0.0877	0.0877	0.8252	0.8243	0.9134	1.0308	1.0434	1.1059	0.8546	0.9027	0.9503	0.9818	0.9696	1.0055
13.8	0.0808	0.0877	0.088	0.8253	0.8244	0.9121	1.0283	1.0434	1.1041	0.8494	0.9043	0.9388	0.9795	0.9693	1.006
13.9	0.0809	0.0877	0.088	0.8258	0.8257	0.9143	1.0294	1.0449	1.1049	0.8485	0.9051	0.9428	0.9802	0.9707	1.0082
14	0.081	0.0877	0.0878	0.8254	0.826	0.9152	1.0315	1.0471	1.1056	0.8493	0.904	0.9418	0.982	0.9728	1.0087

## Sheet: Sheet2
time (h)	blank1	blank2	blank3	WT1	WT2	WT3	rpsB1	rpsB2	rpsB3	rplS1	rplS2	rplS3	rpoS1	rpoS2	rpoS3
0	35	27	43	37	25	27	49	50	51	35	35	30	38	28	31
0.1	38	31	41	38	30	27	49	50	48	45	37	39	37	33	33
0.2	32	26	36	42	36	27	55	49	51	35	35	33	26	24	36
0.3	42	23	36	32	28	25	55	65	51	39	36	38	37	32	29
0.4	33	31	42	42	32	27	50	50	51	36	36	33	30	34	33
0.5	39	31	43	28	27	29	54	50	48	35	38	35	34	30	38
0.6	34	35	39	37	34	28	55	49	51	34	34	34	34	30	33
0.7	38	19	33	31	29	35	55	65	51	42	39	42	32	33	26
0.8	29	31	29	33	34	26	49	50	51	44	39	39	36	26	22
0.9	34	26	32	38	40	28	54	53	48	45	44	42	26	24	36
1	39	30	30	30	29	31	55	49	51	44	41	40	37	32	29
1.1	33	28	34	35	30	27	55	65	51	42	42	44	30	25	21
1.2	35	28	34	31	23	24	54	57	57	44	45	45	34	30	28
1.3	38	27	40	29	25	29	66	71	63	44	46	47	34	30	33
1.4	31	23	38	33	34	33	77	74	81	44	42	43	36	26	22
1.5	29	37	34	35	33	29	68	72	76	47	48	44	26	24	36
1.6	37	30	36	29	30	29	74	86	80	52	50	48	37	32	29
1.7	30	22	33	36	27	32	84	89	76	54	55	50	30	25	21
1.8	35	29	31	35	24	28	77	94	95	58	60	55	34	30	28
1.9	35	34	41	37	32	26	99	115	108	66	70	72	34	30	33
2	31	31	42	28	30	31	126	120	120	88	90	90	34	26	30
2.1	30	22	33	28	28	32	119	134	131	110	113	100	32	25	21
2.2	35	23	39	31	28	22	139	151	151	119	115	120	42	30	22
2.3	28	35	36	27	25	24	166	174	170	140	135	150	36	23	34
2.4	32	31	34	36	31	23	179	200	190	155	180	170	32	27	30
2.5	31	30	31	34	27	35	200	212	212	190	188	193	32	26	29
2.6	31	25	36	27	33	25	237	241	243	200	210	215	32	26	24
2.7	30	27	32	30	29	27	254	260	262	243	235	240	36	25	26
2.8	28	22	33	32	30	32	272	277	283	269	273	270	27	23	21
2.9	32	36	27	33	30	29	311	303	310	313	315	310	32	29	32
3	35	23	34	29	29	33	343	351	343	345	355	350	33	34	25
3.1	35	25	29	34	29	32	376	382	373	390	388	390	24	33	32
3.2	34	26	29	35	24	22	443	446	423	420	400	430	39	27	28
3.3	26	20	33	33	26	24	442	501	440	460	488	487	34	25	33
3.4	36	24	40	34	27	30	500	591	500	530	550	535	39	35	32
3.5	34	33	35	37	28	26	549	594	542	580	600	596	35	36	30
3.6	34	20	33	40	30	29	599	581	610	643	640	630	41	28	32
3.7	36	29	31	37	36	42	657	662	636	710	699	700	45	34	27
3.8	38	28	33	46	38	34	697	674	685	745	777	741	39	33	35
3.9	41	28	29	42	40	40	746	705	711	788	800	793	42	35	40
4	36	26	31	56	48	47	788	758	740	883	855	850	40	27	30
4.1	36	30	29	53	54	50	817	809	811	952	947	896	42	27	25
4.2	30	27	35	61	55	54	911	861	829	1007	958	935	35	26	25
4.3	33	30	34	67	49	46	920	920	853	1039	1008	1023	31	30	33
4.4	34	27	34	61	60	53	951	948	896	1083	1062	1059	33	24	26
4.5	32	26	37	61	62	65	1006	959	935	1166	1101	1089	33	28	28
4.6	29	26	33	66	63	57	1038	1009	1023	1172	1198	1117	38	23	28
4.7	32	31	32	65	62	64	1082	1063	1059	1229	1229	1194	34	36	29
4.8	33	26	31	66	61	62	1165	1102	1089	1303	1236	1208	39	29	32
4.9	35	34	34	63	69	65	1171	1199	1117	1358	1343	1252	40	24	21
5	32	29	34	60	62	62	1228	1230	1194	1414	1355	1352	38	33	28
5.1	31	30	33	65	64	65	1302	1237	1208	1430	1411	1378	35	27	21
5.2	35	27	38	58	65	62	1357	1344	1252	1478	1494	1457	40	28	26
5.3	31	23	37	68	72	59	1413	1356	1352	1550	1532	1491	37	31	32
5.4	36	32	31	69	60	68	1429	1412	1378	1600	1620	1550	44	32	35
5.5	32	32	32	54	71	54	1477	1495	1457	1647	1601	1595	44	41	39
5.6	38	28	34	67	56	66	1549	1533	1491	1777	1727	1644	47	42	42
5.7	29	27	32	55	65	59	1599	1621	1550	1787	1731	1720	50	43	44
5.8	33	21	31	53	57	59	1646	1602	1595	1861	1796	1732	54	43	46
5.9	37	32	36	60	64	55	1776	1728	1644	1897	1853	1805	56	50	47
6	27	29	31	56	56	67	1786	1732	1720	1929	1865	1843	58	54	49
6.1	31	26	40	60	61	55	1860	1797	1732	1976	1926	1859	59	54	52
6.2	30	33	33	68	55	50	1896	1854	1805	2008	1941	1968	65	59	55
6.3	29	27	40	52	54	51	1928	1866	1843	2049	2003	1973	66	59	56
6.4	35	19	33	57	55	59	1975	1927	1859	2166	2065	2076	69	61	60
6.5	37	29	30	56	55	48	2007	1942	1968	2121	2111	2082	74	64	68
6.6	37	26	31	53	57	54	2048	2004	1973	2256	2207	2115	77	70	71
6.7	31	26	35	55	57	51	2165	2066	2076	2274	2210	2151	77	71	71
6.8	35	34	29	53	48	44	2120	2112	2082	2315	2242	2228	77	78	80
6.9	31	29	34	48	51	49	2255	2208	2115	2326	2315	2253	85	84	82
7	30	25	33	49	49	45	2273	2211	2151	2381	2351	2322	87	81	85
7.1	28	33	34	49	60	53	2314	2243	2228	2440	2373	2418	93	89	89
7.2	38	26	28	62	48	49	2325	2316	2253	2448	2388	2443	95	90	90
7.3	28	21	24	51	51	45	2380	2352	2322	2562	2466	2433	103	93	96
7.4	31	21	31	48	43	46	2439	2374	2418	2558	2510	2445	118	104	100
7.5	25	27	36	54	48	47	2447	2389	2443	2629	2594	2507	118	107	120
7.6	32	22	26	48	47	48	2561	2467	2433	2670	2566	2545	113	113	110
7.7	33	26	41	56	48	50	2557	2511	2445	2665	2653	2560	134	115	111
7.8	34	19	31	51	53	48	2628	2595	2507	2673	2577	2630	130	131	130
7.9	32	18	28	53	49	44	2669	2567	2545	2693	2666	2674	130	136	128
8	34	27	31	53	49	48	2664	2654	2560	2737	2671	2663	139	129	130
8.1	30	23	32	53	49	46	2672	2578	2630	2779	2716	2737	135	131	141
8.2	27	28	34	49	39	53	2692	2667	2674	2818	2769	2719	148	138	154
8.3	21	22	24	55	50	48	2736	2672	2663	2923	2770	2722	153	147	140
8.4	27	19	33	61	47	46	2778	2717	2737	2845	2821	2786	157	147	166
8.5	29	24	30	43	55	53	2817	2770	2719	2936	2810	2781	165	157	166
8.6	25	26	33	49	50	48	2922	2771	2722	2962	2865	2871	173	170	167
8.7	28	23	33	54	52	51	2844	2822	2786	2895	2904	2826	186	173	187
8.8	35	28	35	60	52	49	2935	2811	2781	2983	2885	2898	184	169	178
8.9	31	28	31	46	56	54	2961	2866	2871	3001	2932	2882	204	183	203
9	28	25	33	51	46	46	2894	2905	2826	2998	2913	2948	208	183	196
9.1	31	23	34	52	47	55	2982	2886	2898	2985	2937	2984	214	206	210
9.2	36	22	31	51	48	46	3000	2933	2882	3027	2981	2957	230	201	207
9.3	25	24	33	46	49	49	2997	2914	2948	3067	3003	2965	235	223	230
9.4	31	25	30	59	49	53	2984	2938	2984	3047	3007	3050	237	211	233
9.5	20	24	28	46	48	51	3026	2982	2957	3113	3012	3081	254	229	245
9.6	29	23	33	46	47	56	3066	3004	2965	3162	3060	3073	242	241	256
9.7	24	27	29	48	50	54	3046	3008	3050	3110	3056	3060	267	256	266
9.8	31	26	27	53	53	41	3112	3013	3081	3169	3038	3036	286	257	286
9.9	26	27	35	56	50	49	3161	3061	3073	3106	3126	3094	282	267	283
10	24	28	28	55	50	47	3109	3057	3060	3179	3073	3091	292	268	283
10.1	23	26	29	56	49	55	3168	3039	3036	3190	3106	3105	326	300	308
10.2	27	23	31	46	47	49	3105	3127	3094	3207	3146	3132	304	302	348
10.3	31	23	37	40	48	47	3178	3074	3091	3227	3148	3116	328	305	322
10.4	23	24	27	49	53	53	3189	3107	3105	3249	3207	3212	338	328	348
10.5	28	27	26	53	47	51	3206	3147	3132	3266	3146	3213	359	340	343
10.6	28	24	27	39	43	65	3226	3149	3116	3281	3207	3171	344	326	365
10.7	28	22	33	46	46	58	3248	3208	3212	3266	3209	3152	355	344	365
10.8	32	25	25	54	50	50	3265	3147	3213	3260	3200	3162	376	347	376
10.9	28	18	28	46	51	50	3280	3208	3171	3314	3259	3220	395	383	379
11	24	17	26	54	46	54	3265	3210	3152	3242	3223	3241	411	372	400
11.1	27	22	25	44	43	47	3259	3201	3162	3253	3255	3193	403	400	394
11.2	24	26	29	53	48	50	3313	3260	3220	3409	3267	3246	436	397	415
11.3	27	24	24	49	49	50	3241	3224	3241	3316	3290	3257	423	419	421
11.4	25	23	30	47	48	47	3252	3256	3193	3346	3320	3311	446	419	443
11.5	28	23	27	45	47	49	3408	3268	3246	3375	3305	3260	458	404	441
11.6	24	16	34	48	48	48	3315	3291	3257	3393	3273	3299	462	444	472
11.7	21	25	28	42	49	50	3345	3321	3311	3409	3354	3234	475	449	467
11.8	21	22	29	39	49	43	3374	3306	3260	3478	3357	3342	491	482	471
11.9	27	29	31	44	47	48	3392	3274	3299	3391	3359	3289	502	472	509
12	21	24	26	35	44	48	3408	3355	3234	3412	3406	3329	511	514	521
12.1	19	20	29	51	46	38	3477	3358	3342	3448	3374	3369	501	492	519
12.2	24	26	24	42	40	44	3390	3360	3289	3446	3392	3336	533	512	528
12.3	24	17	33	40	49	38	3411	3407	3329	3458	3410	3393	565	544	549
12.4	29	18	25	40	44	46	3447	3375	3369	3491	3391	3409	553	524	561
12.5	19	27	28	41	38	50	3445	3393	3336	3477	3405	3367	553	550	601
12.6	29	22	29	41	37	51	3457	3411	3393	3503	3413	3408	591	597	582
12.7	19	17	24	43	42	43	3490	3392	3409	3478	3526	3422	581	566	574
12.8	28	17	27	34	44	41	3476	3406	3367	3493	3422	3408	587	595	611
12.9	22	16	30	34	41	46	3502	3414	3408	3566	3415	3400	598	605	625
13	26	25	27	39	46	43	3477	3527	3422	3452	3441	3407	619	603	622
13.1	21	22	26	40	41	49	3492	3423	3408	3435	3409	3458	634	611	663
13.2	21	25	24	40	42	44	3565	3416	3400	3405	3371	3394	658	651	670
13.3	20	19	25	42	47	47	3451	3442	3407	3366	3365	3411	661	700	693
13.4	20	19	23	36	41	51	3434	3410	3458	3366	3353	3360	694	684	704
13.5	22	17	27	43	40	48	3500	3422	3502	3376	3395	3343	707	676	748
13.6	22	20	20	36	39	42	3471	3414	3432	3427	3340	3394	744	729	779
13.7	18	17	24	43	42	43	3435	3399	3479	3376	3377	3379	753	745	771
13.8	29	22	27	34	44	41	3464	3347	3448	3429	3408	3485	771	760	821
13.9	25	21	22	34	41	46	3420	3396	3402	3439	3419	3435	800	770	828
14	19	23	21	39	46	43	3428	3409	3485	3427	3441	3372	841	810	840
