# Supplementary material for: RECKLEEN: a lambda Red/CRISPR-Cas9 based single plasmid platform for fast, efficient, markerless, and scarless genome editing in Klebsiella pneumoniae
Source: Research Square preprint supplement (doi:10.21203/rs.3.rs-5859838/v1), 2025-02-28
Supplement: Supplementary file 25 [file integration_OD_experiment2.xlsx]

## Sheet: Sheet1
time (h)	blank4	blank5	blank6	WT4	WT5	WT6	rpsB4	rpsB5	rpsB6	rplS4	rplS5	rplS6	rpoS4	rpoS5	rpoS6
0	0.0872	0.0885	0.0899	0.1023	0.102	0.1033	0.0945	0.0973	0.0982	0.0972	0.0959	0.0949	0.0984	0.0995	0.1063
0.1	0.0865	0.0865	0.0889	0.1018	0.1013	0.1034	0.0977	0.0964	0.097	0.0971	0.0955	0.0945	0.0976	0.0995	0.1055
0.2	0.0864	0.0861	0.0898	0.1025	0.1013	0.1041	0.0974	0.0963	0.0977	0.0962	0.0959	0.0949	0.098	0.0998	0.1053
0.3	0.0874	0.0869	0.0882	0.1026	0.1016	0.104	0.0973	0.0971	0.0977	0.0962	0.0959	0.0949	0.0982	0.0994	0.1052
0.4	0.088	0.0884	0.0904	0.1033	0.1025	0.1044	0.098	0.0972	0.0985	0.0966	0.0962	0.0952	0.0972	0.1004	0.1053
0.5	0.0878	0.0879	0.0897	0.1044	0.1033	0.1053	0.0985	0.0983	0.0992	0.0975	0.0965	0.0955	0.0976	0.1011	0.1052
0.6	0.0866	0.0874	0.0879	0.1057	0.1039	0.1065	0.0999	0.0987	0.0996	0.0973	0.0971	0.0961	0.0988	0.1019	0.1056
0.7	0.0868	0.0875	0.0898	0.107	0.1055	0.1076	0.1008	0.1001	0.1032	0.0982	0.0979	0.0969	0.0999	0.1023	0.1074
0.8	0.0881	0.0874	0.0894	0.1076	0.1063	0.1085	0.1012	0.1008	0.1022	0.0986	0.0984	0.0974	0.1004	0.1029	0.1079
0.9	0.0871	0.0866	0.0887	0.109	0.1077	0.1096	0.1034	0.1028	0.1038	0.0994	0.0992	0.0982	0.1009	0.1035	0.1084
1	0.0866	0.0871	0.088	0.1115	0.1091	0.1116	0.1045	0.1047	0.1062	0.1004	0.1003	0.0993	0.102	0.1041	0.109
1.1	0.0887	0.0882	0.0885	0.1139	0.1113	0.1145	0.107	0.1072	0.1087	0.1016	0.1015	0.1005	0.103	0.1052	0.1099
1.2	0.0867	0.0863	0.0881	0.118	0.114	0.1173	0.1101	0.1106	0.1116	0.1022	0.1031	0.1021	0.1045	0.1068	0.1114
1.3	0.0878	0.0875	0.0885	0.1217	0.1176	0.1217	0.113	0.1151	0.1156	0.1043	0.1044	0.1034	0.1059	0.1078	0.1136
1.4	0.0876	0.0872	0.0881	0.1258	0.1223	0.1266	0.1182	0.1194	0.1203	0.1063	0.1067	0.1057	0.1074	0.1096	0.1148
1.5	0.0869	0.088	0.0892	0.1326	0.1267	0.133	0.1231	0.1249	0.1268	0.108	0.1096	0.1086	0.1092	0.1124	0.1317
1.6	0.0868	0.0861	0.0884	0.14	0.1347	0.1408	0.1293	0.133	0.1329	0.1114	0.1129	0.1119	0.1121	0.1154	0.1376
1.7	0.0868	0.0866	0.0885	0.1503	0.1413	0.1493	0.1371	0.142	0.1435	0.1144	0.1175	0.1165	0.1163	0.119	0.1422
1.8	0.0873	0.0859	0.0883	0.1575	0.1523	0.1605	0.1463	0.1535	0.1522	0.1194	0.1218	0.1208	0.1194	0.1233	0.146
1.9	0.0879	0.0873	0.0883	0.1704	0.1625	0.1713	0.1568	0.1662	0.164	0.1234	0.1272	0.1262	0.1239	0.1275	0.151
2	0.0879	0.0884	0.0891	0.1817	0.1721	0.1834	0.1688	0.1826	0.1787	0.1296	0.1332	0.1322	0.1286	0.1333	0.1562
2.1	0.086	0.0856	0.0871	0.1946	0.1889	0.1972	0.1851	0.2019	0.1943	0.1354	0.1409	0.1399	0.1368	0.1398	0.1655
2.2	0.0878	0.0882	0.0888	0.2099	0.2021	0.2134	0.2034	0.2222	0.2103	0.143	0.1499	0.1489	0.1431	0.1489	0.1733
2.3	0.0865	0.0864	0.0875	0.2286	0.22	0.2312	0.2223	0.2427	0.2305	0.1526	0.1581	0.1571	0.1516	0.1567	0.1838
2.4	0.0869	0.087	0.0887	0.245	0.239	0.2484	0.2454	0.2667	0.2505	0.1626	0.1699	0.1689	0.1609	0.1671	0.1928
2.5	0.0866	0.0859	0.0881	0.2656	0.2579	0.2701	0.2665	0.2939	0.2701	0.1753	0.183	0.182	0.1733	0.1794	0.2055
2.6	0.0847	0.0852	0.0868	0.285	0.2807	0.291	0.2979	0.3136	0.2912	0.1899	0.1976	0.1966	0.1842	0.1927	0.2191
2.7	0.087	0.0875	0.089	0.3047	0.2991	0.3118	0.3185	0.3448	0.3138	0.2063	0.2139	0.2129	0.1996	0.2077	0.2334
2.8	0.0865	0.0877	0.0882	0.3243	0.3205	0.3313	0.3399	0.3695	0.3369	0.2257	0.2307	0.2297	0.2138	0.2223	0.249
2.9	0.0849	0.0853	0.0878	0.3464	0.3454	0.3544	0.3654	0.395	0.3638	0.2462	0.2502	0.2492	0.2313	0.2393	0.267
3	0.0853	0.0866	0.0871	0.3685	0.3662	0.3767	0.3861	0.4161	0.386	0.2648	0.2665	0.2655	0.2497	0.2598	0.2807
3.1	0.0873	0.0864	0.0874	0.393	0.3918	0.4021	0.4038	0.4396	0.4078	0.2857	0.2842	0.2832	0.2701	0.2773	0.2983
3.2	0.0863	0.0861	0.0867	0.4191	0.4207	0.4289	0.4216	0.4611	0.4281	0.3067	0.3039	0.3029	0.2928	0.3005	0.3172
3.3	0.0871	0.0882	0.0884	0.4413	0.4436	0.4538	0.4373	0.4864	0.4505	0.3307	0.3211	0.3201	0.3151	0.3225	0.3304
3.4	0.0872	0.087	0.088	0.467	0.4687	0.4786	0.4535	0.5094	0.4747	0.3552	0.3409	0.3399	0.3375	0.3419	0.3458
3.5	0.0876	0.0878	0.0876	0.4939	0.4968	0.5049	0.4662	0.5276	0.4943	0.3782	0.3598	0.3588	0.3616	0.3638	0.3606
3.6	0.0879	0.0869	0.0886	0.5163	0.5259	0.5289	0.4783	0.5463	0.5142	0.4056	0.3797	0.3787	0.3873	0.3856	0.3769
3.7	0.0853	0.0861	0.0878	0.5401	0.55	0.5536	0.4891	0.5644	0.5309	0.4291	0.4004	0.3994	0.4114	0.4072	0.3898
3.8	0.0876	0.0869	0.0876	0.5574	0.5727	0.5712	0.5003	0.5776	0.5468	0.4479	0.4221	0.4211	0.4373	0.43	0.4084
3.9	0.0876	0.0871	0.0881	0.577	0.5889	0.5896	0.51	0.5925	0.5604	0.465	0.442	0.441	0.4638	0.4533	0.4229
4	0.0868	0.0869	0.0885	0.593	0.6071	0.6072	0.5166	0.6002	0.5791	0.4791	0.4657	0.4647	0.4844	0.4761	0.4384
4.1	0.0873	0.0882	0.0889	0.6123	0.6302	0.623	0.5289	0.6171	0.5891	0.4882	0.484	0.483	0.5081	0.4988	0.4572
4.2	0.0856	0.0877	0.0871	0.6314	0.6481	0.64	0.5416	0.6254	0.6019	0.501	0.5042	0.5032	0.5279	0.5189	0.4703
4.3	0.0865	0.0864	0.0886	0.6433	0.6711	0.6529	0.5518	0.6329	0.6117	0.508	0.5182	0.5172	0.5508	0.5432	0.4885
4.4	0.0849	0.0855	0.0865	0.6633	0.6912	0.6664	0.5592	0.6438	0.6239	0.5222	0.5346	0.5336	0.5695	0.5617	0.5039
4.5	0.0861	0.0862	0.0874	0.678	0.7054	0.6798	0.5666	0.6516	0.6305	0.5312	0.5411	0.5401	0.588	0.5816	0.5197
4.6	0.0868	0.088	0.0883	0.6911	0.7204	0.6917	0.5844	0.6561	0.6433	0.544	0.5539	0.5529	0.6019	0.597	0.533
4.7	0.0867	0.0876	0.0883	0.7065	0.7363	0.7041	0.5852	0.6691	0.65	0.556	0.5655	0.5645	0.6197	0.6133	0.5513
4.8	0.0868	0.087	0.0885	0.7176	0.7472	0.7159	0.5933	0.6754	0.6673	0.5631	0.5727	0.5717	0.6336	0.6263	0.5691
4.9	0.0862	0.0865	0.0877	0.7273	0.7595	0.7293	0.6013	0.6829	0.6769	0.5746	0.583	0.582	0.6412	0.6381	0.5823
5	0.0873	0.0869	0.0882	0.7404	0.773	0.7423	0.6125	0.6864	0.6836	0.5823	0.5923	0.5913	0.6539	0.6509	0.5938
5.1	0.0864	0.0874	0.089	0.7494	0.7791	0.7496	0.6133	0.6913	0.6881	0.589	0.5981	0.5971	0.6623	0.6584	0.6066
5.2	0.0874	0.0885	0.089	0.7601	0.7886	0.7611	0.6226	0.7007	0.6991	0.5942	0.6093	0.6083	0.6662	0.6662	0.6156
5.3	0.0853	0.0857	0.0879	0.768	0.8007	0.7692	0.6278	0.7091	0.7054	0.6008	0.6175	0.6165	0.6716	0.6727	0.629
5.4	0.0869	0.087	0.0889	0.7767	0.8071	0.7783	0.6331	0.7128	0.713	0.6089	0.6234	0.6224	0.6761	0.6811	0.6389
5.5	0.0868	0.0879	0.088	0.7861	0.8209	0.7876	0.6412	0.7186	0.7177	0.6163	0.6364	0.6354	0.6822	0.689	0.6496
5.6	0.0861	0.0863	0.0863	0.7914	0.8281	0.7955	0.6462	0.7271	0.7259	0.6305	0.6463	0.6453	0.6874	0.6968	0.6612
5.7	0.0864	0.0865	0.0893	0.8022	0.8357	0.8038	0.6528	0.734	0.7329	0.6312	0.6545	0.6535	0.6962	0.7051	0.6734
5.8	0.087	0.0883	0.0877	0.808	0.8457	0.8112	0.6589	0.7383	0.7392	0.6365	0.6596	0.6586	0.7015	0.7115	0.6835
5.9	0.0876	0.0885	0.0897	0.8172	0.852	0.8192	0.6612	0.745	0.7479	0.6425	0.6679	0.6669	0.7082	0.7208	0.6931
6	0.0857	0.0864	0.0882	0.8214	0.8615	0.8246	0.6741	0.7465	0.7521	0.6483	0.6724	0.6714	0.714	0.7273	0.7053
6.1	0.0863	0.0874	0.0886	0.8286	0.8688	0.8328	0.6764	0.7505	0.7592	0.6551	0.6789	0.6779	0.7221	0.7363	0.7148
6.2	0.0865	0.0876	0.0891	0.8328	0.8748	0.8364	0.6791	0.7596	0.7609	0.6621	0.6855	0.6845	0.728	0.7416	0.7236
6.3	0.0869	0.0874	0.0874	0.8414	0.8826	0.8448	0.6839	0.7622	0.7691	0.6666	0.6923	0.6913	0.7376	0.7507	0.7335
6.4	0.0875	0.0876	0.0879	0.8498	0.8898	0.8502	0.6814	0.7649	0.7858	0.6733	0.7015	0.7005	0.7453	0.7585	0.7422
6.5	0.0876	0.0879	0.0889	0.8543	0.898	0.8563	0.6978	0.7711	0.7965	0.6796	0.7105	0.7095	0.7518	0.7653	0.7519
6.6	0.0864	0.087	0.0886	0.8606	0.9023	0.8634	0.6978	0.7752	0.7884	0.6828	0.7153	0.7143	0.7574	0.7718	0.758
6.7	0.0873	0.0865	0.0877	0.8676	0.91	0.8702	0.7002	0.7831	0.7912	0.6906	0.7196	0.7186	0.7651	0.7795	0.7659
6.8	0.0878	0.0868	0.0887	0.8698	0.9113	0.8725	0.7041	0.7882	0.7897	0.6931	0.7217	0.7207	0.7687	0.7825	0.7727
6.9	0.0852	0.0853	0.0871	0.8768	0.9198	0.8779	0.7132	0.7842	0.8006	0.6987	0.7309	0.7299	0.777	0.7892	0.7803
7	0.0867	0.0862	0.0875	0.8754	0.9187	0.8793	0.7143	0.7857	0.8021	0.703	0.734	0.733	0.7762	0.7919	0.7854
7.1	0.0859	0.0853	0.0885	0.8835	0.9252	0.8852	0.7184	0.7884	0.8092	0.7073	0.7374	0.7364	0.7858	0.7981	0.7914
7.2	0.0867	0.0872	0.0895	0.8881	0.9323	0.8902	0.7219	0.793	0.8182	0.7126	0.7445	0.7435	0.7896	0.8034	0.7995
7.3	0.086	0.0855	0.0867	0.8898	0.9334	0.8927	0.7235	0.7937	0.8178	0.7168	0.7466	0.7456	0.7936	0.8074	0.8041
7.4	0.0884	0.0876	0.0886	0.893	0.9363	0.8949	0.7276	0.7972	0.8183	0.7195	0.7522	0.7512	0.7986	0.8104	0.8109
7.5	0.0867	0.0857	0.0878	0.8953	0.9409	0.8987	0.7321	0.7992	0.8223	0.723	0.757	0.756	0.8017	0.815	0.8167
7.6	0.0859	0.0858	0.0869	0.8988	0.9422	0.9008	0.7334	0.8005	0.8249	0.7242	0.7578	0.7568	0.8055	0.8182	0.8217
7.7	0.087	0.0866	0.088	0.9054	0.9471	0.9043	0.7391	0.8031	0.8273	0.7299	0.7654	0.7644	0.8147	0.8228	0.8262
7.8	0.0872	0.0863	0.0874	0.9067	0.9541	0.9088	0.7426	0.8067	0.8315	0.7336	0.7682	0.7672	0.819	0.829	0.8337
7.9	0.0868	0.0875	0.0897	0.9108	0.961	0.9137	0.7487	0.8114	0.8385	0.7367	0.7744	0.7734	0.8247	0.8348	0.841
8	0.0865	0.086	0.0878	0.9125	0.9606	0.9156	0.7504	0.8126	0.8398	0.7386	0.7757	0.7747	0.8277	0.838	0.8441
8.1	0.0862	0.087	0.0884	0.9178	0.9627	0.9183	0.7535	0.8136	0.84	0.7399	0.7784	0.7774	0.8336	0.8419	0.8474
8.2	0.0877	0.0881	0.0896	0.9173	0.967	0.9212	0.7553	0.8144	0.8428	0.7436	0.7829	0.7819	0.8352	0.8446	0.8518
8.3	0.0857	0.0858	0.088	0.9231	0.9723	0.9254	0.7585	0.8173	0.8515	0.7473	0.7865	0.7855	0.8423	0.8492	0.8566
8.4	0.0864	0.0881	0.0882	0.9232	0.9719	0.9259	0.7606	0.8187	0.8495	0.7482	0.789	0.788	0.8429	0.8506	0.8605
8.5	0.0869	0.0876	0.0879	0.9253	0.9752	0.9289	0.7637	0.8194	0.852	0.7502	0.7913	0.7903	0.846	0.8548	0.8635
8.6	0.0873	0.0874	0.0885	0.9286	0.981	0.9328	0.7685	0.822	0.8561	0.7527	0.7956	0.7946	0.8483	0.8576	0.8688
8.7	0.0861	0.0859	0.0877	0.9304	0.98	0.9339	0.7691	0.8227	0.8576	0.7542	0.7979	0.7969	0.8519	0.8589	0.8701
8.8	0.0867	0.087	0.0889	0.9354	0.9865	0.9385	0.7717	0.8254	0.8594	0.7573	0.8038	0.8028	0.8574	0.8642	0.8748
8.9	0.0871	0.0868	0.0877	0.9362	0.9902	0.9396	0.7737	0.829	0.8626	0.7598	0.8066	0.8056	0.8599	0.8663	0.8802
9	0.088	0.0877	0.0883	0.9396	0.9921	0.9429	0.7766	0.8295	0.8649	0.7621	0.811	0.81	0.8638	0.8695	0.8815
9.1	0.0875	0.087	0.0889	0.9415	0.9936	0.9445	0.7771	0.8294	0.8655	0.7641	0.8129	0.8119	0.8673	0.8717	0.884
9.2	0.0872	0.0865	0.089	0.9428	0.9948	0.9457	0.7788	0.8318	0.8684	0.7657	0.8163	0.8153	0.8679	0.8727	0.8869
9.3	0.0862	0.087	0.0871	0.9444	0.9987	0.9497	0.7807	0.833	0.8701	0.7684	0.8189	0.8179	0.8707	0.877	0.8909
9.4	0.0863	0.0879	0.088	0.9474	1.0051	0.9515	0.7841	0.8351	0.8727	0.7693	0.8237	0.8227	0.8745	0.8788	0.8979
9.5	0.0871	0.088	0.0894	0.9515	1.0056	0.954	0.7865	0.8389	0.875	0.7714	0.8273	0.8263	0.8793	0.8814	0.8983
9.6	0.0871	0.0876	0.0879	0.9516	1.0108	0.9567	0.7879	0.8369	0.8771	0.775	0.8305	0.8295	0.8808	0.8841	0.9025
9.7	0.0873	0.088	0.0877	0.9556	1.0124	0.9586	0.7891	0.8394	0.8792	0.776	0.8339	0.8329	0.886	0.8863	0.9053
9.8	0.0866	0.0863	0.0877	0.9569	1.0154	0.9617	0.789	0.84	0.8815	0.7786	0.8373	0.8363	0.8879	0.8899	0.908
9.9	0.086	0.0876	0.0876	0.9583	1.018	0.964	0.7934	0.8435	0.8851	0.7799	0.8409	0.8399	0.8891	0.8915	0.9119
10	0.0875	0.0868	0.0881	0.9587	1.0182	0.965	0.7929	0.8457	0.886	0.782	0.8432	0.8422	0.8911	0.8921	0.9136
10.1	0.0815	0.0891	0.0877	0.9662	1.0267	0.969	0.7964	0.8571	0.8914	0.785	0.8492	0.8482	0.8985	0.897	0.9193
10.2	0.0811	0.0893	0.088	0.9667	1.0281	0.9715	0.7982	0.8506	0.8925	0.7861	0.8502	0.8492	0.9007	0.8993	0.9225
10.3	0.081	0.0891	0.0882	0.9686	1.032	0.9739	0.799	0.8506	0.8953	0.7879	0.8543	0.8533	0.903	0.9022	0.9255
10.4	0.0814	0.0895	0.0878	0.9668	1.032	0.9739	0.8007	0.8517	0.8951	0.7896	0.8547	0.8537	0.901	0.902	0.9267
10.5	0.0808	0.0892	0.0877	0.9685	1.0317	0.9757	0.8032	0.8527	0.8944	0.7901	0.8553	0.8543	0.9025	0.9024	0.9275
10.6	0.0814	0.0895	0.088	0.9751	1.0396	0.9796	0.807	0.8571	0.9004	0.7935	0.8625	0.8615	0.9096	0.9072	0.933
10.7	0.0813	0.0893	0.088	0.9732	1.0402	0.9813	0.8074	0.8579	0.8984	0.7936	0.8623	0.8613	0.9083	0.9079	0.9352
10.8	0.0815	0.0894	0.0879	0.9781	1.0427	0.9841	0.8092	0.862	0.9044	0.7963	0.8665	0.8655	0.9145	0.9116	0.9372
10.9	0.081	0.0893	0.0879	0.9772	1.0457	0.9848	0.8104	0.8845	0.9031	0.7958	0.8669	0.8659	0.9133	0.9116	0.9406
11	0.081	0.0893	0.0878	0.9784	1.0482	0.9878	0.8121	0.8946	0.9053	0.7981	0.8691	0.8681	0.9139	0.9154	0.943
11.1	0.0813	0.0893	0.0878	0.9831	1.0505	0.99	0.8138	0.8666	0.9078	0.799	0.8719	0.8709	0.9209	0.9169	0.9451
11.2	0.0812	0.0894	0.0879	0.9844	1.0536	0.9913	0.8164	0.8861	0.9114	0.8006	0.8735	0.8725	0.9222	0.9184	0.9485
11.3	0.0811	0.0894	0.0879	0.9837	1.0537	0.9929	0.8178	0.8711	0.9082	0.8021	0.874	0.873	0.9216	0.9192	0.9489
11.4	0.0816	0.0893	0.0879	0.988	1.0591	0.9965	0.8186	0.8723	0.9135	0.8036	0.8776	0.8766	0.9269	0.9227	0.9538
11.5	0.0812	0.0892	0.0878	0.9912	1.065	0.9987	0.8229	0.8704	0.9141	0.8056	0.8825	0.8815	0.9312	0.9245	0.9587
11.6	0.0812	0.0892	0.0878	0.9896	1.0611	0.9993	0.8238	0.8762	0.9108	0.8056	0.8794	0.8784	0.9291	0.9257	0.9573
11.7	0.0813	0.0895	0.088	0.9946	1.0684	1.0045	0.8272	0.8748	0.9228	0.808	0.8847	0.8837	0.9346	0.9302	0.963
11.8	0.081	0.0892	0.0879	0.9933	1.0658	1.0035	0.8313	0.8763	0.9189	0.8083	0.8832	0.8822	0.9338	0.9298	0.9627
11.9	0.081	0.0893	0.0879	0.9949	1.068	1.0059	0.8339	0.8865	0.9134	0.8091	0.8848	0.8838	0.9347	0.9315	0.9655
12	0.0812	0.0892	0.088	0.9969	1.0688	1.0082	0.8229	0.8798	0.9154	0.8103	0.8863	0.8853	0.9367	0.9329	0.9675
12.1	0.0813	0.0891	0.0879	0.9992	1.0711	1.0117	0.8239	0.8844	0.9157	0.8105	0.887	0.886	0.9405	0.9353	0.9698
12.2	0.0817	0.0894	0.0878	1.003	1.0804	1.0156	0.8304	0.8941	0.9201	0.8132	0.892	0.891	0.9451	0.9399	0.9762
12.3	0.0818	0.0892	0.0879	1.0046	1.0794	1.0172	0.8313	0.8899	0.9282	0.8137	0.8934	0.8924	0.9455	0.9413	0.9774
12.4	0.0813	0.0892	0.0878	1.0053	1.079	1.0187	0.8356	0.8935	0.924	0.8138	0.8924	0.8914	0.9464	0.9414	0.9788
12.5	0.0813	0.0891	0.0879	1.009	1.0823	1.0203	0.8382	0.8954	0.9224	0.8148	0.896	0.895	0.9517	0.9452	0.9818
12.6	0.0811	0.0891	0.0878	1.0118	1.0843	1.0228	0.8412	0.8914	0.9221	0.8162	0.8977	0.8967	0.9545	0.9462	0.9846
12.7	0.0807	0.0893	0.0879	1.0105	1.0858	1.025	0.8387	0.8932	0.9258	0.8164	0.8986	0.8976	0.9536	0.9482	0.9871
12.8	0.081	0.0892	0.0881	1.0159	1.0929	1.0286	0.8374	0.8974	0.9329	0.8189	0.9029	0.9019	0.9593	0.9523	0.9917
12.9	0.0812	0.0891	0.0879	1.0136	1.0888	1.0282	0.8409	0.8964	0.9334	0.8189	0.901	0.9	0.9574	0.9518	0.9915
13	0.0812	0.0891	0.0878	1.0179	1.0912	1.0302	0.8429	0.8943	0.928	0.8193	0.9029	0.9019	0.9619	0.9541	0.9939
13.1	0.081	0.0893	0.088	1.0174	1.0921	1.0321	0.8453	0.9009	0.9343	0.8206	0.9052	0.9042	0.9618	0.9557	0.9952
13.2	0.081	0.0892	0.0878	1.0207	1.0951	1.0346	0.8459	0.8997	0.9301	0.8209	0.9069	0.9059	0.9651	0.9576	0.9982
13.3	0.0813	0.0893	0.0881	1.0198	1.0952	1.0341	0.8462	0.9022	0.9273	0.8215	0.9073	0.9063	0.9641	0.958	0.9997
13.4	0.0808	0.0893	0.0877	1.0229	1.098	1.0363	0.8446	0.902	0.9339	0.8229	0.9076	0.9066	0.9691	0.961	1.0016
13.5	0.081	0.0891	0.0879	1.0248	1.0987	1.0396	0.8445	0.9019	0.9369	0.8236	0.9103	0.9093	0.9702	0.963	1.0034
13.6	0.0813	0.089	0.088	1.0257	1.1009	1.0405	0.8488	0.9055	0.9382	0.8241	0.9091	0.9081	0.9722	0.9653	1.0059
13.7	0.0808	0.089	0.0877	1.0307	1.1056	1.0437	0.8551	0.9024	0.9501	0.8254	0.9138	0.9128	0.9788	0.9686	1.0085
13.8	0.0808	0.089	0.088	1.0282	1.1038	1.0437	0.8499	0.904	0.9386	0.8255	0.9125	0.9115	0.9765	0.9683	1.009
13.9	0.0809	0.0893	0.088	1.0293	1.1046	1.0452	0.849	0.9048	0.9426	0.826	0.9147	0.9137	0.9772	0.9697	1.0112
14	0.081	0.0892	0.0878	1.0314	1.1053	1.0474	0.8498	0.9037	0.9416	0.8256	0.9156	0.9146	0.979	0.9718	1.0117

## Sheet: Sheet2
time (h)	blank4	blank5	blank6	WT4	WT5	WT6	rpsB4	rpsB5	rpsB6	rplS4	rplS5	rplS6	rpoS4	rpoS5	rpoS6
0	31	37	46	37	25	27	52	45	53	25	42	33	36	33	28
0.1	35	39	40	38	30	27	52	45	50	35	44	42	35	38	30
0.2	30	43	45	42	36	27	58	44	53	25	42	36	24	29	33
0.3	26	37	44	32	28	25	58	60	53	29	43	41	35	37	26
0.4	41	39	40	42	32	27	53	45	53	26	43	36	28	39	30
0.5	39	37	43	28	27	29	57	45	50	25	45	38	32	35	35
0.6	35	41	33	37	34	28	58	44	53	24	41	37	32	35	30
0.7	32	37	44	31	29	35	58	60	53	32	46	45	30	38	23
0.8	38	41	37	33	34	26	52	45	53	34	46	42	34	31	19
0.9	40	30	37	38	40	28	57	48	50	35	51	45	24	29	33
1	37	35	34	30	29	31	58	44	53	34	48	43	35	37	26
1.1	30	37	40	35	30	27	58	60	53	32	49	47	28	30	18
1.2	39	37	44	31	23	24	57	52	59	34	52	48	32	35	25
1.3	40	40	33	29	25	29	69	66	65	34	53	50	32	35	30
1.4	44	39	38	33	34	33	80	69	83	34	49	46	34	31	19
1.5	36	42	35	35	33	29	71	67	78	37	55	47	24	29	33
1.6	32	35	41	29	30	29	77	81	82	42	57	51	35	37	26
1.7	40	36	32	36	27	32	87	84	78	44	62	53	28	30	18
1.8	35	50	39	35	24	28	80	89	97	48	67	58	32	35	25
1.9	37	40	33	37	32	26	102	110	110	56	77	75	32	35	30
2	31	30	39	28	30	31	129	115	122	78	97	93	32	31	27
2.1	35	39	43	28	28	32	122	129	133	100	120	103	30	30	18
2.2	35	41	37	31	28	22	142	146	153	109	122	123	40	35	19
2.3	32	37	37	27	25	24	169	169	172	130	142	153	34	28	31
2.4	30	45	35	36	31	23	182	195	192	145	187	173	30	32	27
2.5	36	27	41	34	27	35	203	207	214	180	195	196	30	31	26
2.6	40	41	36	27	33	25	240	236	245	190	217	218	30	31	21
2.7	45	38	37	30	29	27	257	255	264	233	242	243	34	30	23
2.8	35	40	35	32	30	32	275	272	285	259	280	273	25	28	18
2.9	41	41	33	33	30	29	314	298	312	303	322	313	30	34	29
3	39	36	33	29	29	33	346	346	345	335	362	353	31	39	22
3.1	33	41	38	34	29	32	379	377	375	380	395	393	22	38	29
3.2	39	41	42	35	24	22	446	441	425	410	407	433	37	32	25
3.3	35	37	45	33	26	24	445	496	442	450	495	490	32	30	30
3.4	37	36	44	34	27	30	503	586	502	520	557	538	37	40	29
3.5	37	39	35	37	28	26	552	589	544	570	607	599	33	41	27
3.6	33	40	28	40	30	29	602	576	612	633	647	633	39	33	29
3.7	38	41	36	37	36	42	660	657	638	700	706	703	43	39	24
3.8	36	40	37	46	38	34	700	669	687	735	784	744	37	38	32
3.9	42	32	39	42	40	40	749	700	713	778	807	796	40	40	37
4	35	38	29	56	48	47	791	753	742	873	862	853	38	32	27
4.1	34	40	40	53	54	50	820	804	813	942	954	899	40	32	22
4.2	33	33	34	61	55	54	914	856	831	997	965	938	33	31	22
4.3	40	40	34	67	49	46	923	915	855	1029	1015	1026	29	35	30
4.4	42	39	33	61	60	53	954	943	898	1073	1069	1062	31	29	23
4.5	38	36	38	61	62	65	1004	968	1081	1156	1108	1092	31	33	25
4.6	36	36	34	66	63	57	1073	969	1120	1162	1205	1120	36	28	25
4.7	41	38	37	65	62	64	1113	1044	1158	1219	1236	1197	32	41	26
4.8	40	37	35	66	61	62	1167	1076	1208	1293	1243	1211	37	34	29
4.9	33	33	31	63	69	65	1229	1177	1249	1348	1350	1255	38	29	18
5	33	29	30	60	62	62	1265	1227	1326	1404	1362	1355	36	38	25
5.1	45	32	34	65	64	65	1324	1276	1387	1420	1418	1381	33	32	18
5.2	33	30	32	58	65	62	1415	1298	1471	1468	1501	1460	38	33	23
5.3	33	35	37	68	72	59	1404	1395	1488	1540	1539	1494	35	36	29
5.4	38	37	44	69	60	68	1476	1455	1561	1590	1627	1553	42	37	32
5.5	32	36	39	54	71	54	1541	1485	1604	1637	1608	1598	42	46	36
5.6	34	42	37	67	56	66	1602	1580	1705	1767	1734	1647	45	47	39
5.7	38	35	45	55	65	59	1657	1607	1793	1777	1738	1723	48	48	41
5.8	35	36	33	53	57	59	1741	1676	1844	1851	1803	1735	52	48	43
5.9	37	33	29	60	64	55	1781	1727	1932	1887	1860	1808	54	55	44
6	31	34	42	56	56	67	1894	1742	1956	1919	1872	1846	56	59	46
6.1	35	26	38	60	61	55	1929	1852	2010	1966	1933	1862	57	59	49
6.2	30	37	35	68	55	50	2027	1897	2085	1998	1948	1971	63	64	52
6.3	29	34	37	52	54	51	2057	1986	2133	2039	2010	1976	64	64	53
6.4	38	28	39	57	55	59	2095	1993	2232	2156	2072	2079	67	66	57
6.5	34	39	27	56	55	48	2185	2110	2269	2111	2118	2085	72	69	65
6.6	31	32	40	53	57	54	2266	2164	2333	2246	2214	2118	75	75	68
6.7	40	35	30	55	57	51	2254	2212	2397	2264	2217	2154	75	76	68
6.8	33	42	34	53	48	44	2384	2277	2408	2305	2249	2231	75	83	77
6.9	32	36	33	48	51	49	2438	2264	2518	2316	2322	2256	83	89	79
7	36	41	30	49	49	45	2507	2368	2570	2371	2358	2325	85	86	82
7.1	29	29	38	49	60	53	2516	2481	2651	2430	2380	2421	91	94	86
7.2	30	30	34	62	48	49	2598	2476	2691	2438	2395	2446	101	108	103
7.3	30	33	40	51	51	45	2663	2585	2686	2552	2473	2436	110	107	117
7.4	36	36	34	48	43	46	2705	2622	2811	2548	2517	2448	126	127	124
7.5	33	36	35	54	48	47	2795	2683	2851	2619	2601	2510	117	133	125
7.6	31	37	46	48	47	48	2830	2704	2933	2660	2573	2548	121	128	122
7.7	35	39	40	56	48	50	2875	2700	2884	2655	2660	2563	129	122	124
7.8	30	43	45	51	53	48	2981	2734	2953	2663	2584	2633	127	134	138
7.9	26	37	44	53	49	44	3007	2847	3049	2683	2673	2677	118	134	134
8	41	39	40	53	49	48	3062	2909	3070	2727	2678	2666	131	143	149
8.1	39	37	43	53	49	46	3047	2930	3155	2769	2723	2740	139	154	146
8.2	35	41	33	49	39	53	3101	3008	3158	2808	2776	2722	146	156	159
8.3	32	37	44	55	50	48	3177	3067	3215	2913	2777	2725	159	163	165
8.4	38	41	37	61	47	46	3186	3138	3291	2835	2828	2789	157	174	166
8.5	40	30	37	43	55	53	3181	3157	3284	2926	2817	2784	163	176	160
8.6	37	35	34	49	50	48	3264	3130	3251	2952	2872	2874	167	176	174
8.7	30	37	40	54	52	51	3335	3145	3385	2885	2911	2829	195	191	183
8.8	39	37	44	60	52	49	3301	3197	3421	2973	2892	2901	194	182	184
8.9	40	40	33	46	56	54	3399	3301	3479	2991	2939	2885	180	191	188
9	44	39	38	51	46	46	3386	3351	3445	2988	2920	2951	198	199	189
9.1	36	42	35	52	47	55	3396	3361	3520	2975	2944	2987	200	194	204
9.2	32	35	41	51	48	46	3429	3341	3554	3017	2988	2960	231	200	217
9.3	40	36	32	46	49	49	3458	3415	3528	3057	3010	2968	216	231	221
9.4	35	50	39	59	49	53	3508	3446	3624	3037	3014	3053	225	227	235
9.5	37	40	33	46	48	51	3501	3373	3578	3103	3019	3084	238	234	224
9.6	31	30	39	46	47	56	3569	3447	3606	3152	3067	3076	243	249	242
9.7	35	39	43	48	50	54	3556	3577	3626	3100	3063	3063	256	255	259
9.8	35	41	37	53	53	41	3622	3482	3691	3159	3045	3039	269	272	272
9.9	32	37	37	56	50	49	3599	3546	3637	3096	3133	3097	278	261	282
10	30	45	35	55	50	47	3702	3567	3748	3169	3080	3094	280	277	275
10.1	36	27	41	56	49	55	3701	3597	3727	3180	3113	3108	295	294	283
10.2	40	41	36	46	47	49	3770	3627	3772	3197	3153	3135	285	295	305
10.3	45	38	37	40	48	47	3748	3630	3746	3217	3155	3119	307	301	320
10.4	35	40	35	49	53	53	3781	3668	3714	3239	3214	3215	310	293	315
10.5	41	41	33	53	47	51	3741	3685	3740	3256	3153	3216	314	331	327
10.6	39	36	33	39	43	65	3831	3621	3759	3271	3214	3174	333	320	329
10.7	33	41	38	46	46	58	3822	3737	3856	3256	3216	3155	335	336	344
10.8	39	41	42	54	50	50	3869	3787	3839	3250	3207	3165	371	344	346
10.9	35	37	45	46	51	50	3810	3754	3878	3304	3266	3223	377	358	363
11	37	36	44	54	46	54	3846	3780	3905	3232	3230	3244	381	371	370
11.1	37	39	35	44	43	47	3872	3729	3902	3243	3262	3196	388	390	375
11.2	33	40	28	53	48	50	3920	3806	3910	3399	3274	3249	422	394	399
11.3	38	41	36	49	49	50	3914	3843	3990	3306	3297	3260	413	403	381
11.4	36	40	37	47	48	47	4015	3907	3932	3336	3327	3314	410	407	403
11.5	42	32	39	45	47	49	3940	3892	3979	3365	3312	3263	417	429	444
11.6	35	38	29	48	48	48	4023	3866	4000	3383	3280	3302	422	431	441
11.7	34	40	40	42	49	50	3967	3853	4075	3399	3361	3237	450	438	431
11.8	33	33	34	39	49	43	3969	3884	4023	3468	3364	3345	461	447	466
11.9	40	40	34	44	47	48	4018	4003	4055	3381	3366	3292	478	479	474
12	42	39	33	35	44	48	4101	3887	4139	3402	3413	3332	468	486	478
12.1	38	36	38	51	46	38	4021	3988	4109	3438	3381	3372	507	486	522
12.2	36	36	34	42	40	44	4067	3987	4094	3436	3399	3339	492	526	521
12.3	41	38	37	40	49	38	4049	4052	4100	3448	3417	3396	528	524	538
12.4	40	37	35	40	44	46	4143	4051	4161	3481	3398	3412	549	566	558
12.5	33	33	31	41	38	50	4080	4022	4159	3467	3412	3370	583	574	579
12.6	33	29	30	41	37	51	4151	4101	4208	3493	3420	3411	562	596	624
12.7	45	32	34	43	42	43	4191	4090	4217	3468	3533	3425	620	621	638
12.8	33	30	32	34	44	41	4179	4098	4179	3483	3429	3411	613	630	634
12.9	33	35	37	34	41	46	4177	4175	4280	3556	3422	3403	630	657	640
13	38	37	44	39	46	43	4171	4162	4210	3442	3448	3410	683	678	667
13.1	32	36	39	40	41	49	4107	4124	4275	3425	3416	3461	674	698	694
13.2	34	42	37	40	42	44	4139	4159	4241	3395	3378	3397	714	699	700
13.3	38	35	45	42	47	47	4226	4193	4314	3356	3372	3414	733	730	738
13.4	35	36	33	36	41	51	4216	4176	4300	3356	3360	3363	763	741	790
13.5	37	33	29	43	40	48	4153	4188	4261	3366	3402	3346	799	771	786
13.6	31	34	42	36	39	42	4118	4287	4301	3417	3347	3397	843	787	808
13.7	35	26	38	43	42	43	4128	4139	4271	3366	3384	3382	898	889	894
13.8	30	37	35	34	44	41	4237	4182	4254	3419	3415	3488	915	965	924
13.9	29	34	37	34	41	46	4147	4182	4235	3429	3426	3438	915	904	945
14	38	28	39	39	46	43	4122	4189	4268	3417	3448	3375	976	941	957
