# Supplementary material for: RECKLEEN: a lambda Red/CRISPR-Cas9 based single plasmid platform for fast, efficient, markerless, and scarless genome editing in Klebsiella pneumoniae
Source: Research Square preprint supplement (doi:10.21203/rs.3.rs-5859838/v1), 2025-02-28
Supplement: Supplementary file 28 [file rplS.xlsx]

## Sheet: OD600
time (h)	blank1	blank2	blank3	blank4	blank5	blank6	rplS1	rplS2	rplS3	rplS4	rplS5	rplS6	rplS-B	rplS-B	rplS-B	rplS-B	rplS-B	rplS-B
0	0.0806	0.0884	0.0884	0.0872	0.0885	0.0899	0.094	0.0976	0.0984	0.0972	0.0959	0.0949	0.0134	0.0092	0.01	0.01	0.0074	0.005
0.0999444	0.0804	0.0879	0.0878	0.0865	0.0865	0.0889	0.0972	0.0967	0.0972	0.0971	0.0955	0.0945	0.0168	0.0088	0.0094	0.0106	0.009	0.0056
0.199944	0.0807	0.0882	0.0879	0.0864	0.0861	0.0898	0.0969	0.0966	0.0979	0.0962	0.0959	0.0949	0.0162	0.0084	0.01	0.0098	0.0098	0.0051
0.299944	0.0809	0.088	0.088	0.0874	0.0869	0.0882	0.0968	0.0974	0.0979	0.0962	0.0959	0.0949	0.0159	0.0094	0.0099	0.0088	0.009	0.0067
0.399972	0.0809	0.0878	0.0878	0.088	0.0884	0.0904	0.0975	0.0975	0.0987	0.0966	0.0962	0.0952	0.0166	0.0097	0.0109	0.0086	0.0078	0.0048
0.499972	0.0807	0.0877	0.0879	0.0878	0.0879	0.0897	0.098	0.0986	0.0994	0.0975	0.0965	0.0955	0.0173	0.0109	0.0115	0.0097	0.0086	0.0058
0.6	0.0809	0.0879	0.0879	0.0866	0.0874	0.0879	0.0994	0.099	0.0998	0.0973	0.0971	0.0961	0.0185	0.0111	0.0119	0.0107	0.0097	0.0082
0.7	0.0816	0.088	0.088	0.0868	0.0875	0.0898	0.1003	0.1004	0.1034	0.0982	0.0979	0.0969	0.0187	0.0124	0.0154	0.0114	0.0104	0.0071
0.8	0.0816	0.0876	0.0881	0.0881	0.0874	0.0894	0.1007	0.1011	0.1024	0.0986	0.0984	0.0974	0.0191	0.0135	0.0143	0.0105	0.011	0.008
0.900028	0.0814	0.0881	0.0879	0.0871	0.0866	0.0887	0.1029	0.1031	0.104	0.0994	0.0992	0.0982	0.0215	0.015	0.0161	0.0123	0.0126	0.0095
1.00003	0.0808	0.0878	0.0877	0.0866	0.0871	0.088	0.104	0.105	0.1064	0.1004	0.1003	0.0993	0.0232	0.0172	0.0187	0.0138	0.0132	0.0113
1.10006	0.081	0.0879	0.0878	0.0887	0.0882	0.0885	0.1065	0.1075	0.1089	0.1016	0.1015	0.1005	0.0255	0.0196	0.0211	0.0129	0.0133	0.012
1.20006	0.081	0.088	0.0879	0.0867	0.0863	0.0881	0.1096	0.1109	0.1118	0.1022	0.1031	0.1021	0.0286	0.0229	0.0239	0.0155	0.0168	0.014
1.30006	0.0808	0.088	0.088	0.0878	0.0875	0.0885	0.1125	0.1154	0.1158	0.1043	0.1044	0.1034	0.0317	0.0274	0.0278	0.0165	0.0169	0.0149
1.40008	0.081	0.0881	0.0879	0.0876	0.0872	0.0881	0.1177	0.1197	0.1205	0.1063	0.1067	0.1057	0.0367	0.0316	0.0326	0.0187	0.0195	0.0176
1.50008	0.0807	0.0883	0.0879	0.0869	0.088	0.0892	0.1226	0.1252	0.127	0.108	0.1096	0.1086	0.0419	0.0369	0.0391	0.0211	0.0216	0.0194
1.60011	0.0816	0.0885	0.0883	0.0868	0.0861	0.0884	0.1288	0.1333	0.1331	0.1114	0.1129	0.1119	0.0472	0.0448	0.0448	0.0246	0.0268	0.0235
1.70011	0.0806	0.0884	0.0879	0.0868	0.0866	0.0885	0.1366	0.1423	0.1437	0.1144	0.1175	0.1165	0.056	0.0539	0.0558	0.0276	0.0309	0.028
1.80014	0.0811	0.0896	0.0881	0.0873	0.0859	0.0883	0.1458	0.1538	0.1524	0.1194	0.1218	0.1208	0.0647	0.0642	0.0643	0.0321	0.0359	0.0325
1.90014	0.0809	0.0898	0.0878	0.0879	0.0873	0.0883	0.1563	0.1665	0.1642	0.1234	0.1272	0.1262	0.0754	0.0767	0.0764	0.0355	0.0399	0.0379
2.00014	0.0812	0.0908	0.0876	0.0879	0.0884	0.0891	0.1683	0.1829	0.1789	0.1296	0.1332	0.1322	0.0871	0.0921	0.0913	0.0417	0.0448	0.0431
2.10017	0.0813	0.0908	0.0879	0.086	0.0856	0.0871	0.1846	0.2022	0.1945	0.1354	0.1409	0.1399	0.1033	0.1114	0.1066	0.0494	0.0553	0.0528
2.20017	0.0806	0.0907	0.0878	0.0878	0.0882	0.0888	0.2029	0.2225	0.2105	0.143	0.1499	0.1489	0.1223	0.1318	0.1227	0.0552	0.0617	0.0601
2.30019	0.0814	0.0914	0.0879	0.0865	0.0864	0.0875	0.2218	0.243	0.2307	0.1526	0.1581	0.1571	0.1404	0.1516	0.1428	0.0661	0.0717	0.0696
2.40019	0.0809	0.0914	0.0877	0.0869	0.087	0.0887	0.2449	0.267	0.2507	0.1626	0.1699	0.1689	0.164	0.1756	0.163	0.0757	0.0829	0.0802
2.50019	0.0813	0.0914	0.0878	0.0866	0.0859	0.0881	0.266	0.2942	0.2703	0.1753	0.183	0.182	0.1847	0.2028	0.1825	0.0887	0.0971	0.0939
2.60022	0.0807	0.0911	0.0878	0.0847	0.0852	0.0868	0.2974	0.3139	0.2914	0.1899	0.1976	0.1966	0.2167	0.2228	0.2036	0.1052	0.1124	0.1098
2.70022	0.0812	0.0907	0.0878	0.087	0.0875	0.089	0.318	0.3451	0.314	0.2063	0.2139	0.2129	0.2368	0.2544	0.2262	0.1193	0.1264	0.1239
2.80025	0.0808	0.0901	0.0877	0.0865	0.0877	0.0882	0.3394	0.3698	0.3371	0.2257	0.2307	0.2297	0.2586	0.2797	0.2494	0.1392	0.143	0.1415
2.90025	0.0817	0.0903	0.0878	0.0849	0.0853	0.0878	0.3649	0.3953	0.364	0.2462	0.2502	0.2492	0.2832	0.305	0.2762	0.1613	0.1649	0.1614
3.00025	0.0809	0.0896	0.0878	0.0853	0.0866	0.0871	0.3856	0.4164	0.3862	0.2648	0.2665	0.2655	0.3047	0.3268	0.2984	0.1795	0.1799	0.1784
3.10028	0.0803	0.0895	0.0878	0.0873	0.0864	0.0874	0.4033	0.4399	0.408	0.2857	0.2842	0.2832	0.323	0.3504	0.3202	0.1984	0.1978	0.1958
3.20028	0.0808	0.0893	0.0878	0.0863	0.0861	0.0867	0.4211	0.4614	0.4283	0.3067	0.3039	0.3029	0.3403	0.3721	0.3405	0.2204	0.2178	0.2162
3.30031	0.0809	0.0892	0.0881	0.0871	0.0882	0.0884	0.4368	0.4867	0.4507	0.3307	0.3211	0.3201	0.3559	0.3975	0.3626	0.2436	0.2329	0.2317
3.40031	0.0817	0.0889	0.0879	0.0872	0.087	0.088	0.453	0.5097	0.4749	0.3552	0.3409	0.3399	0.3713	0.4208	0.387	0.268	0.2539	0.2519
3.50031	0.0813	0.0886	0.0878	0.0876	0.0878	0.0876	0.4657	0.5279	0.4945	0.3782	0.3598	0.3588	0.3844	0.4393	0.4067	0.2906	0.272	0.2712
3.60033	0.0816	0.0886	0.0877	0.0879	0.0869	0.0886	0.4778	0.5466	0.5144	0.4056	0.3797	0.3787	0.3962	0.458	0.4267	0.3177	0.2928	0.2901
3.70033	0.0818	0.0886	0.0876	0.0853	0.0861	0.0878	0.4886	0.5647	0.5311	0.4291	0.4004	0.3994	0.4068	0.4761	0.4435	0.3438	0.3143	0.3116
3.80033	0.0816	0.0886	0.0877	0.0876	0.0869	0.0876	0.4998	0.5779	0.547	0.4479	0.4221	0.4211	0.4182	0.4893	0.4593	0.3603	0.3352	0.3335
3.90036	0.0815	0.0885	0.0876	0.0876	0.0871	0.0881	0.5095	0.5928	0.5606	0.465	0.442	0.441	0.428	0.5043	0.473	0.3774	0.3549	0.3529
4.00036	0.0811	0.0885	0.0879	0.0868	0.0869	0.0885	0.5161	0.6005	0.5793	0.4791	0.4657	0.4647	0.435	0.512	0.4914	0.3923	0.3788	0.3762
4.10039	0.0812	0.0887	0.088	0.0873	0.0882	0.0889	0.5284	0.6174	0.5893	0.4882	0.484	0.483	0.4472	0.5287	0.5013	0.4009	0.3958	0.3941
4.20039	0.0817	0.0885	0.0877	0.0856	0.0877	0.0871	0.5411	0.6257	0.6021	0.501	0.5042	0.5032	0.4594	0.5372	0.5144	0.4154	0.4165	0.4161
4.30042	0.0818	0.0887	0.0878	0.0865	0.0864	0.0886	0.5513	0.6332	0.6119	0.508	0.5182	0.5172	0.4695	0.5445	0.5241	0.4215	0.4318	0.4286
4.40042	0.0811	0.0886	0.0877	0.0849	0.0855	0.0865	0.5587	0.6441	0.6241	0.5222	0.5346	0.5336	0.4776	0.5555	0.5364	0.4373	0.4491	0.4471
4.50042	0.0813	0.0888	0.0879	0.0861	0.0862	0.0874	0.5661	0.6519	0.6307	0.5312	0.5411	0.5401	0.4848	0.5631	0.5428	0.4451	0.4549	0.4527
4.60044	0.0811	0.0887	0.0877	0.0868	0.088	0.0883	0.5839	0.6564	0.6435	0.544	0.5539	0.5529	0.5028	0.5677	0.5558	0.4572	0.4659	0.4646
4.70044	0.0817	0.0888	0.0879	0.0867	0.0876	0.0883	0.5847	0.6694	0.6502	0.556	0.5655	0.5645	0.503	0.5806	0.5623	0.4693	0.4779	0.4762
4.80047	0.0819	0.0889	0.088	0.0868	0.087	0.0885	0.5928	0.6757	0.6675	0.5631	0.5727	0.5717	0.5109	0.5868	0.5795	0.4763	0.4857	0.4832
4.90047	0.0816	0.0889	0.0878	0.0862	0.0865	0.0877	0.6008	0.6832	0.6771	0.5746	0.583	0.582	0.5192	0.5943	0.5893	0.4884	0.4965	0.4943
5.00047	0.0818	0.0887	0.0878	0.0873	0.0869	0.0882	0.612	0.6867	0.6838	0.5823	0.5923	0.5913	0.5302	0.598	0.596	0.495	0.5054	0.5031
5.1005	0.0817	0.0889	0.0879	0.0864	0.0874	0.089	0.6128	0.6916	0.6883	0.589	0.5981	0.5971	0.5311	0.6027	0.6004	0.5026	0.5107	0.5081
5.2005	0.082	0.089	0.0879	0.0874	0.0885	0.089	0.6221	0.701	0.6993	0.5942	0.6093	0.6083	0.5401	0.612	0.6114	0.5068	0.5208	0.5193
5.30053	0.0816	0.0886	0.0878	0.0853	0.0857	0.0879	0.6273	0.7094	0.7056	0.6008	0.6175	0.6165	0.5457	0.6208	0.6178	0.5155	0.5318	0.5286
5.40053	0.0819	0.0887	0.0879	0.0869	0.087	0.0889	0.6326	0.7131	0.7132	0.6089	0.6234	0.6224	0.5507	0.6244	0.6253	0.522	0.5364	0.5335
5.50053	0.0814	0.0886	0.0879	0.0868	0.0879	0.088	0.6407	0.7189	0.7179	0.6163	0.6364	0.6354	0.5593	0.6303	0.63	0.5295	0.5485	0.5474
5.60056	0.0815	0.0887	0.0879	0.0861	0.0863	0.0863	0.6457	0.7274	0.7261	0.6305	0.6463	0.6453	0.5642	0.6387	0.6382	0.5444	0.56	0.559
5.70056	0.0817	0.0887	0.088	0.0864	0.0865	0.0893	0.6523	0.7343	0.7331	0.6312	0.6545	0.6535	0.5706	0.6456	0.6451	0.5448	0.568	0.5642
5.80058	0.0817	0.0886	0.0879	0.087	0.0883	0.0877	0.6584	0.7386	0.7394	0.6365	0.6596	0.6586	0.5767	0.65	0.6515	0.5495	0.5713	0.5709
5.90058	0.0814	0.0884	0.0876	0.0876	0.0885	0.0897	0.6607	0.7453	0.7481	0.6425	0.6679	0.6669	0.5793	0.6569	0.6605	0.5549	0.5794	0.5772
6.00061	0.0814	0.0886	0.0878	0.0857	0.0864	0.0882	0.6736	0.7468	0.7523	0.6483	0.6724	0.6714	0.5922	0.6582	0.6645	0.5626	0.586	0.5832
6.10061	0.0815	0.0884	0.0877	0.0863	0.0874	0.0886	0.6759	0.7508	0.7594	0.6551	0.6789	0.6779	0.5944	0.6624	0.6717	0.5688	0.5915	0.5893
6.20061	0.0819	0.0887	0.0879	0.0865	0.0876	0.0891	0.6786	0.7599	0.7611	0.6621	0.6855	0.6845	0.5967	0.6712	0.6732	0.5756	0.5979	0.5954
6.30064	0.0814	0.0886	0.0877	0.0869	0.0874	0.0874	0.6834	0.7625	0.7693	0.6666	0.6923	0.6913	0.602	0.6739	0.6816	0.5797	0.6049	0.6039
6.40064	0.0809	0.0887	0.0878	0.0875	0.0876	0.0879	0.6809	0.7652	0.786	0.6733	0.7015	0.7005	0.6	0.6765	0.6982	0.5858	0.6139	0.6126
6.50064	0.0815	0.0886	0.0878	0.0876	0.0879	0.0889	0.6973	0.7714	0.7967	0.6796	0.7105	0.7095	0.6158	0.6828	0.7089	0.592	0.6226	0.6206
6.60067	0.0814	0.0889	0.0879	0.0864	0.087	0.0886	0.6973	0.7755	0.7886	0.6828	0.7153	0.7143	0.6159	0.6866	0.7007	0.5964	0.6283	0.6257
6.70067	0.081	0.0891	0.0879	0.0873	0.0865	0.0877	0.6997	0.7834	0.7914	0.6906	0.7196	0.7186	0.6187	0.6943	0.7035	0.6033	0.6331	0.6309
6.80069	0.0816	0.0889	0.0876	0.0878	0.0868	0.0887	0.7036	0.7885	0.7899	0.6931	0.7217	0.7207	0.622	0.6996	0.7023	0.6053	0.6349	0.632
6.90069	0.0813	0.089	0.0878	0.0852	0.0853	0.0871	0.7127	0.7845	0.8008	0.6987	0.7309	0.7299	0.6314	0.6955	0.713	0.6135	0.6456	0.6428
7.00069	0.081	0.0891	0.0877	0.0867	0.0862	0.0875	0.7138	0.786	0.8023	0.703	0.734	0.733	0.6328	0.6969	0.7146	0.6163	0.6478	0.6455
7.10072	0.081	0.0889	0.0879	0.0859	0.0853	0.0885	0.7179	0.7887	0.8094	0.7073	0.7374	0.7364	0.6369	0.6998	0.7215	0.6214	0.6521	0.6479
7.20072	0.0818	0.0888	0.0879	0.0867	0.0872	0.0895	0.7214	0.7933	0.8184	0.7126	0.7445	0.7435	0.6396	0.7045	0.7305	0.6259	0.6573	0.654
7.30075	0.0816	0.0888	0.0877	0.086	0.0855	0.0867	0.723	0.794	0.818	0.7168	0.7466	0.7456	0.6414	0.7052	0.7303	0.6308	0.6611	0.6589
7.40075	0.0811	0.0889	0.0878	0.0884	0.0876	0.0886	0.7271	0.7975	0.8185	0.7195	0.7522	0.7512	0.646	0.7086	0.7307	0.6311	0.6646	0.6626
7.50078	0.0817	0.0889	0.0878	0.0867	0.0857	0.0878	0.7316	0.7995	0.8225	0.723	0.757	0.756	0.6499	0.7106	0.7347	0.6363	0.6713	0.6682
7.60078	0.0815	0.0891	0.0878	0.0859	0.0858	0.0869	0.7329	0.8008	0.8251	0.7242	0.7578	0.7568	0.6514	0.7117	0.7373	0.6383	0.672	0.6699
7.70078	0.0818	0.089	0.0878	0.087	0.0866	0.088	0.7386	0.8034	0.8275	0.7299	0.7654	0.7644	0.6568	0.7144	0.7397	0.6429	0.6788	0.6764
7.80081	0.0813	0.0889	0.0876	0.0872	0.0863	0.0874	0.7421	0.807	0.8317	0.7336	0.7682	0.7672	0.6608	0.7181	0.7441	0.6464	0.6819	0.6798
7.90081	0.0816	0.089	0.088	0.0868	0.0875	0.0897	0.7482	0.8117	0.8387	0.7367	0.7744	0.7734	0.6666	0.7227	0.7507	0.6499	0.6869	0.6837
8.00083	0.0814	0.0891	0.0878	0.0865	0.086	0.0878	0.7499	0.8129	0.84	0.7386	0.7757	0.7747	0.6685	0.7238	0.7522	0.6521	0.6897	0.6869
8.10083	0.0811	0.0888	0.0877	0.0862	0.087	0.0884	0.753	0.8139	0.8402	0.7399	0.7784	0.7774	0.6719	0.7251	0.7525	0.6537	0.6914	0.689
8.20083	0.0811	0.089	0.088	0.0877	0.0881	0.0896	0.7548	0.8147	0.843	0.7436	0.7829	0.7819	0.6737	0.7257	0.755	0.6559	0.6948	0.6923
8.30086	0.0815	0.0888	0.0877	0.0857	0.0858	0.088	0.758	0.8176	0.8517	0.7473	0.7865	0.7855	0.6765	0.7288	0.764	0.6616	0.7007	0.6975
8.40086	0.0809	0.0887	0.0877	0.0864	0.0881	0.0882	0.7601	0.819	0.8497	0.7482	0.789	0.788	0.6792	0.7303	0.762	0.6618	0.7009	0.6998
8.50089	0.0813	0.0888	0.0877	0.0869	0.0876	0.0879	0.7632	0.8197	0.8522	0.7502	0.7913	0.7903	0.6819	0.7309	0.7645	0.6633	0.7037	0.7024
8.60089	0.0818	0.0891	0.088	0.0873	0.0874	0.0885	0.768	0.8223	0.8563	0.7527	0.7956	0.7946	0.6862	0.7332	0.7683	0.6654	0.7082	0.7061
8.70089	0.0812	0.0887	0.0877	0.0861	0.0859	0.0877	0.7686	0.823	0.8578	0.7542	0.7979	0.7969	0.6874	0.7343	0.7701	0.6681	0.712	0.7092
8.80092	0.081	0.0888	0.0878	0.0867	0.087	0.0889	0.7712	0.8257	0.8596	0.7573	0.8038	0.8028	0.6902	0.7369	0.7718	0.6706	0.7168	0.7139
8.90092	0.0811	0.0888	0.0877	0.0871	0.0868	0.0877	0.7732	0.8293	0.8628	0.7598	0.8066	0.8056	0.6921	0.7405	0.7751	0.6727	0.7198	0.7179
9.00094	0.0815	0.0888	0.0877	0.088	0.0877	0.0883	0.7761	0.8298	0.8651	0.7621	0.811	0.81	0.6946	0.741	0.7774	0.6741	0.7233	0.7217
9.10094	0.0811	0.0888	0.0878	0.0875	0.087	0.0889	0.7766	0.8297	0.8657	0.7641	0.8129	0.8119	0.6955	0.7409	0.7779	0.6766	0.7259	0.723
9.20094	0.0817	0.0888	0.0878	0.0872	0.0865	0.089	0.7783	0.8321	0.8686	0.7657	0.8163	0.8153	0.6966	0.7433	0.7808	0.6785	0.7298	0.7263
9.30097	0.0812	0.0888	0.0877	0.0862	0.087	0.0871	0.7802	0.8333	0.8703	0.7684	0.8189	0.8179	0.699	0.7445	0.7826	0.6822	0.7319	0.7308
9.40097	0.0815	0.0888	0.0879	0.0863	0.0879	0.088	0.7836	0.8354	0.8729	0.7693	0.8237	0.8227	0.7021	0.7466	0.785	0.683	0.7358	0.7347
9.501	0.0809	0.089	0.0878	0.0871	0.088	0.0894	0.786	0.8392	0.8752	0.7714	0.8273	0.8263	0.7051	0.7502	0.7874	0.6843	0.7393	0.7369
9.601	0.0811	0.089	0.0879	0.0871	0.0876	0.0879	0.7874	0.8372	0.8773	0.775	0.8305	0.8295	0.7063	0.7482	0.7894	0.6879	0.7429	0.7416
9.701	0.0811	0.0888	0.0876	0.0873	0.088	0.0877	0.7886	0.8397	0.8794	0.776	0.8339	0.8329	0.7075	0.7509	0.7918	0.6887	0.7459	0.7452
9.80103	0.0811	0.0888	0.0878	0.0866	0.0863	0.0877	0.7885	0.8403	0.8817	0.7786	0.8373	0.8363	0.7074	0.7515	0.7939	0.692	0.751	0.7486
9.90103	0.0817	0.0888	0.0878	0.086	0.0876	0.0876	0.7929	0.8438	0.8853	0.7799	0.8409	0.8399	0.7112	0.755	0.7975	0.6939	0.7533	0.7523
10.0011	0.0812	0.089	0.0878	0.0875	0.0868	0.0881	0.7924	0.846	0.8862	0.782	0.8432	0.8422	0.7112	0.757	0.7984	0.6945	0.7564	0.7541
10.1011	0.0815	0.0891	0.0877	0.0815	0.0891	0.0877	0.7959	0.8574	0.8916	0.785	0.8492	0.8482	0.7144	0.7683	0.8039	0.7035	0.7601	0.7605
10.2011	0.0811	0.0893	0.088	0.0811	0.0893	0.088	0.7977	0.8509	0.8927	0.7861	0.8502	0.8492	0.7166	0.7616	0.8047	0.705	0.7609	0.7612
10.3011	0.081	0.0891	0.0882	0.081	0.0891	0.0882	0.7985	0.8509	0.8955	0.7879	0.8543	0.8533	0.7175	0.7618	0.8073	0.7069	0.7652	0.7651
10.4011	0.0814	0.0895	0.0878	0.0814	0.0895	0.0878	0.8002	0.852	0.8953	0.7896	0.8547	0.8537	0.7188	0.7625	0.8075	0.7082	0.7652	0.7659
10.5011	0.0808	0.0892	0.0877	0.0808	0.0892	0.0877	0.8027	0.853	0.8946	0.7901	0.8553	0.8543	0.7219	0.7638	0.8069	0.7093	0.7661	0.7666
10.6011	0.0814	0.0895	0.088	0.0814	0.0895	0.088	0.8065	0.8574	0.9006	0.7935	0.8625	0.8615	0.7251	0.7679	0.8126	0.7121	0.773	0.7735
10.7011	0.0813	0.0893	0.088	0.0813	0.0893	0.088	0.8069	0.8582	0.8986	0.7936	0.8623	0.8613	0.7256	0.7689	0.8106	0.7123	0.773	0.7733
10.8011	0.0815	0.0894	0.0879	0.0815	0.0894	0.0879	0.8087	0.8623	0.9046	0.7963	0.8665	0.8655	0.7272	0.7729	0.8167	0.7148	0.7771	0.7776
10.9011	0.081	0.0893	0.0879	0.081	0.0893	0.0879	0.8099	0.8848	0.9033	0.7958	0.8669	0.8659	0.7289	0.7955	0.8154	0.7148	0.7776	0.778
11.0011	0.081	0.0893	0.0878	0.081	0.0893	0.0878	0.8116	0.8949	0.9055	0.7981	0.8691	0.8681	0.7306	0.8056	0.8177	0.7171	0.7798	0.7803
11.1012	0.0813	0.0893	0.0878	0.0813	0.0893	0.0878	0.8133	0.8669	0.908	0.799	0.8719	0.8709	0.732	0.7776	0.8202	0.7177	0.7826	0.7831
11.2012	0.0812	0.0894	0.0879	0.0812	0.0894	0.0879	0.8159	0.8864	0.9116	0.8006	0.8735	0.8725	0.7347	0.797	0.8237	0.7194	0.7841	0.7846
11.3012	0.0811	0.0894	0.0879	0.0811	0.0894	0.0879	0.8173	0.8714	0.9084	0.8021	0.874	0.873	0.7362	0.782	0.8205	0.721	0.7846	0.7851
11.4012	0.0816	0.0893	0.0879	0.0816	0.0893	0.0879	0.8181	0.8726	0.9137	0.8036	0.8776	0.8766	0.7365	0.7833	0.8258	0.722	0.7883	0.7887
11.5012	0.0812	0.0892	0.0878	0.0812	0.0892	0.0878	0.8224	0.8707	0.9143	0.8056	0.8825	0.8815	0.7412	0.7815	0.8265	0.7244	0.7933	0.7937
11.6012	0.0812	0.0892	0.0878	0.0812	0.0892	0.0878	0.8233	0.8765	0.911	0.8056	0.8794	0.8784	0.7421	0.7873	0.8232	0.7244	0.7902	0.7906
11.7012	0.0813	0.0895	0.088	0.0813	0.0895	0.088	0.8267	0.8751	0.923	0.808	0.8847	0.8837	0.7454	0.7856	0.835	0.7267	0.7952	0.7957
11.8013	0.081	0.0892	0.0879	0.081	0.0892	0.0879	0.8308	0.8766	0.9191	0.8083	0.8832	0.8822	0.7498	0.7874	0.8312	0.7273	0.794	0.7943
11.9013	0.081	0.0893	0.0879	0.081	0.0893	0.0879	0.8334	0.8868	0.9136	0.8091	0.8848	0.8838	0.7524	0.7975	0.8257	0.7281	0.7955	0.7959
12.0013	0.0812	0.0892	0.088	0.0812	0.0892	0.088	0.8224	0.8801	0.9156	0.8103	0.8863	0.8853	0.7412	0.7909	0.8276	0.7291	0.7971	0.7973
12.1013	0.0813	0.0891	0.0879	0.0813	0.0891	0.0879	0.8234	0.8847	0.9159	0.8105	0.887	0.886	0.7421	0.7956	0.828	0.7292	0.7979	0.7981
12.2013	0.0817	0.0894	0.0878	0.0817	0.0894	0.0878	0.8299	0.8944	0.9203	0.8132	0.892	0.891	0.7482	0.805	0.8325	0.7315	0.8026	0.8032
12.3013	0.0818	0.0892	0.0879	0.0818	0.0892	0.0879	0.8308	0.8902	0.9284	0.8137	0.8934	0.8924	0.749	0.801	0.8405	0.7319	0.8042	0.8045
12.4013	0.0813	0.0892	0.0878	0.0813	0.0892	0.0878	0.8351	0.8938	0.9242	0.8138	0.8924	0.8914	0.7538	0.8046	0.8364	0.7325	0.8032	0.8036
12.5013	0.0813	0.0891	0.0879	0.0813	0.0891	0.0879	0.8377	0.8957	0.9226	0.8148	0.896	0.895	0.7564	0.8066	0.8347	0.7335	0.8069	0.8071
12.6013	0.0811	0.0891	0.0878	0.0811	0.0891	0.0878	0.8407	0.8917	0.9223	0.8162	0.8977	0.8967	0.7596	0.8026	0.8345	0.7351	0.8086	0.8089
12.7014	0.0807	0.0893	0.0879	0.0807	0.0893	0.0879	0.8382	0.8935	0.926	0.8164	0.8986	0.8976	0.7575	0.8042	0.8381	0.7357	0.8093	0.8097
12.8014	0.081	0.0892	0.0881	0.081	0.0892	0.0881	0.8369	0.8977	0.9331	0.8189	0.9029	0.9019	0.7559	0.8085	0.845	0.7379	0.8137	0.8138
12.9014	0.0812	0.0891	0.0879	0.0812	0.0891	0.0879	0.8404	0.8967	0.9336	0.8189	0.901	0.9	0.7592	0.8076	0.8457	0.7377	0.8119	0.8121
13.0014	0.0812	0.0891	0.0878	0.0812	0.0891	0.0878	0.8424	0.8946	0.9282	0.8193	0.9029	0.9019	0.7612	0.8055	0.8404	0.7381	0.8138	0.8141
13.1014	0.081	0.0893	0.088	0.081	0.0893	0.088	0.8448	0.9012	0.9345	0.8206	0.9052	0.9042	0.7638	0.8119	0.8465	0.7396	0.8159	0.8162
13.2014	0.081	0.0892	0.0878	0.081	0.0892	0.0878	0.8454	0.9	0.9303	0.8209	0.9069	0.9059	0.7644	0.8108	0.8425	0.7399	0.8177	0.8181
13.3014	0.0813	0.0893	0.0881	0.0813	0.0893	0.0881	0.8457	0.9025	0.9275	0.8215	0.9073	0.9063	0.7644	0.8132	0.8394	0.7402	0.818	0.8182
13.4014	0.0808	0.0893	0.0877	0.0808	0.0893	0.0877	0.8441	0.9023	0.9341	0.8229	0.9076	0.9066	0.7633	0.813	0.8464	0.7421	0.8183	0.8189
13.5014	0.081	0.0891	0.0879	0.081	0.0891	0.0879	0.844	0.9022	0.9371	0.8236	0.9103	0.9093	0.763	0.8131	0.8492	0.7426	0.8212	0.8214
13.6014	0.0813	0.089	0.088	0.0813	0.089	0.088	0.8483	0.9058	0.9384	0.8241	0.9091	0.9081	0.767	0.8168	0.8504	0.7428	0.8201	0.8201
13.7014	0.0808	0.089	0.0877	0.0808	0.089	0.0877	0.8546	0.9027	0.9503	0.8254	0.9138	0.9128	0.7738	0.8137	0.8626	0.7446	0.8248	0.8251
13.8015	0.0808	0.089	0.088	0.0808	0.089	0.088	0.8494	0.9043	0.9388	0.8255	0.9125	0.9115	0.7686	0.8153	0.8508	0.7447	0.8235	0.8235
13.9015	0.0809	0.0893	0.088	0.0809	0.0893	0.088	0.8485	0.9051	0.9428	0.826	0.9147	0.9137	0.7676	0.8158	0.8548	0.7451	0.8254	0.8257
14.0015	0.081	0.0892	0.0878	0.081	0.0892	0.0878	0.8493	0.904	0.9418	0.8256	0.9156	0.9146	0.7683	0.8148	0.854	0.7446	0.8264	0.8268

## Sheet: _flu_mscarlet
time (h)	blank1	blank2	blank3	blank4	blank5	blank6	rplS1	rplS2	rplS3	rplS4	rplS5	rplS6	rplS-B	rplS-B	rplS-B	rplS-B	rplS-B	rplS-B
0	35	27	43	31	37	46	35	35	30	25	42	33	0	8	-13	-6	5	-13
0.0999444	38	31	41	35	39	40	45	37	39	35	44	42	7	6	-2	0	5	2
0.199944	32	26	36	30	43	45	35	35	33	25	42	36	3	9	-3	-5	-1	-9
0.299944	42	23	36	26	37	44	39	36	38	29	43	41	-3	13	2	3	6	-3
0.399972	33	31	42	41	39	40	36	36	33	26	43	36	3	5	-9	-15	4	-4
0.499972	39	31	43	39	37	43	35	38	35	25	45	38	-4	7	-8	-14	8	-5
0.6	34	35	39	35	41	33	34	34	34	24	41	37	0	-1	-5	-11	0	4
0.7	38	19	33	32	37	44	42	39	42	32	46	45	4	20	9	0	9	1
0.8	29	31	29	38	41	37	44	39	39	34	46	42	15	8	10	-4	5	5
0.900028	34	26	32	40	30	37	45	44	42	35	51	45	11	18	10	-5	21	8
1.00003	39	30	30	37	35	34	44	41	40	34	48	43	5	11	10	-3	13	9
1.10006	33	28	34	30	37	40	42	42	44	32	49	47	9	14	10	2	12	7
1.20006	35	28	34	39	37	44	44	45	45	34	52	48	9	17	11	-5	15	4
1.30006	38	27	40	40	40	33	44	46	47	34	53	50	6	19	7	-6	13	17
1.40008	31	23	38	44	39	38	44	42	43	34	49	46	13	19	5	-10	10	8
1.50008	29	37	34	36	42	35	47	48	44	37	55	47	18	11	10	1	13	12
1.60011	37	30	36	32	35	41	52	50	48	42	57	51	15	20	12	10	22	10
1.70011	30	22	33	40	36	32	54	55	50	44	62	53	24	33	17	4	26	21
1.80014	35	29	31	35	50	39	58	60	55	48	67	58	23	31	24	13	17	19
1.90014	35	34	41	37	40	33	66	70	72	56	77	75	31	36	31	19	37	42
2.00014	31	31	42	31	30	39	88	90	90	78	97	93	57	59	48	47	67	54
2.10017	30	22	33	35	39	43	110	113	100	100	120	103	80	91	67	65	81	60
2.20017	35	23	39	35	41	37	119	115	120	109	122	123	84	92	81	74	81	86
2.30019	28	35	36	32	37	37	140	135	150	130	142	153	112	100	114	98	105	116
2.40019	32	31	34	30	45	35	155	180	170	145	187	173	123	149	136	115	142	138
2.50019	31	30	31	36	27	41	190	188	193	180	195	196	159	158	162	144	168	155
2.60022	31	25	36	40	41	36	200	210	215	190	217	218	169	185	179	150	176	182
2.70022	30	27	32	45	38	37	243	235	240	233	242	243	213	208	208	188	204	206
2.80025	28	22	33	35	40	35	269	273	270	259	280	273	241	251	237	224	240	238
2.90025	32	36	27	41	41	33	313	315	310	303	322	313	281	279	283	262	281	280
3.00025	35	23	34	39	36	33	345	355	350	335	362	353	310	332	316	296	326	320
3.10028	35	25	29	33	41	38	390	388	390	380	395	393	355	363	361	347	354	355
3.20028	34	26	29	39	41	42	420	400	430	410	407	433	386	374	401	371	366	391
3.30031	26	20	33	35	37	45	460	488	487	450	495	490	434	468	454	415	458	445
3.40031	36	24	40	37	36	44	530	550	535	520	557	538	494	526	495	483	521	494
3.50031	34	33	35	37	39	35	580	600	596	570	607	599	546	567	561	533	568	564
3.60033	34	20	33	33	40	28	643	640	630	633	647	633	609	620	597	600	607	605
3.70033	36	29	31	38	41	36	710	699	700	700	706	703	674	670	669	662	665	667
3.80033	38	28	33	36	40	37	745	777	741	735	784	744	707	749	708	699	744	707
3.90036	41	28	29	42	32	39	788	800	793	778	807	796	747	772	764	736	775	757
4.00036	36	26	31	35	38	29	883	855	850	873	862	853	847	829	819	838	824	824
4.10039	36	30	29	34	40	40	952	947	896	942	954	899	916	917	867	908	914	859
4.20039	30	27	35	33	33	34	1007	958	935	997	965	938	977	931	900	964	932	904
4.30042	33	30	34	40	40	34	1039	1008	1023	1029	1015	1026	1006	978	989	989	975	992
4.40042	34	27	34	42	39	33	1083	1062	1059	1073	1069	1062	1049	1035	1025	1031	1030	1029
4.50042	32	26	37	38	36	38	1166	1101	1089	1156	1108	1092	1134	1075	1052	1118	1072	1054
4.60044	29	26	33	36	36	34	1172	1198	1117	1162	1205	1120	1143	1172	1084	1126	1169	1086
4.70044	32	31	32	41	38	37	1229	1229	1194	1219	1236	1197	1197	1198	1162	1178	1198	1160
4.80047	33	26	31	40	37	35	1303	1236	1208	1293	1243	1211	1270	1210	1177	1253	1206	1176
4.90047	35	34	34	33	33	31	1358	1343	1252	1348	1350	1255	1323	1309	1218	1315	1317	1224
5.00047	32	29	34	33	29	30	1414	1355	1352	1404	1362	1355	1382	1326	1318	1371	1333	1325
5.1005	31	30	33	45	32	34	1430	1411	1378	1420	1418	1381	1399	1381	1345	1375	1386	1347
5.2005	35	27	38	33	30	32	1478	1494	1457	1468	1501	1460	1443	1467	1419	1435	1471	1428
5.30053	31	23	37	33	35	37	1550	1532	1491	1540	1539	1494	1519	1509	1454	1507	1504	1457
5.40053	36	32	31	38	37	44	1600	1620	1550	1590	1627	1553	1564	1588	1519	1552	1590	1509
5.50053	32	32	32	32	36	39	1647	1601	1595	1637	1608	1598	1615	1569	1563	1605	1572	1559
5.60056	38	28	34	34	42	37	1777	1727	1644	1767	1734	1647	1739	1699	1610	1733	1692	1610
5.70056	29	27	32	38	35	45	1787	1731	1720	1777	1738	1723	1758	1704	1688	1739	1703	1678
5.80058	33	21	31	35	36	33	1861	1796	1732	1851	1803	1735	1828	1775	1701	1816	1767	1702
5.90058	37	32	36	37	33	29	1897	1853	1805	1887	1860	1808	1860	1821	1769	1850	1827	1779
6.00061	27	29	31	31	34	42	1929	1865	1843	1919	1872	1846	1902	1836	1812	1888	1838	1804
6.10061	31	26	40	35	26	38	1976	1926	1859	1966	1933	1862	1945	1900	1819	1931	1907	1824
6.20061	30	33	33	30	37	35	2008	1941	1968	1998	1948	1971	1978	1908	1935	1968	1911	1936
6.30064	29	27	40	29	34	37	2049	2003	1973	2039	2010	1976	2020	1976	1933	2010	1976	1939
6.40064	35	19	33	38	28	39	2166	2065	2076	2156	2072	2079	2131	2046	2043	2118	2044	2040
6.50064	37	29	30	34	39	27	2121	2111	2082	2111	2118	2085	2084	2082	2052	2077	2079	2058
6.60067	37	26	31	31	32	40	2256	2207	2115	2246	2214	2118	2219	2181	2084	2215	2182	2078
6.70067	31	26	35	40	35	30	2274	2210	2151	2264	2217	2154	2243	2184	2116	2224	2182	2124
6.80069	35	34	29	33	42	34	2315	2242	2228	2305	2249	2231	2280	2208	2199	2272	2207	2197
6.90069	31	29	34	32	36	33	2326	2315	2253	2316	2322	2256	2295	2286	2219	2284	2286	2223
7.00069	30	25	33	36	41	30	2381	2351	2322	2371	2358	2325	2351	2326	2289	2335	2317	2295
7.10072	28	33	34	29	29	38	2440	2373	2418	2430	2380	2421	2412	2340	2384	2401	2351	2383
7.20072	38	26	28	30	30	34	2448	2388	2443	2438	2395	2446	2410	2362	2415	2408	2365	2412
7.30075	28	21	24	30	33	40	2562	2466	2433	2552	2473	2436	2534	2445	2409	2522	2440	2396
7.40075	31	21	31	36	36	34	2558	2510	2445	2548	2517	2448	2527	2489	2414	2512	2481	2414
7.50078	25	27	36	33	36	35	2629	2594	2507	2619	2601	2510	2604	2567	2471	2586	2565	2475
7.60078	32	22	26	31	37	46	2670	2566	2545	2660	2573	2548	2638	2544	2519	2629	2536	2502
7.70078	33	26	41	35	39	40	2665	2653	2560	2655	2660	2563	2632	2627	2519	2620	2621	2523
7.80081	34	19	31	30	43	45	2673	2577	2630	2663	2584	2633	2639	2558	2599	2633	2541	2588
7.90081	32	18	28	26	37	44	2693	2666	2674	2683	2673	2677	2661	2648	2646	2657	2636	2633
8.00083	34	27	31	41	39	40	2737	2671	2663	2727	2678	2666	2703	2644	2632	2686	2639	2626
8.10083	30	23	32	39	37	43	2779	2716	2737	2769	2723	2740	2749	2693	2705	2730	2686	2697
8.20083	27	28	34	35	41	33	2818	2769	2719	2808	2776	2722	2791	2741	2685	2773	2735	2689
8.30086	21	22	24	32	37	44	2923	2770	2722	2913	2777	2725	2902	2748	2698	2881	2740	2681
8.40086	27	19	33	38	41	37	2845	2821	2786	2835	2828	2789	2818	2802	2753	2797	2787	2752
8.50089	29	24	30	40	30	37	2936	2810	2781	2926	2817	2784	2907	2786	2751	2886	2787	2747
8.60089	25	26	33	37	35	34	2962	2865	2871	2952	2872	2874	2937	2839	2838	2915	2837	2840
8.70089	28	23	33	30	37	40	2895	2904	2826	2885	2911	2829	2867	2881	2793	2855	2874	2789
8.80092	35	28	35	39	37	44	2983	2885	2898	2973	2892	2901	2948	2857	2863	2934	2855	2857
8.90092	31	28	31	40	40	33	3001	2932	2882	2991	2939	2885	2970	2904	2851	2951	2899	2852
9.00094	28	25	33	44	39	38	2998	2913	2948	2988	2920	2951	2970	2888	2915	2944	2881	2913
9.10094	31	23	34	36	42	35	2985	2937	2984	2975	2944	2987	2954	2914	2950	2939	2902	2952
9.20094	36	22	31	32	35	41	3027	2981	2957	3017	2988	2960	2991	2959	2926	2985	2953	2919
9.30097	25	24	33	40	36	32	3067	3003	2965	3057	3010	2968	3042	2979	2932	3017	2974	2936
9.40097	31	25	30	35	50	39	3047	3007	3050	3037	3014	3053	3016	2982	3020	3002	2964	3014
9.501	20	24	28	37	40	33	3113	3012	3081	3103	3019	3084	3093	2988	3053	3066	2979	3051
9.601	29	23	33	31	30	39	3162	3060	3073	3152	3067	3076	3133	3037	3040	3121	3037	3037
9.701	24	27	29	35	39	43	3110	3056	3060	3100	3063	3063	3086	3029	3031	3065	3024	3020
9.80103	31	26	27	35	41	37	3169	3038	3036	3159	3045	3039	3138	3012	3009	3124	3004	3002
9.90103	26	27	35	32	37	37	3106	3126	3094	3096	3133	3097	3080	3099	3059	3064	3096	3060
10.0011	24	28	28	30	45	35	3179	3073	3091	3169	3080	3094	3155	3045	3063	3139	3035	3059
10.1011	23	26	29	36	27	41	3190	3106	3105	3180	3113	3108	3167	3080	3076	3144	3086	3067
10.2011	27	23	31	40	41	36	3207	3146	3132	3197	3153	3135	3180	3123	3101	3157	3112	3099
10.3011	31	23	37	45	38	37	3227	3148	3116	3217	3155	3119	3196	3125	3079	3172	3117	3082
10.4011	23	24	27	35	40	35	3249	3207	3212	3239	3214	3215	3226	3183	3185	3204	3174	3180
10.5011	28	27	26	41	41	33	3266	3146	3213	3256	3153	3216	3238	3119	3187	3215	3112	3183
10.6011	28	24	27	39	36	33	3281	3207	3171	3271	3214	3174	3253	3183	3144	3232	3178	3141
10.7011	28	22	33	33	41	38	3266	3209	3152	3256	3216	3155	3238	3187	3119	3223	3175	3117
10.8011	32	25	25	39	41	42	3260	3200	3162	3250	3207	3165	3228	3175	3137	3211	3166	3123
10.9011	28	18	28	35	37	45	3314	3259	3220	3304	3266	3223	3286	3241	3192	3269	3229	3178
11.0011	24	17	26	37	36	44	3242	3223	3241	3232	3230	3244	3218	3206	3215	3195	3194	3200
11.1012	27	22	25	37	39	35	3253	3255	3193	3243	3262	3196	3226	3233	3168	3206	3223	3161
11.2012	24	26	29	33	40	28	3409	3267	3246	3399	3274	3249	3385	3241	3217	3366	3234	3221
11.3012	27	24	24	38	41	36	3316	3290	3257	3306	3297	3260	3289	3266	3233	3268	3256	3224
11.4012	25	23	30	36	40	37	3346	3320	3311	3336	3327	3314	3321	3297	3281	3300	3287	3277
11.5012	28	23	27	42	32	39	3375	3305	3260	3365	3312	3263	3347	3282	3233	3323	3280	3224
11.6012	24	16	34	35	38	29	3393	3273	3299	3383	3280	3302	3369	3257	3265	3348	3242	3273
11.7012	21	25	28	34	40	40	3409	3354	3234	3399	3361	3237	3388	3329	3206	3365	3321	3197
11.8013	21	22	29	33	33	34	3478	3357	3342	3468	3364	3345	3457	3335	3313	3435	3331	3311
11.9013	27	29	31	40	40	34	3391	3359	3289	3381	3366	3292	3364	3330	3258	3341	3326	3258
12.0013	21	24	26	42	39	33	3412	3406	3329	3402	3413	3332	3391	3382	3303	3360	3374	3299
12.1013	19	20	29	38	36	38	3448	3374	3369	3438	3381	3372	3429	3354	3340	3400	3345	3334
12.2013	24	26	24	36	36	34	3446	3392	3336	3436	3399	3339	3422	3366	3312	3400	3363	3305
12.3013	24	17	33	41	38	37	3458	3410	3393	3448	3417	3396	3434	3393	3360	3407	3379	3359
12.4013	29	18	25	40	37	35	3491	3391	3409	3481	3398	3412	3462	3373	3384	3441	3361	3377
12.5013	19	27	28	33	33	31	3477	3405	3367	3467	3412	3370	3458	3378	3339	3434	3379	3339
12.6013	29	22	29	33	29	30	3503	3413	3408	3493	3420	3411	3474	3391	3379	3460	3391	3381
12.7014	19	17	24	45	32	34	3478	3526	3422	3468	3533	3425	3459	3509	3398	3423	3501	3391
12.8014	28	17	27	33	30	32	3493	3422	3408	3483	3429	3411	3465	3405	3381	3450	3399	3379
12.9014	22	16	30	33	35	37	3566	3415	3400	3556	3422	3403	3544	3399	3370	3523	3387	3366
13.0014	26	25	27	38	37	44	3452	3441	3407	3442	3448	3410	3426	3416	3380	3404	3411	3366
13.1014	21	22	26	32	36	39	3435	3409	3458	3425	3416	3461	3414	3387	3432	3393	3380	3422
13.2014	21	25	24	34	42	37	3405	3371	3394	3395	3378	3397	3384	3346	3370	3361	3336	3360
13.3014	20	19	25	38	35	45	3366	3365	3411	3356	3372	3414	3346	3346	3386	3318	3337	3369
13.4014	20	19	23	35	36	33	3366	3353	3360	3356	3360	3363	3346	3334	3337	3321	3324	3330
13.5014	22	17	27	37	33	29	3376	3395	3343	3366	3402	3346	3354	3378	3316	3329	3369	3317
13.6014	22	20	20	31	34	42	3427	3340	3394	3417	3347	3397	3405	3320	3374	3386	3313	3355
13.7014	18	17	24	35	26	38	3376	3377	3379	3366	3384	3382	3358	3360	3355	3331	3358	3344
13.8015	29	22	27	30	37	35	3429	3408	3485	3419	3415	3488	3400	3386	3458	3389	3378	3453
13.9015	25	21	22	29	34	37	3439	3419	3435	3429	3426	3438	3414	3398	3413	3400	3392	3401
14.0015	19	23	21	38	28	39	3427	3441	3372	3417	3448	3375	3408	3418	3351	3379	3420	3336

## Sheet: mScarlet7OD
time (h)	rplS1	rplS2	rplS3	rplS4	rplS5	rplS6
0	0	869.565	-1300	-600	675.676	-2600
0.1	416.667	681.818	-212.766	0	555.556	357.143
0.2	185.185	1071.43	-300	-510.204	-102.041	-1764.71
0.3	-188.679	1382.98	202.02	340.909	666.667	-447.761
0.4	180.723	515.464	-825.688	-1744.19	512.821	-833.333
0.5	-231.214	642.202	-695.652	-1443.3	930.233	-862.069
0.6	0	-90.0901	-420.168	-1028.04	0	487.805
0.7	213.904	1612.9	584.416	0	865.385	140.845
0.8	785.34	592.593	699.301	-380.952	454.545	625
0.9	511.628	1200	621.118	-406.504	1666.67	842.105
1	215.517	639.535	534.759	-217.391	984.848	796.46
1.1	352.941	714.286	473.934	155.039	902.256	583.333
1.2	314.685	742.358	460.251	-322.581	892.857	285.714
1.3	189.274	693.431	251.799	-363.636	769.231	1140.94
1.4	354.223	601.266	153.374	-534.759	512.821	454.545
1.5	429.594	298.103	255.754	47.3934	601.852	618.557
1.6	317.797	446.429	267.857	406.504	820.896	425.532
1.7	428.571	612.245	304.659	144.928	841.424	750
1.8	355.487	482.866	373.25	404.984	473.538	584.615
1.9	411.141	469.361	405.759	535.211	927.318	1108.18
2	654.42	640.608	525.739	1127.1	1495.54	1252.9
2.1	774.443	816.876	628.518	1315.79	1464.74	1136.36
2.2	686.836	698.027	660.147	1340.58	1312.8	1430.95
2.3	797.721	659.631	798.319	1482.6	1464.44	1666.67
2.4	750	848.519	834.356	1519.15	1712.91	1720.7
2.5	860.855	779.093	887.671	1623.45	1730.18	1650.69
2.6	779.88	830.341	879.175	1425.86	1565.84	1657.56
2.7	899.493	817.61	919.54	1575.86	1613.92	1662.63
2.8	931.941	897.39	950.281	1609.2	1678.32	1681.98
2.9	992.232	914.754	1024.62	1624.3	1704.06	1734.82
3	1017.39	1015.91	1058.98	1649.03	1812.12	1793.72
3.1	1099.07	1035.96	1127.42	1748.99	1789.69	1813.07
3.2	1134.29	1005.11	1177.68	1683.3	1680.44	1808.51
3.3	1219.44	1177.36	1252.07	1703.61	1966.51	1920.59
3.4	1330.46	1250	1279.07	1802.24	2051.99	1961.1
3.5	1420.4	1290.69	1379.4	1834.14	2088.24	2079.65
3.6	1537.1	1353.71	1399.11	1888.57	2073.09	2085.49
3.7	1656.83	1407.27	1508.46	1925.54	2115.81	2140.56
3.8	1690.58	1530.76	1541.48	1940.05	2219.57	2119.94
3.9	1745.33	1530.83	1615.22	1950.19	2183.71	2145.08
4	1947.13	1619.14	1666.67	2136.12	2175.29	2190.32
4.1	2048.3	1734.44	1729.5	2264.9	2309.25	2179.65
4.2	2126.69	1733.06	1749.61	2320.65	2237.7	2172.55
4.3	2142.71	1796.14	1887.04	2346.38	2257.99	2314.51
4.4	2196.4	1863.19	1910.89	2357.65	2293.48	2301.5
4.5	2339.11	1909.07	1938.1	2511.8	2356.56	2328.25
4.6	2273.27	2064.47	1950.34	2462.82	2509.12	2337.49
4.7	2379.72	2063.38	2066.51	2510.12	2506.8	2435.95
4.8	2485.81	2062.03	2031.06	2630.69	2483.01	2433.77
4.9	2548.15	2202.59	2066.86	2692.47	2652.57	2476.23
5	2606.56	2217.39	2211.41	2769.7	2637.51	2633.67
5.1	2634.16	2291.36	2240.17	2735.77	2713.92	2651.05
5.2	2671.73	2397.06	2320.9	2831.49	2824.5	2749.86
5.3	2783.58	2430.73	2353.51	2923.38	2828.13	2756.34
5.4	2840.02	2543.24	2429.23	2973.18	2964.21	2828.49
5.5	2887.54	2489.29	2480.95	3031.16	2866	2848.01
5.6	3082.24	2660.09	2522.72	3183.32	3021.43	2880.14
5.7	3080.97	2639.41	2616.65	3192	2998.24	2974.12
5.8	3169.76	2730.77	2610.9	3304.82	3092.95	2981.26
5.9	3210.77	2772.11	2678.27	3333.93	3153.26	3082.12
6	3211.75	2789.43	2726.86	3355.85	3136.52	3093.28
6.1	3272.21	2868.36	2708.05	3394.87	3224.01	3095.2
6.2	3314.9	2842.67	2874.33	3419.04	3196.19	3251.6
6.3	3355.48	2932.19	2835.97	3467.31	3266.66	3210.8
6.4	3551.67	3024.39	2926.1	3615.57	3329.53	3330.07
6.5	3384.22	3049.21	2894.63	3508.45	3339.22	3316.15
6.6	3602.86	3176.52	2974.17	3713.95	3472.86	3321.08
6.7	3625.34	3145.61	3007.82	3686.39	3446.53	3366.62
6.8	3665.59	3156.09	3131.14	3753.51	3476.14	3476.27
6.9	3634.78	3286.84	3112.2	3722.9	3540.89	3458.31
7	3715.23	3337.64	3203.19	3788.74	3576.72	3555.38
7.1	3787.09	3343.81	3304.23	3863.86	3605.28	3678.04
7.2	3767.98	3352.73	3305.95	3847.26	3598.05	3688.07
7.3	3950.73	3467.1	3298.64	3998.1	3690.82	3636.36
7.4	3911.76	3512.56	3303.68	3980.35	3733.07	3643.22
7.5	4006.77	3612.44	3363.28	4064.12	3820.94	3703.98
7.6	4049.74	3574.54	3416.52	4118.75	3773.81	3734.89
7.7	4007.31	3677.21	3405.43	4075.28	3861.23	3730.04
7.8	3993.64	3562.18	3492.81	4073.33	3726.35	3807
7.9	3991.9	3664.04	3524.71	4088.32	3837.53	3851.1
8	4043.38	3652.94	3499.07	4119	3826.3	3822.97
8.1	4091.38	3713.97	3594.68	4176.23	3884.87	3914.37
8.2	4142.79	3777.04	3556.29	4227.78	3936.38	3884.15
8.3	4289.73	3770.58	3531.41	4354.59	3910.38	3843.73
8.4	4149	3836.78	3612.86	4226.35	3976.32	3932.55
8.5	4263.09	3811.74	3598.43	4350.97	3960.49	3910.88
8.6	4280.09	3872.07	3693.87	4380.82	4005.93	4022.09
8.7	4170.79	3923.46	3626.8	4273.31	4036.52	3932.6
8.8	4271.23	3877.05	3709.51	4375.19	3982.98	4001.96
8.9	4291.29	3921.67	3678.24	4386.8	4027.51	3972.7
9	4275.84	3897.44	3749.68	4367.3	3983.13	4036.3
9.1	4247.3	3933.05	3792.26	4343.78	3997.8	4082.99
9.2	4293.71	3980.9	3747.44	4399.41	4046.31	4019
9.3	4351.93	4001.34	3746.49	4422.46	4063.4	4017.52
9.4	4295.68	3994.11	3847.13	4395.31	4028.27	4102.35
9.5	4386.61	3982.94	3877.32	4480.49	4029.49	4140.32
9.6	4435.79	4059.08	3851.03	4537	4088.03	4095.2
9.7	4361.84	4033.83	3827.99	4450.41	4054.16	4052.6
9.8	4435.96	4007.98	3790.15	4514.45	4000	4010.15
9.9	4330.71	4104.64	3835.74	4415.62	4109.92	4067.53
10	4436.16	4022.46	3836.42	4519.8	4012.43	4056.49
10.1	4433.09	4008.85	3826.35	4469.08	4059.99	4032.87
10.2	4437.62	4100.58	3853.61	4478.01	4089.89	4071.2
10.3	4454.36	4102.13	3813.95	4487.2	4073.44	4028.23
10.4	4488.04	4174.43	3944.27	4524.15	4147.94	4151.98
10.5	4485.39	4083.53	3949.68	4532.64	4062.13	4152.1
10.6	4486.28	4145.07	3869.06	4538.69	4111.25	4060.76
10.7	4462.51	4144.88	3847.77	4524.78	4107.37	4030.78
10.8	4438.94	4107.91	3841.07	4492.17	4074.12	4016.2
10.9	4508.16	4074.17	3914.64	4573.31	4152.52	4084.83
11	4404.6	3979.64	3931.76	4455.45	4095.92	4100.99
11.1	4407.1	4157.66	3862.47	4467.05	4118.32	4036.52
11.2	4607.32	4066.5	3905.55	4678.9	4124.47	4105.28
11.3	4467.54	4176.47	3940.28	4532.59	4149.89	4106.48
11.4	4509.16	4209.12	3973.12	4570.64	4169.73	4154.94
11.5	4515.65	4199.62	3911.68	4587.24	4134.63	4061.99
11.6	4539.82	4136.92	3966.23	4621.76	4102.76	4139.89
11.7	4545.21	4237.53	3839.52	4630.52	4176.31	4017.85
11.8	4610.56	4235.46	3985.8	4722.95	4195.21	4168.45
11.9	4471.03	4175.55	3945.74	4588.66	4181.02	4093.48
12	4575.01	4276.14	3991.06	4608.42	4232.84	4137.71
12.1	4620.67	4215.69	4033.82	4662.64	4192.25	4177.42
12.2	4573.64	4181.37	3978.38	4647.98	4190.13	4114.79
12.3	4584.78	4235.96	3997.62	4655.01	4201.69	4175.26
12.4	4592.73	4192.15	4045.91	4697.61	4184.51	4202.34
12.5	4571.66	4187.95	4000.24	4681.66	4187.63	4137.03
12.6	4573.46	4225.02	4049.13	4706.84	4193.67	4179.75
12.7	4566.34	4363.34	4054.41	4652.71	4325.96	4187.97
12.8	4583.94	4211.5	4001.18	4675.43	4177.22	4152.13
12.9	4668.07	4208.77	3984.86	4775.65	4171.7	4144.81
13	4500.79	4240.84	4021.89	4611.84	4191.45	4134.63
13.1	4469.76	4171.7	4054.34	4587.61	4142.66	4192.6
13.2	4427	4126.79	4000	4542.51	4079.74	4107.08
13.3	4377.29	4114.61	4033.83	4482.57	4079.46	4117.58
13.4	4383.6	4100.86	3942.58	4475.14	4062.08	4066.43
13.5	4395.81	4154.47	3904.85	4482.9	4102.53	4038.23
13.6	4439.37	4064.64	3967.54	4558.43	4039.75	4090.96
13.7	4339.62	4129.29	3889.4	4473.54	4071.29	4052.84
13.8	4423.63	4153.07	4064.41	4550.83	4102	4193.08
13.9	4447.63	4165.24	3992.75	4563.15	4109.52	4118.93
14	4435.77	4194.89	3923.89	4538.01	4138.43	4034.83
	#DIV/0!	#DIV/0!	#DIV/0!	#DIV/0!	#DIV/0!	#DIV/0!
