# Supplementary material for: RECKLEEN: a lambda Red/CRISPR-Cas9 based single plasmid platform for fast, efficient, markerless, and scarless genome editing in Klebsiella pneumoniae
Source: Research Square preprint supplement (doi:10.21203/rs.3.rs-5859838/v1), 2025-02-28
Supplement: Supplementary file 31 [file rpoS.xlsx]

## Sheet: OD600
time (h)	blank1	blank2	blank3	blank4	blank5	blank6	rpoS1	rpoS2	rpoS3	rpoS4	rpoS5	rpoS6	rpoS-B	rpoS-B	rpoS-B	rpoS-B	rpoS-B	rpoS-B
0	0.0806	0.0884	0.0884	0.0872	0.0885	0.0899	0.1014	0.1005	0.1033	0.0984	0.0995	0.1063	0.0208	0.0121	0.0149	0.0112	0.011	0.0164
0.0999444	0.0804	0.0879	0.0878	0.0865	0.0865	0.0889	0.1006	0.1005	0.1025	0.0976	0.0995	0.1055	0.0202	0.0126	0.0147	0.0111	0.013	0.0166
0.199944	0.0807	0.0882	0.0879	0.0864	0.0861	0.0898	0.101	0.1008	0.1023	0.098	0.0998	0.1053	0.0203	0.0126	0.0144	0.0116	0.0137	0.0155
0.299944	0.0809	0.088	0.088	0.0874	0.0869	0.0882	0.1012	0.1004	0.1022	0.0982	0.0994	0.1052	0.0203	0.0124	0.0142	0.0108	0.0125	0.017
0.399972	0.0809	0.0878	0.0878	0.088	0.0884	0.0904	0.1002	0.1014	0.1023	0.0972	0.1004	0.1053	0.0193	0.0136	0.0145	0.0092	0.012	0.0149
0.499972	0.0807	0.0877	0.0879	0.0878	0.0879	0.0897	0.1006	0.1021	0.1022	0.0976	0.1011	0.1052	0.0199	0.0144	0.0143	0.0098	0.0132	0.0155
0.6	0.0809	0.0879	0.0879	0.0866	0.0874	0.0879	0.1018	0.1029	0.1026	0.0988	0.1019	0.1056	0.0209	0.015	0.0147	0.0122	0.0145	0.0177
0.7	0.0816	0.088	0.088	0.0868	0.0875	0.0898	0.1029	0.1033	0.1044	0.0999	0.1023	0.1074	0.0213	0.0153	0.0164	0.0131	0.0148	0.0176
0.8	0.0816	0.0876	0.0881	0.0881	0.0874	0.0894	0.1034	0.1039	0.1049	0.1004	0.1029	0.1079	0.0218	0.0163	0.0168	0.0123	0.0155	0.0185
0.900028	0.0814	0.0881	0.0879	0.0871	0.0866	0.0887	0.1039	0.1045	0.1054	0.1009	0.1035	0.1084	0.0225	0.0164	0.0175	0.0138	0.0169	0.0197
1.00003	0.0808	0.0878	0.0877	0.0866	0.0871	0.088	0.105	0.1051	0.106	0.102	0.1041	0.109	0.0242	0.0173	0.0183	0.0154	0.017	0.021
1.10006	0.081	0.0879	0.0878	0.0887	0.0882	0.0885	0.106	0.1062	0.1069	0.103	0.1052	0.1099	0.025	0.0183	0.0191	0.0143	0.017	0.0214
1.20006	0.081	0.088	0.0879	0.0867	0.0863	0.0881	0.1075	0.1078	0.1084	0.1045	0.1068	0.1114	0.0265	0.0198	0.0205	0.0178	0.0205	0.0233
1.30006	0.0808	0.088	0.088	0.0878	0.0875	0.0885	0.1089	0.1088	0.1106	0.1059	0.1078	0.1136	0.0281	0.0208	0.0226	0.0181	0.0203	0.0251
1.40008	0.081	0.0881	0.0879	0.0876	0.0872	0.0881	0.1104	0.1106	0.1118	0.1074	0.1096	0.1148	0.0294	0.0225	0.0239	0.0198	0.0224	0.0267
1.50008	0.0807	0.0883	0.0879	0.0869	0.088	0.0892	0.1122	0.1134	0.1287	0.1092	0.1124	0.1317	0.0315	0.0251	0.0408	0.0223	0.0244	0.0425
1.60011	0.0816	0.0885	0.0883	0.0868	0.0861	0.0884	0.1151	0.1164	0.1346	0.1121	0.1154	0.1376	0.0335	0.0279	0.0463	0.0253	0.0293	0.0492
1.70011	0.0806	0.0884	0.0879	0.0868	0.0866	0.0885	0.1193	0.12	0.1392	0.1163	0.119	0.1422	0.0387	0.0316	0.0513	0.0295	0.0324	0.0537
1.80014	0.0811	0.0896	0.0881	0.0873	0.0859	0.0883	0.1224	0.1243	0.143	0.1194	0.1233	0.146	0.0413	0.0347	0.0549	0.0321	0.0374	0.0577
1.90014	0.0809	0.0898	0.0878	0.0879	0.0873	0.0883	0.1269	0.1285	0.148	0.1239	0.1275	0.151	0.046	0.0387	0.0602	0.036	0.0402	0.0627
2.00014	0.0812	0.0908	0.0876	0.0879	0.0884	0.0891	0.1316	0.1343	0.1532	0.1286	0.1333	0.1562	0.0504	0.0435	0.0656	0.0407	0.0449	0.0671
2.10017	0.0813	0.0908	0.0879	0.086	0.0856	0.0871	0.1398	0.1408	0.1625	0.1368	0.1398	0.1655	0.0585	0.05	0.0746	0.0508	0.0542	0.0784
2.20017	0.0806	0.0907	0.0878	0.0878	0.0882	0.0888	0.1461	0.1499	0.1703	0.1431	0.1489	0.1733	0.0655	0.0592	0.0825	0.0553	0.0607	0.0845
2.30019	0.0814	0.0914	0.0879	0.0865	0.0864	0.0875	0.1546	0.1577	0.1808	0.1516	0.1567	0.1838	0.0732	0.0663	0.0929	0.0651	0.0703	0.0963
2.40019	0.0809	0.0914	0.0877	0.0869	0.087	0.0887	0.1639	0.1681	0.1898	0.1609	0.1671	0.1928	0.083	0.0767	0.1021	0.074	0.0801	0.1041
2.50019	0.0813	0.0914	0.0878	0.0866	0.0859	0.0881	0.1763	0.1804	0.2025	0.1733	0.1794	0.2055	0.095	0.089	0.1147	0.0867	0.0935	0.1174
2.60022	0.0807	0.0911	0.0878	0.0847	0.0852	0.0868	0.1872	0.1937	0.2161	0.1842	0.1927	0.2191	0.1065	0.1026	0.1283	0.0995	0.1075	0.1323
2.70022	0.0812	0.0907	0.0878	0.087	0.0875	0.089	0.2026	0.2087	0.2304	0.1996	0.2077	0.2334	0.1214	0.118	0.1426	0.1126	0.1202	0.1444
2.80025	0.0808	0.0901	0.0877	0.0865	0.0877	0.0882	0.2168	0.2233	0.246	0.2138	0.2223	0.249	0.136	0.1332	0.1583	0.1273	0.1346	0.1608
2.90025	0.0817	0.0903	0.0878	0.0849	0.0853	0.0878	0.2343	0.2403	0.264	0.2313	0.2393	0.267	0.1526	0.15	0.1762	0.1464	0.154	0.1792
3.00025	0.0809	0.0896	0.0878	0.0853	0.0866	0.0871	0.2527	0.2608	0.2777	0.2497	0.2598	0.2807	0.1718	0.1712	0.1899	0.1644	0.1732	0.1936
3.10028	0.0803	0.0895	0.0878	0.0873	0.0864	0.0874	0.2731	0.2783	0.2953	0.2701	0.2773	0.2983	0.1928	0.1888	0.2075	0.1828	0.1909	0.2109
3.20028	0.0808	0.0893	0.0878	0.0863	0.0861	0.0867	0.2958	0.3015	0.3142	0.2928	0.3005	0.3172	0.215	0.2122	0.2264	0.2065	0.2144	0.2305
3.30031	0.0809	0.0892	0.0881	0.0871	0.0882	0.0884	0.3181	0.3235	0.3274	0.3151	0.3225	0.3304	0.2372	0.2343	0.2393	0.228	0.2343	0.242
3.40031	0.0817	0.0889	0.0879	0.0872	0.087	0.088	0.3405	0.3429	0.3428	0.3375	0.3419	0.3458	0.2588	0.254	0.2549	0.2503	0.2549	0.2578
3.50031	0.0813	0.0886	0.0878	0.0876	0.0878	0.0876	0.3646	0.3648	0.3576	0.3616	0.3638	0.3606	0.2833	0.2762	0.2698	0.274	0.276	0.273
3.60033	0.0816	0.0886	0.0877	0.0879	0.0869	0.0886	0.3903	0.3866	0.3739	0.3873	0.3856	0.3769	0.3087	0.298	0.2862	0.2994	0.2987	0.2883
3.70033	0.0818	0.0886	0.0876	0.0853	0.0861	0.0878	0.4144	0.4082	0.3868	0.4114	0.4072	0.3898	0.3326	0.3196	0.2992	0.3261	0.3211	0.302
3.80033	0.0816	0.0886	0.0877	0.0876	0.0869	0.0876	0.4403	0.431	0.4054	0.4373	0.43	0.4084	0.3587	0.3424	0.3177	0.3497	0.3431	0.3208
3.90036	0.0815	0.0885	0.0876	0.0876	0.0871	0.0881	0.4668	0.4543	0.4199	0.4638	0.4533	0.4229	0.3853	0.3658	0.3323	0.3762	0.3662	0.3348
4.00036	0.0811	0.0885	0.0879	0.0868	0.0869	0.0885	0.4874	0.4771	0.4354	0.4844	0.4761	0.4384	0.4063	0.3886	0.3475	0.3976	0.3892	0.3499
4.10039	0.0812	0.0887	0.088	0.0873	0.0882	0.0889	0.5111	0.4998	0.4542	0.5081	0.4988	0.4572	0.4299	0.4111	0.3662	0.4208	0.4106	0.3683
4.20039	0.0817	0.0885	0.0877	0.0856	0.0877	0.0871	0.5309	0.5199	0.4673	0.5279	0.5189	0.4703	0.4492	0.4314	0.3796	0.4423	0.4312	0.3832
4.30042	0.0818	0.0887	0.0878	0.0865	0.0864	0.0886	0.5538	0.5442	0.4855	0.5508	0.5432	0.4885	0.472	0.4555	0.3977	0.4643	0.4568	0.3999
4.40042	0.0811	0.0886	0.0877	0.0849	0.0855	0.0865	0.5725	0.5627	0.5009	0.5695	0.5617	0.5039	0.4914	0.4741	0.4132	0.4846	0.4762	0.4174
4.50042	0.0813	0.0888	0.0879	0.0861	0.0862	0.0874	0.591	0.5826	0.5167	0.588	0.5816	0.5197	0.5097	0.4938	0.4288	0.5019	0.4954	0.4323
4.60044	0.0811	0.0887	0.0877	0.0868	0.088	0.0883	0.6049	0.598	0.53	0.6019	0.597	0.533	0.5238	0.5093	0.4423	0.5151	0.509	0.4447
4.70044	0.0817	0.0888	0.0879	0.0867	0.0876	0.0883	0.6227	0.6143	0.5483	0.6197	0.6133	0.5513	0.541	0.5255	0.4604	0.533	0.5257	0.463
4.80047	0.0819	0.0889	0.088	0.0868	0.087	0.0885	0.6366	0.6273	0.5661	0.6336	0.6263	0.5691	0.5547	0.5384	0.4781	0.5468	0.5393	0.4806
4.90047	0.0816	0.0889	0.0878	0.0862	0.0865	0.0877	0.6442	0.6391	0.5793	0.6412	0.6381	0.5823	0.5626	0.5502	0.4915	0.555	0.5516	0.4946
5.00047	0.0818	0.0887	0.0878	0.0873	0.0869	0.0882	0.6569	0.6519	0.5908	0.6539	0.6509	0.5938	0.5751	0.5632	0.503	0.5666	0.564	0.5056
5.1005	0.0817	0.0889	0.0879	0.0864	0.0874	0.089	0.6653	0.6594	0.6036	0.6623	0.6584	0.6066	0.5836	0.5705	0.5157	0.5759	0.571	0.5176
5.2005	0.082	0.089	0.0879	0.0874	0.0885	0.089	0.6692	0.6672	0.6126	0.6662	0.6662	0.6156	0.5872	0.5782	0.5247	0.5788	0.5777	0.5266
5.30053	0.0816	0.0886	0.0878	0.0853	0.0857	0.0879	0.6746	0.6737	0.626	0.6716	0.6727	0.629	0.593	0.5851	0.5382	0.5863	0.587	0.5411
5.40053	0.0819	0.0887	0.0879	0.0869	0.087	0.0889	0.6791	0.6821	0.6359	0.6761	0.6811	0.6389	0.5972	0.5934	0.548	0.5892	0.5941	0.55
5.50053	0.0814	0.0886	0.0879	0.0868	0.0879	0.088	0.6852	0.69	0.6466	0.6822	0.689	0.6496	0.6038	0.6014	0.5587	0.5954	0.6011	0.5616
5.60056	0.0815	0.0887	0.0879	0.0861	0.0863	0.0863	0.6904	0.6978	0.6582	0.6874	0.6968	0.6612	0.6089	0.6091	0.5703	0.6013	0.6105	0.5749
5.70056	0.0817	0.0887	0.088	0.0864	0.0865	0.0893	0.6992	0.7061	0.6704	0.6962	0.7051	0.6734	0.6175	0.6174	0.5824	0.6098	0.6186	0.5841
5.80058	0.0817	0.0886	0.0879	0.087	0.0883	0.0877	0.7045	0.7125	0.6805	0.7015	0.7115	0.6835	0.6228	0.6239	0.5926	0.6145	0.6232	0.5958
5.90058	0.0814	0.0884	0.0876	0.0876	0.0885	0.0897	0.7112	0.7218	0.6901	0.7082	0.7208	0.6931	0.6298	0.6334	0.6025	0.6206	0.6323	0.6034
6.00061	0.0814	0.0886	0.0878	0.0857	0.0864	0.0882	0.717	0.7283	0.7023	0.714	0.7273	0.7053	0.6356	0.6397	0.6145	0.6283	0.6409	0.6171
6.10061	0.0815	0.0884	0.0877	0.0863	0.0874	0.0886	0.7251	0.7373	0.7118	0.7221	0.7363	0.7148	0.6436	0.6489	0.6241	0.6358	0.6489	0.6262
6.20061	0.0819	0.0887	0.0879	0.0865	0.0876	0.0891	0.731	0.7426	0.7206	0.728	0.7416	0.7236	0.6491	0.6539	0.6327	0.6415	0.654	0.6345
6.30064	0.0814	0.0886	0.0877	0.0869	0.0874	0.0874	0.7406	0.7517	0.7305	0.7376	0.7507	0.7335	0.6592	0.6631	0.6428	0.6507	0.6633	0.6461
6.40064	0.0809	0.0887	0.0878	0.0875	0.0876	0.0879	0.7483	0.7595	0.7392	0.7453	0.7585	0.7422	0.6674	0.6708	0.6514	0.6578	0.6709	0.6543
6.50064	0.0815	0.0886	0.0878	0.0876	0.0879	0.0889	0.7548	0.7663	0.7489	0.7518	0.7653	0.7519	0.6733	0.6777	0.6611	0.6642	0.6774	0.663
6.60067	0.0814	0.0889	0.0879	0.0864	0.087	0.0886	0.7604	0.7728	0.755	0.7574	0.7718	0.758	0.679	0.6839	0.6671	0.671	0.6848	0.6694
6.70067	0.081	0.0891	0.0879	0.0873	0.0865	0.0877	0.7681	0.7805	0.7629	0.7651	0.7795	0.7659	0.6871	0.6914	0.675	0.6778	0.693	0.6782
6.80069	0.0816	0.0889	0.0876	0.0878	0.0868	0.0887	0.7717	0.7835	0.7697	0.7687	0.7825	0.7727	0.6901	0.6946	0.6821	0.6809	0.6957	0.684
6.90069	0.0813	0.089	0.0878	0.0852	0.0853	0.0871	0.78	0.7902	0.7773	0.777	0.7892	0.7803	0.6987	0.7012	0.6895	0.6918	0.7039	0.6932
7.00069	0.081	0.0891	0.0877	0.0867	0.0862	0.0875	0.7792	0.7929	0.7824	0.7762	0.7919	0.7854	0.6982	0.7038	0.6947	0.6895	0.7057	0.6979
7.10072	0.081	0.0889	0.0879	0.0859	0.0853	0.0885	0.7888	0.7991	0.7884	0.7858	0.7981	0.7914	0.7078	0.7102	0.7005	0.6999	0.7128	0.7029
7.20072	0.0818	0.0888	0.0879	0.0867	0.0872	0.0895	0.7926	0.8044	0.7965	0.7896	0.8034	0.7995	0.7108	0.7156	0.7086	0.7029	0.7162	0.71
7.30075	0.0816	0.0888	0.0877	0.086	0.0855	0.0867	0.7966	0.8084	0.8011	0.7936	0.8074	0.8041	0.715	0.7196	0.7134	0.7076	0.7219	0.7174
7.40075	0.0811	0.0889	0.0878	0.0884	0.0876	0.0886	0.8016	0.8114	0.8079	0.7986	0.8104	0.8109	0.7205	0.7225	0.7201	0.7102	0.7228	0.7223
7.50078	0.0817	0.0889	0.0878	0.0867	0.0857	0.0878	0.8047	0.816	0.8137	0.8017	0.815	0.8167	0.723	0.7271	0.7259	0.715	0.7293	0.7289
7.60078	0.0815	0.0891	0.0878	0.0859	0.0858	0.0869	0.8085	0.8192	0.8187	0.8055	0.8182	0.8217	0.727	0.7301	0.7309	0.7196	0.7324	0.7348
7.70078	0.0818	0.089	0.0878	0.087	0.0866	0.088	0.8177	0.8238	0.8232	0.8147	0.8228	0.8262	0.7359	0.7348	0.7354	0.7277	0.7362	0.7382
7.80081	0.0813	0.0889	0.0876	0.0872	0.0863	0.0874	0.822	0.83	0.8307	0.819	0.829	0.8337	0.7407	0.7411	0.7431	0.7318	0.7427	0.7463
7.90081	0.0816	0.089	0.088	0.0868	0.0875	0.0897	0.8277	0.8358	0.838	0.8247	0.8348	0.841	0.7461	0.7468	0.75	0.7379	0.7473	0.7513
8.00083	0.0814	0.0891	0.0878	0.0865	0.086	0.0878	0.8307	0.839	0.8411	0.8277	0.838	0.8441	0.7493	0.7499	0.7533	0.7412	0.752	0.7563
8.10083	0.0811	0.0888	0.0877	0.0862	0.087	0.0884	0.8366	0.8429	0.8444	0.8336	0.8419	0.8474	0.7555	0.7541	0.7567	0.7474	0.7549	0.759
8.20083	0.0811	0.089	0.088	0.0877	0.0881	0.0896	0.8382	0.8456	0.8488	0.8352	0.8446	0.8518	0.7571	0.7566	0.7608	0.7475	0.7565	0.7622
8.30086	0.0815	0.0888	0.0877	0.0857	0.0858	0.088	0.8453	0.8502	0.8536	0.8423	0.8492	0.8566	0.7638	0.7614	0.7659	0.7566	0.7634	0.7686
8.40086	0.0809	0.0887	0.0877	0.0864	0.0881	0.0882	0.8459	0.8516	0.8575	0.8429	0.8506	0.8605	0.765	0.7629	0.7698	0.7565	0.7625	0.7723
8.50089	0.0813	0.0888	0.0877	0.0869	0.0876	0.0879	0.849	0.8558	0.8605	0.846	0.8548	0.8635	0.7677	0.767	0.7728	0.7591	0.7672	0.7756
8.60089	0.0818	0.0891	0.088	0.0873	0.0874	0.0885	0.8513	0.8586	0.8658	0.8483	0.8576	0.8688	0.7695	0.7695	0.7778	0.761	0.7702	0.7803
8.70089	0.0812	0.0887	0.0877	0.0861	0.0859	0.0877	0.8549	0.8599	0.8671	0.8519	0.8589	0.8701	0.7737	0.7712	0.7794	0.7658	0.773	0.7824
8.80092	0.081	0.0888	0.0878	0.0867	0.087	0.0889	0.8604	0.8652	0.8718	0.8574	0.8642	0.8748	0.7794	0.7764	0.784	0.7707	0.7772	0.7859
8.90092	0.0811	0.0888	0.0877	0.0871	0.0868	0.0877	0.8629	0.8673	0.8772	0.8599	0.8663	0.8802	0.7818	0.7785	0.7895	0.7728	0.7795	0.7925
9.00094	0.0815	0.0888	0.0877	0.088	0.0877	0.0883	0.8668	0.8705	0.8785	0.8638	0.8695	0.8815	0.7853	0.7817	0.7908	0.7758	0.7818	0.7932
9.10094	0.0811	0.0888	0.0878	0.0875	0.087	0.0889	0.8703	0.8727	0.881	0.8673	0.8717	0.884	0.7892	0.7839	0.7932	0.7798	0.7847	0.7951
9.20094	0.0817	0.0888	0.0878	0.0872	0.0865	0.089	0.8709	0.8737	0.8839	0.8679	0.8727	0.8869	0.7892	0.7849	0.7961	0.7807	0.7862	0.7979
9.30097	0.0812	0.0888	0.0877	0.0862	0.087	0.0871	0.8737	0.878	0.8879	0.8707	0.877	0.8909	0.7925	0.7892	0.8002	0.7845	0.79	0.8038
9.40097	0.0815	0.0888	0.0879	0.0863	0.0879	0.088	0.8775	0.8798	0.8949	0.8745	0.8788	0.8979	0.796	0.791	0.807	0.7882	0.7909	0.8099
9.501	0.0809	0.089	0.0878	0.0871	0.088	0.0894	0.8823	0.8824	0.8953	0.8793	0.8814	0.8983	0.8014	0.7934	0.8075	0.7922	0.7934	0.8089
9.601	0.0811	0.089	0.0879	0.0871	0.0876	0.0879	0.8838	0.8851	0.8995	0.8808	0.8841	0.9025	0.8027	0.7961	0.8116	0.7937	0.7965	0.8146
9.701	0.0811	0.0888	0.0876	0.0873	0.088	0.0877	0.889	0.8873	0.9023	0.886	0.8863	0.9053	0.8079	0.7985	0.8147	0.7987	0.7983	0.8176
9.80103	0.0811	0.0888	0.0878	0.0866	0.0863	0.0877	0.8909	0.8909	0.905	0.8879	0.8899	0.908	0.8098	0.8021	0.8172	0.8013	0.8036	0.8203
9.90103	0.0817	0.0888	0.0878	0.086	0.0876	0.0876	0.8921	0.8925	0.9089	0.8891	0.8915	0.9119	0.8104	0.8037	0.8211	0.8031	0.8039	0.8243
10.0011	0.0812	0.089	0.0878	0.0875	0.0868	0.0881	0.8941	0.8931	0.9106	0.8911	0.8921	0.9136	0.8129	0.8041	0.8228	0.8036	0.8053	0.8255
10.1011	0.0815	0.0891	0.0877	0.0815	0.0891	0.0877	0.9015	0.898	0.9163	0.8985	0.897	0.9193	0.82	0.8089	0.8286	0.817	0.8079	0.8316
10.2011	0.0811	0.0893	0.088	0.0811	0.0893	0.088	0.9037	0.9003	0.9195	0.9007	0.8993	0.9225	0.8226	0.811	0.8315	0.8196	0.81	0.8345
10.3011	0.081	0.0891	0.0882	0.081	0.0891	0.0882	0.906	0.9032	0.9225	0.903	0.9022	0.9255	0.825	0.8141	0.8343	0.822	0.8131	0.8373
10.4011	0.0814	0.0895	0.0878	0.0814	0.0895	0.0878	0.904	0.903	0.9237	0.901	0.902	0.9267	0.8226	0.8135	0.8359	0.8196	0.8125	0.8389
10.5011	0.0808	0.0892	0.0877	0.0808	0.0892	0.0877	0.9055	0.9034	0.9245	0.9025	0.9024	0.9275	0.8247	0.8142	0.8368	0.8217	0.8132	0.8398
10.6011	0.0814	0.0895	0.088	0.0814	0.0895	0.088	0.9126	0.9082	0.93	0.9096	0.9072	0.933	0.8312	0.8187	0.842	0.8282	0.8177	0.845
10.7011	0.0813	0.0893	0.088	0.0813	0.0893	0.088	0.9113	0.9089	0.9322	0.9083	0.9079	0.9352	0.83	0.8196	0.8442	0.827	0.8186	0.8472
10.8011	0.0815	0.0894	0.0879	0.0815	0.0894	0.0879	0.9175	0.9126	0.9342	0.9145	0.9116	0.9372	0.836	0.8232	0.8463	0.833	0.8222	0.8493
10.9011	0.081	0.0893	0.0879	0.081	0.0893	0.0879	0.9163	0.9126	0.9376	0.9133	0.9116	0.9406	0.8353	0.8233	0.8497	0.8323	0.8223	0.8527
11.0011	0.081	0.0893	0.0878	0.081	0.0893	0.0878	0.9169	0.9164	0.94	0.9139	0.9154	0.943	0.8359	0.8271	0.8522	0.8329	0.8261	0.8552
11.1012	0.0813	0.0893	0.0878	0.0813	0.0893	0.0878	0.9239	0.9179	0.9421	0.9209	0.9169	0.9451	0.8426	0.8286	0.8543	0.8396	0.8276	0.8573
11.2012	0.0812	0.0894	0.0879	0.0812	0.0894	0.0879	0.9252	0.9194	0.9455	0.9222	0.9184	0.9485	0.844	0.83	0.8576	0.841	0.829	0.8606
11.3012	0.0811	0.0894	0.0879	0.0811	0.0894	0.0879	0.9246	0.9202	0.9459	0.9216	0.9192	0.9489	0.8435	0.8308	0.858	0.8405	0.8298	0.861
11.4012	0.0816	0.0893	0.0879	0.0816	0.0893	0.0879	0.9299	0.9237	0.9508	0.9269	0.9227	0.9538	0.8483	0.8344	0.8629	0.8453	0.8334	0.8659
11.5012	0.0812	0.0892	0.0878	0.0812	0.0892	0.0878	0.9342	0.9255	0.9557	0.9312	0.9245	0.9587	0.853	0.8363	0.8679	0.85	0.8353	0.8709
11.6012	0.0812	0.0892	0.0878	0.0812	0.0892	0.0878	0.9321	0.9267	0.9543	0.9291	0.9257	0.9573	0.8509	0.8375	0.8665	0.8479	0.8365	0.8695
11.7012	0.0813	0.0895	0.088	0.0813	0.0895	0.088	0.9376	0.9312	0.96	0.9346	0.9302	0.963	0.8563	0.8417	0.872	0.8533	0.8407	0.875
11.8013	0.081	0.0892	0.0879	0.081	0.0892	0.0879	0.9368	0.9308	0.9597	0.9338	0.9298	0.9627	0.8558	0.8416	0.8718	0.8528	0.8406	0.8748
11.9013	0.081	0.0893	0.0879	0.081	0.0893	0.0879	0.9377	0.9325	0.9625	0.9347	0.9315	0.9655	0.8567	0.8432	0.8746	0.8537	0.8422	0.8776
12.0013	0.0812	0.0892	0.088	0.0812	0.0892	0.088	0.9397	0.9339	0.9645	0.9367	0.9329	0.9675	0.8585	0.8447	0.8765	0.8555	0.8437	0.8795
12.1013	0.0813	0.0891	0.0879	0.0813	0.0891	0.0879	0.9435	0.9363	0.9668	0.9405	0.9353	0.9698	0.8622	0.8472	0.8789	0.8592	0.8462	0.8819
12.2013	0.0817	0.0894	0.0878	0.0817	0.0894	0.0878	0.9481	0.9409	0.9732	0.9451	0.9399	0.9762	0.8664	0.8515	0.8854	0.8634	0.8505	0.8884
12.3013	0.0818	0.0892	0.0879	0.0818	0.0892	0.0879	0.9485	0.9423	0.9744	0.9455	0.9413	0.9774	0.8667	0.8531	0.8865	0.8637	0.8521	0.8895
12.4013	0.0813	0.0892	0.0878	0.0813	0.0892	0.0878	0.9494	0.9424	0.9758	0.9464	0.9414	0.9788	0.8681	0.8532	0.888	0.8651	0.8522	0.891
12.5013	0.0813	0.0891	0.0879	0.0813	0.0891	0.0879	0.9547	0.9462	0.9788	0.9517	0.9452	0.9818	0.8734	0.8571	0.8909	0.8704	0.8561	0.8939
12.6013	0.0811	0.0891	0.0878	0.0811	0.0891	0.0878	0.9575	0.9472	0.9816	0.9545	0.9462	0.9846	0.8764	0.8581	0.8938	0.8734	0.8571	0.8968
12.7014	0.0807	0.0893	0.0879	0.0807	0.0893	0.0879	0.9566	0.9492	0.9841	0.9536	0.9482	0.9871	0.8759	0.8599	0.8962	0.8729	0.8589	0.8992
12.8014	0.081	0.0892	0.0881	0.081	0.0892	0.0881	0.9623	0.9533	0.9887	0.9593	0.9523	0.9917	0.8813	0.8641	0.9006	0.8783	0.8631	0.9036
12.9014	0.0812	0.0891	0.0879	0.0812	0.0891	0.0879	0.9604	0.9528	0.9885	0.9574	0.9518	0.9915	0.8792	0.8637	0.9006	0.8762	0.8627	0.9036
13.0014	0.0812	0.0891	0.0878	0.0812	0.0891	0.0878	0.9649	0.9551	0.9909	0.9619	0.9541	0.9939	0.8837	0.866	0.9031	0.8807	0.865	0.9061
13.1014	0.081	0.0893	0.088	0.081	0.0893	0.088	0.9648	0.9567	0.9922	0.9618	0.9557	0.9952	0.8838	0.8674	0.9042	0.8808	0.8664	0.9072
13.2014	0.081	0.0892	0.0878	0.081	0.0892	0.0878	0.9681	0.9586	0.9952	0.9651	0.9576	0.9982	0.8871	0.8694	0.9074	0.8841	0.8684	0.9104
13.3014	0.0813	0.0893	0.0881	0.0813	0.0893	0.0881	0.9671	0.959	0.9967	0.9641	0.958	0.9997	0.8858	0.8697	0.9086	0.8828	0.8687	0.9116
13.4014	0.0808	0.0893	0.0877	0.0808	0.0893	0.0877	0.9721	0.962	0.9986	0.9691	0.961	1.0016	0.8913	0.8727	0.9109	0.8883	0.8717	0.9139
13.5014	0.081	0.0891	0.0879	0.081	0.0891	0.0879	0.9732	0.964	1.0004	0.9702	0.963	1.0034	0.8922	0.8749	0.9125	0.8892	0.8739	0.9155
13.6014	0.0813	0.089	0.088	0.0813	0.089	0.088	0.9752	0.9663	1.0029	0.9722	0.9653	1.0059	0.8939	0.8773	0.9149	0.8909	0.8763	0.9179
13.7014	0.0808	0.089	0.0877	0.0808	0.089	0.0877	0.9818	0.9696	1.0055	0.9788	0.9686	1.0085	0.901	0.8806	0.9178	0.898	0.8796	0.9208
13.8015	0.0808	0.089	0.088	0.0808	0.089	0.088	0.9795	0.9693	1.006	0.9765	0.9683	1.009	0.8987	0.8803	0.918	0.8957	0.8793	0.921
13.9015	0.0809	0.0893	0.088	0.0809	0.0893	0.088	0.9802	0.9707	1.0082	0.9772	0.9697	1.0112	0.8993	0.8814	0.9202	0.8963	0.8804	0.9232
14.0015	0.081	0.0892	0.0878	0.081	0.0892	0.0878	0.982	0.9728	1.0087	0.979	0.9718	1.0117	0.901	0.8836	0.9209	0.898	0.8826	0.9239

## Sheet: _flu_mscarlet
time (h)	blank1	blank2	blank3	blank4	blank5	blank6	rpoS1	rpoS2	rpoS3	rpoS4	rpoS5	rpoS6	rpoS-B	rpoS-B	rpoS-B	rpoS-B	rpoS-B	rpoS-B
0	35	27	43	31	37	46	38	28	31	36	33	28	3	1	-12	5	-4	-18
0.0999444	38	31	41	35	39	40	37	33	33	35	38	30	-1	2	-8	0	-1	-10
0.199944	32	26	36	30	43	45	26	24	36	24	29	33	-6	-2	0	-6	-14	-12
0.299944	42	23	36	26	37	44	37	32	29	35	37	26	-5	9	-7	9	0	-18
0.399972	33	31	42	41	39	40	30	34	33	28	39	30	-3	3	-9	-13	0	-10
0.499972	39	31	43	39	37	43	34	30	38	32	35	35	-5	-1	-5	-7	-2	-8
0.6	34	35	39	35	41	33	34	30	33	32	35	30	0	-5	-6	-3	-6	-3
0.7	38	19	33	32	37	44	32	33	26	30	38	23	-6	14	-7	-2	1	-21
0.8	29	31	29	38	41	37	36	26	22	34	31	19	7	-5	-7	-4	-10	-18
0.900028	34	26	32	40	30	37	26	24	36	24	29	33	-8	-2	4	-16	-1	-4
1.00003	39	30	30	37	35	34	37	32	29	35	37	26	-2	2	-1	-2	2	-8
1.10006	33	28	34	30	37	40	30	25	21	28	30	18	-3	-3	-13	-2	-7	-22
1.20006	35	28	34	39	37	44	34	30	28	32	35	25	-1	2	-6	-7	-2	-19
1.30006	38	27	40	40	40	33	34	30	33	32	35	30	-4	3	-7	-8	-5	-3
1.40008	31	23	38	44	39	38	36	26	22	34	31	19	5	3	-16	-10	-8	-19
1.50008	29	37	34	36	42	35	26	24	36	24	29	33	-3	-13	2	-12	-13	-2
1.60011	37	30	36	32	35	41	37	32	29	35	37	26	0	2	-7	3	2	-15
1.70011	30	22	33	40	36	32	30	25	21	28	30	18	0	3	-12	-12	-6	-14
1.80014	35	29	31	35	50	39	34	30	28	32	35	25	-1	1	-3	-3	-15	-14
1.90014	35	34	41	37	40	33	34	30	33	32	35	30	-1	-4	-8	-5	-5	-3
2.00014	31	31	42	31	30	39	34	26	30	32	31	27	3	-5	-12	1	1	-12
2.10017	30	22	33	35	39	43	32	25	21	30	30	18	2	3	-12	-5	-9	-25
2.20017	35	23	39	35	41	37	42	30	22	40	35	19	7	7	-17	5	-6	-18
2.30019	28	35	36	32	37	37	36	23	34	34	28	31	8	-12	-2	2	-9	-6
2.40019	32	31	34	30	45	35	32	27	30	30	32	27	0	-4	-4	0	-13	-8
2.50019	31	30	31	36	27	41	32	26	29	30	31	26	1	-4	-2	-6	4	-15
2.60022	31	25	36	40	41	36	32	26	24	30	31	21	1	1	-12	-10	-10	-15
2.70022	30	27	32	45	38	37	36	25	26	34	30	23	6	-2	-6	-11	-8	-14
2.80025	28	22	33	35	40	35	27	23	21	25	28	18	-1	1	-12	-10	-12	-17
2.90025	32	36	27	41	41	33	32	29	32	30	34	29	0	-7	5	-11	-7	-4
3.00025	35	23	34	39	36	33	33	34	25	31	39	22	-2	11	-9	-8	3	-11
3.10028	35	25	29	33	41	38	24	33	32	22	38	29	-11	8	3	-11	-3	-9
3.20028	34	26	29	39	41	42	39	27	28	37	32	25	5	1	-1	-2	-9	-17
3.30031	26	20	33	35	37	45	34	25	33	32	30	30	8	5	0	-3	-7	-15
3.40031	36	24	40	37	36	44	39	35	32	37	40	29	3	11	-8	0	4	-15
3.50031	34	33	35	37	39	35	35	36	30	33	41	27	1	3	-5	-4	2	-8
3.60033	34	20	33	33	40	28	41	28	32	39	33	29	7	8	-1	6	-7	1
3.70033	36	29	31	38	41	36	45	34	27	43	39	24	9	5	-4	5	-2	-12
3.80033	38	28	33	36	40	37	39	33	35	37	38	32	1	5	2	1	-2	-5
3.90036	41	28	29	42	32	39	42	35	40	40	40	37	1	7	11	-2	8	-2
4.00036	36	26	31	35	38	29	40	27	30	38	32	27	4	1	-1	3	-6	-2
4.10039	36	30	29	34	40	40	42	27	25	40	32	22	6	-3	-4	6	-8	-18
4.20039	30	27	35	33	33	34	35	26	25	33	31	22	5	-1	-10	0	-2	-12
4.30042	33	30	34	40	40	34	31	30	33	29	35	30	-2	0	-1	-11	-5	-4
4.40042	34	27	34	42	39	33	33	24	26	31	29	23	-1	-3	-8	-11	-10	-10
4.50042	32	26	37	38	36	38	33	28	28	31	33	25	1	2	-9	-7	-3	-13
4.60044	29	26	33	36	36	34	38	23	28	36	28	25	9	-3	-5	0	-8	-9
4.70044	32	31	32	41	38	37	34	36	29	32	41	26	2	5	-3	-9	3	-11
4.80047	33	26	31	40	37	35	39	29	32	37	34	29	6	3	1	-3	-3	-6
4.90047	35	34	34	33	33	31	40	24	21	38	29	18	5	-10	-13	5	-4	-13
5.00047	32	29	34	33	29	30	38	33	28	36	38	25	6	4	-6	3	9	-5
5.1005	31	30	33	45	32	34	35	27	21	33	32	18	4	-3	-12	-12	0	-16
5.2005	35	27	38	33	30	32	40	28	26	38	33	23	5	1	-12	5	3	-9
5.30053	31	23	37	33	35	37	37	31	32	35	36	29	6	8	-5	2	1	-8
5.40053	36	32	31	38	37	44	44	32	35	42	37	32	8	0	4	4	0	-12
5.50053	32	32	32	32	36	39	44	41	39	42	46	36	12	9	7	10	10	-3
5.60056	38	28	34	34	42	37	47	42	42	45	47	39	9	14	8	11	5	2
5.70056	29	27	32	38	35	45	50	43	44	48	48	41	21	16	12	10	13	-4
5.80058	33	21	31	35	36	33	54	43	46	52	48	43	21	22	15	17	12	10
5.90058	37	32	36	37	33	29	56	50	47	54	55	44	19	18	11	17	22	15
6.00061	27	29	31	31	34	42	58	54	49	56	59	46	31	25	18	25	25	4
6.10061	31	26	40	35	26	38	59	54	52	57	59	49	28	28	12	22	33	11
6.20061	30	33	33	30	37	35	65	59	55	63	64	52	35	26	22	33	27	17
6.30064	29	27	40	29	34	37	66	59	56	64	64	53	37	32	16	35	30	16
6.40064	35	19	33	38	28	39	69	61	60	67	66	57	34	42	27	29	38	18
6.50064	37	29	30	34	39	27	74	64	68	72	69	65	37	35	38	38	30	38
6.60067	37	26	31	31	32	40	77	70	71	75	75	68	40	44	40	44	43	28
6.70067	31	26	35	40	35	30	77	71	71	75	76	68	46	45	36	35	41	38
6.80069	35	34	29	33	42	34	77	78	80	75	83	77	42	44	51	42	41	43
6.90069	31	29	34	32	36	33	85	84	82	83	89	79	54	55	48	51	53	46
7.00069	30	25	33	36	41	30	87	81	85	85	86	82	57	56	52	49	45	52
7.10072	28	33	34	29	29	38	93	89	89	91	94	86	65	56	55	62	65	48
7.20072	38	26	28	30	30	34	95	90	90	101	108	103	57	64	62	71	78	69
7.30075	28	21	24	30	33	40	103	93	96	110	107	117	75	72	72	80	74	77
7.40075	31	21	31	36	36	34	118	104	100	126	127	124	87	83	69	90	91	90
7.50078	25	27	36	33	36	35	118	107	120	117	133	125	93	80	84	84	97	90
7.60078	32	22	26	31	37	46	113	113	110	121	128	122	81	91	84	90	91	76
7.70078	33	26	41	35	39	40	134	115	111	129	122	124	101	89	70	94	83	84
7.80081	34	19	31	30	43	45	130	131	130	127	134	138	96	112	99	97	91	93
7.90081	32	18	28	26	37	44	130	136	128	118	134	134	98	118	100	92	97	90
8.00083	34	27	31	41	39	40	139	129	130	131	143	149	105	102	99	90	104	109
8.10083	30	23	32	39	37	43	135	131	141	139	154	146	105	108	109	100	117	103
8.20083	27	28	34	35	41	33	148	138	154	146	156	159	121	110	120	111	115	126
8.30086	21	22	24	32	37	44	153	147	140	159	163	165	132	125	116	127	126	121
8.40086	27	19	33	38	41	37	157	147	166	157	174	166	130	128	133	119	133	129
8.50089	29	24	30	40	30	37	165	157	166	163	176	160	136	133	136	123	146	123
8.60089	25	26	33	37	35	34	173	170	167	167	176	174	148	144	134	130	141	140
8.70089	28	23	33	30	37	40	186	173	187	195	191	183	158	150	154	165	154	143
8.80092	35	28	35	39	37	44	184	169	178	194	182	184	149	141	143	155	145	140
8.90092	31	28	31	40	40	33	204	183	203	180	191	188	173	155	172	140	151	155
9.00094	28	25	33	44	39	38	208	183	196	198	199	189	180	158	163	154	160	151
9.10094	31	23	34	36	42	35	214	206	210	200	194	204	183	183	176	164	152	169
9.20094	36	22	31	32	35	41	230	201	207	231	200	217	194	179	176	199	165	176
9.30097	25	24	33	40	36	32	235	223	230	216	231	221	210	199	197	176	195	189
9.40097	31	25	30	35	50	39	237	211	233	225	227	235	206	186	203	190	177	196
9.501	20	24	28	37	40	33	254	229	245	238	234	224	234	205	217	201	194	191
9.601	29	23	33	31	30	39	242	241	256	243	249	242	213	218	223	212	219	203
9.701	24	27	29	35	39	43	267	256	266	256	255	259	243	229	237	221	216	216
9.80103	31	26	27	35	41	37	286	257	286	269	272	272	255	231	259	234	231	235
9.90103	26	27	35	32	37	37	282	267	283	278	261	282	256	240	248	246	224	245
10.0011	24	28	28	30	45	35	292	268	283	280	277	275	268	240	255	250	232	240
10.1011	23	26	29	36	27	41	326	300	308	295	294	283	303	274	279	259	267	242
10.2011	27	23	31	40	41	36	304	302	348	285	295	305	277	279	317	245	254	269
10.3011	31	23	37	45	38	37	328	305	322	307	301	320	297	282	285	262	263	283
10.4011	23	24	27	35	40	35	338	328	348	310	293	315	315	304	321	275	253	280
10.5011	28	27	26	41	41	33	359	340	343	314	331	327	331	313	317	273	290	294
10.6011	28	24	27	39	36	33	344	326	365	333	320	329	316	302	338	294	284	296
10.7011	28	22	33	33	41	38	355	344	365	335	336	344	327	322	332	302	295	306
10.8011	32	25	25	39	41	42	376	347	376	371	344	346	344	322	351	332	303	304
10.9011	28	18	28	35	37	45	395	383	379	377	358	363	367	365	351	342	321	318
11.0011	24	17	26	37	36	44	411	372	400	381	371	370	387	355	374	344	335	326
11.1012	27	22	25	37	39	35	403	400	394	388	390	375	376	378	369	351	351	340
11.2012	24	26	29	33	40	28	436	397	415	422	394	399	412	371	386	389	354	371
11.3012	27	24	24	38	41	36	423	419	421	413	403	381	396	395	397	375	362	345
11.4012	25	23	30	36	40	37	446	419	443	410	407	403	421	396	413	374	367	366
11.5012	28	23	27	42	32	39	458	404	441	417	429	444	430	381	414	375	397	405
11.6012	24	16	34	35	38	29	462	444	472	422	431	441	438	428	438	387	393	412
11.7012	21	25	28	34	40	40	475	449	467	450	438	431	454	424	439	416	398	391
11.8013	21	22	29	33	33	34	491	482	471	461	447	466	470	460	442	428	414	432
11.9013	27	29	31	40	40	34	502	472	509	478	479	474	475	443	478	438	439	440
12.0013	21	24	26	42	39	33	511	514	521	468	486	478	490	490	495	426	447	445
12.1013	19	20	29	38	36	38	501	492	519	507	486	522	482	472	490	469	450	484
12.2013	24	26	24	36	36	34	533	512	528	492	526	521	509	486	504	456	490	487
12.3013	24	17	33	41	38	37	565	544	549	528	524	538	541	527	516	487	486	501
12.4013	29	18	25	40	37	35	553	524	561	549	566	558	524	506	536	509	529	523
12.5013	19	27	28	33	33	31	553	550	601	583	574	579	534	523	573	550	541	548
12.6013	29	22	29	33	29	30	591	597	582	562	596	624	562	575	553	529	567	594
12.7014	19	17	24	45	32	34	581	566	574	620	621	638	562	549	550	575	589	604
12.8014	28	17	27	33	30	32	587	595	611	613	630	634	559	578	584	580	600	602
12.9014	22	16	30	33	35	37	598	605	625	630	657	640	576	589	595	597	622	603
13.0014	26	25	27	38	37	44	619	603	622	683	678	667	593	578	595	645	641	623
13.1014	21	22	26	32	36	39	634	611	663	674	698	694	613	589	637	642	662	655
13.2014	21	25	24	34	42	37	658	651	670	714	699	700	637	626	646	680	657	663
13.3014	20	19	25	38	35	45	661	700	693	733	730	738	641	681	668	695	695	693
13.4014	20	19	23	35	36	33	694	684	704	763	741	790	674	665	681	728	705	757
13.5014	22	17	27	37	33	29	707	676	748	799	771	786	685	659	721	762	738	757
13.6014	22	20	20	31	34	42	744	729	779	843	787	808	722	709	759	812	753	766
13.7014	18	17	24	35	26	38	753	745	771	898	889	894	735	728	747	863	863	856
13.8015	29	22	27	30	37	35	771	760	821	915	965	924	742	738	794	885	928	889
13.9015	25	21	22	29	34	37	800	770	828	915	904	945	775	749	806	886	870	908
14.0015	19	23	21	38	28	39	841	810	840	976	941	957	822	787	819	938	913	918

## Sheet: mScarlet7OD
time (h)	rpoS1	rpoS2	rpoS3	rpoS4	rpoS5	rpoS6
0	144.231	82.6446	-805.369	446.429	-363.636	-1097.56
0.1	-49.5049	158.73	-544.218	0	-76.9231	-602.41
0.2	-295.567	-158.73	0	-517.241	-1021.9	-774.194
0.3	-246.305	725.806	-492.958	833.333	0	-1058.82
0.4	-155.44	220.588	-620.69	-1413.04	0	-671.141
0.5	-251.256	-69.4444	-349.65	-714.286	-151.515	-516.129
0.6	0	-333.333	-408.163	-245.902	-413.793	-169.492
0.7	-281.69	915.033	-426.829	-152.672	67.5676	-1193.18
0.8	321.101	-306.748	-416.667	-325.203	-645.161	-972.973
0.9	-355.556	-121.951	228.571	-1159.42	-59.1716	-203.046
1	-82.6446	115.607	-54.6448	-129.87	117.647	-380.952
1.1	-120	-163.934	-680.628	-139.86	-411.765	-1028.04
1.2	-37.7358	101.01	-292.683	-393.258	-97.561	-815.451
1.3	-142.349	144.231	-309.735	-441.989	-246.305	-119.522
1.4	170.068	133.333	-669.456	-505.051	-357.143	-711.61
1.5	-95.2381	-517.928	49.0196	-538.117	-532.787	-47.0588
1.6	0	71.6846	-151.188	118.577	68.2594	-304.878
1.7	0	94.9367	-233.918	-406.78	-185.185	-260.708
1.8	-24.2131	28.8184	-54.6448	-93.4579	-401.07	-242.634
1.9	-21.7391	-103.359	-132.89	-138.889	-124.378	-47.8469
2	59.5238	-114.943	-182.927	24.57	22.2717	-178.838
2.1	34.188	60	-160.858	-98.4252	-166.052	-318.878
2.2	106.87	118.243	-206.061	90.4159	-98.8468	-213.018
2.3	109.29	-180.995	-21.5285	30.722	-128.023	-62.3053
2.4	0	-52.1512	-39.1773	0	-162.297	-76.8492
2.5	10.5263	-44.9438	-17.4368	-69.2042	42.7807	-127.768
2.6	9.38967	9.74659	-93.5308	-100.503	-93.0233	-113.379
2.7	49.4234	-16.9492	-42.0757	-97.6909	-66.5557	-96.9529
2.8	-7.35294	7.50751	-75.8054	-78.5546	-89.153	-105.721
2.9	0	-46.6667	28.3768	-75.1366	-45.4545	-22.3214
3	-11.6414	64.2523	-47.3934	-48.6618	17.321	-56.8182
3.1	-57.0539	42.3729	14.4578	-60.1751	-15.715	-42.6743
3.2	23.2558	4.71254	-4.41696	-9.68523	-41.9776	-73.7527
3.3	33.7268	21.3402	0	-13.1579	-29.8762	-61.9835
3.4	11.592	43.3071	-31.3849	0	15.6924	-58.1846
3.5	3.52983	10.8617	-18.5322	-14.5985	7.24638	-29.304
3.6	22.6757	26.8456	-3.49406	20.0401	-23.4349	3.46861
3.7	27.0595	15.6446	-13.369	15.3327	-6.22859	-39.7351
3.8	2.78785	14.6028	6.29525	2.85959	-5.8292	-15.586
3.9	2.59538	19.1361	33.1026	-5.31632	21.846	-5.97372
4	9.84494	2.57334	-2.8777	7.54527	-15.4162	-5.71592
4.1	13.9567	-7.29749	-10.923	14.2586	-19.4837	-48.8732
4.2	11.1309	-2.31803	-26.3435	0	-4.63822	-31.3152
4.3	-4.23729	0	-2.51446	-23.6916	-10.9457	-10.0025
4.4	-2.035	-6.32778	-19.3611	-22.6991	-20.9996	-23.9578
4.5	1.96194	4.05022	-20.9888	-13.947	-6.05571	-30.0717
4.6	17.1821	-5.89044	-11.3045	0	-15.7171	-20.2384
4.7	3.69686	9.51475	-6.51607	-16.8856	5.70668	-23.7581
4.8	10.8167	5.57207	2.09161	-5.48647	-5.56277	-12.4844
4.9	8.88731	-18.1752	-26.4496	9.00901	-7.25163	-26.2839
5	10.433	7.10227	-11.9284	5.29474	15.9574	-9.88924
5.1	6.85401	-5.25855	-23.2693	-20.837	0	-30.9119
5.2	8.51499	1.72951	-22.8702	8.63856	5.19301	-17.0908
5.3	10.118	13.6729	-9.29023	3.41122	1.70358	-14.7847
5.4	13.3958	0	7.29927	6.78887	0	-21.8182
5.5	19.8741	14.9651	12.5291	16.7954	16.6362	-5.34188
5.6	14.7808	22.9847	14.0277	18.2937	8.19001	3.47887
5.7	34.0081	25.9151	20.6044	16.3988	21.0152	-6.84814
5.8	33.7187	35.2621	25.3122	27.6648	19.2555	16.7842
5.9	30.1683	28.4181	18.2573	27.3928	34.7936	24.8591
6	48.7728	39.0808	29.2921	39.7899	39.0076	6.48193
6.1	43.5053	43.1499	19.2277	34.6021	50.8553	17.5663
6.2	53.9208	39.7614	34.7716	51.4419	41.2844	26.7928
6.3	56.1286	48.2582	24.8911	53.7882	45.2284	24.764
6.4	50.944	62.6118	41.4492	44.0863	56.6403	27.5103
6.5	54.9532	51.6453	57.48	57.2117	44.287	57.3152
6.6	58.9102	64.3369	59.961	65.5738	62.7921	41.8285
6.7	66.948	65.0853	53.3333	51.6377	59.1631	56.0307
6.8	60.8607	63.3458	74.7691	61.6831	58.9334	62.8655
6.9	77.2864	78.437	69.6157	73.7207	75.2948	66.3589
7	81.6385	79.5681	74.8525	71.066	63.7665	74.5092
7.1	91.8339	78.851	78.5153	88.5841	91.1897	68.2885
7.2	80.1913	89.4354	87.4965	101.01	108.908	97.1831
7.3	104.895	100.056	100.925	113.058	102.507	107.332
7.4	120.749	114.879	95.82	126.725	125.899	124.602
7.5	128.631	110.026	115.718	117.483	133.004	123.474
7.6	111.417	124.64	114.927	125.069	124.249	103.43
7.7	137.247	121.121	95.1863	129.174	112.741	113.79
7.8	129.607	151.127	133.226	132.55	122.526	124.615
7.9	131.35	158.007	133.333	124.678	129.801	119.792
8	140.131	136.018	131.422	121.425	138.298	144.123
8.1	138.981	143.217	144.047	133.797	154.987	135.705
8.2	159.82	145.387	157.729	148.495	152.016	165.311
8.3	172.82	164.171	151.456	167.856	165.051	157.429
8.4	169.935	167.781	172.772	157.303	174.426	167.034
8.5	177.153	173.403	175.983	162.034	190.302	158.587
8.6	192.333	187.135	172.281	170.828	183.069	179.418
8.7	204.214	194.502	197.588	215.461	199.224	182.771
8.8	191.173	181.607	182.398	201.116	186.567	178.14
8.9	221.284	199.101	217.859	181.159	193.714	195.584
9	229.212	202.124	206.12	198.505	204.656	190.368
9.1	231.88	233.448	221.886	210.31	193.705	212.552
9.2	245.819	228.055	221.078	254.899	209.87	220.579
9.3	264.984	252.154	246.188	224.347	246.835	235.133
9.4	258.794	235.145	251.549	241.056	223.796	242.005
9.5	291.989	258.382	268.731	253.724	244.517	236.123
9.6	265.354	273.835	274.766	267.103	274.953	249.202
9.7	300.78	286.788	290.905	276.7	270.575	264.188
9.8	314.893	287.994	316.936	292.025	287.456	286.481
9.9	315.893	298.619	302.034	306.313	278.642	297.222
10	329.684	298.47	309.917	311.1	288.091	290.733
10.1	369.512	338.732	336.713	317.013	330.486	291.005
10.2	336.737	344.02	381.239	298.926	313.58	322.349
10.3	360	346.395	341.604	318.735	323.453	337.991
10.4	382.932	373.694	384.017	335.53	311.385	333.77
10.5	401.358	384.426	378.824	332.238	356.616	350.083
10.6	380.173	368.877	401.425	354.987	347.316	350.296
10.7	393.976	392.875	393.272	365.175	360.371	361.19
10.8	411.483	391.156	414.747	398.559	368.523	357.942
10.9	439.363	443.338	413.087	410.91	390.368	372.933
11	462.974	429.21	438.864	413.015	405.52	381.197
11.1	446.238	456.191	431.933	418.056	424.118	396.594
11.2	488.152	446.988	450.093	462.545	427.021	431.095
11.3	469.472	475.445	462.704	446.163	436.25	400.697
11.4	496.287	474.593	478.619	442.446	440.365	422.682
11.5	504.103	455.578	477.013	441.176	475.278	465.036
11.6	514.749	511.045	505.482	456.422	469.815	473.836
11.7	530.188	503.742	503.44	487.519	473.415	446.857
11.8	549.194	546.578	506.997	501.876	492.505	493.827
11.9	554.453	525.38	546.536	513.061	521.254	501.367
12	570.763	580.088	564.746	497.954	529.809	505.969
12.1	559.035	557.129	557.515	545.857	531.789	548.815
12.2	587.488	570.757	569.234	528.145	576.132	548.176
12.3	624.207	617.747	582.064	563.853	570.356	563.238
12.4	603.617	593.061	603.604	588.371	620.746	586.981
12.5	611.404	610.197	643.17	631.893	631.936	613.044
12.6	641.26	670.085	618.707	605.679	661.533	662.355
12.7	641.626	638.446	613.702	658.724	685.761	671.708
12.8	634.29	668.904	648.457	660.367	695.169	666.224
12.9	655.141	681.95	660.671	681.351	720.992	667.331
13	671.042	667.436	658.842	732.372	741.04	687.562
13.1	693.596	679.041	704.49	728.883	764.081	722.002
13.2	718.07	720.037	711.924	769.144	756.564	728.251
13.3	723.64	783.029	735.197	787.268	800.046	760.202
13.4	756.199	762.003	747.612	819.543	808.764	828.318
13.5	767.765	753.229	790.137	856.95	844.49	826.871
13.6	807.697	808.161	829.599	911.438	859.295	834.514
13.7	815.76	826.709	813.903	961.024	981.128	929.626
13.8	825.637	838.351	864.924	988.054	1055.38	965.255
13.9	861.781	849.784	875.897	988.508	988.187	983.536
14	912.32	890.675	889.347	1044.54	1034.44	993.614
	#DIV/0!	#DIV/0!	#DIV/0!	#DIV/0!	#DIV/0!	#DIV/0!
