# Supplementary material for: RECKLEEN: a lambda Red/CRISPR-Cas9 based single plasmid platform for fast, efficient, markerless, and scarless genome editing in Klebsiella pneumoniae
Source: Research Square preprint supplement (doi:10.21203/rs.3.rs-5859838/v1), 2025-02-28
Supplement: Supplementary file 34 [file rpsB.xlsx]

## Sheet: OD600
time (h)	blank1	blank2	blank3	blank4	blank5	blank6	rpsB1	rpsB2	rpsB3	rpsB4	rpsB5	rpsB6	rpsB-B	rpsB-B	rpsB-B	rpsB-B	rpsB-B	rpsB-B
0	0.0806	0.0884	0.0884	0.0872	0.0885	0.0899	0.1024	0.103	0.1023	0.0945	0.0973	0.0982	0.0218	0.0146	0.0139	0.0073	0.0088	0.0083
0.0999444	0.0804	0.0879	0.0878	0.0865	0.0865	0.0889	0.1019	0.1031	0.1016	0.0977	0.0964	0.097	0.0215	0.0152	0.0138	0.0112	0.0099	0.0081
0.199944	0.0807	0.0882	0.0879	0.0864	0.0861	0.0898	0.1026	0.1038	0.1016	0.0974	0.0963	0.0977	0.0219	0.0156	0.0137	0.011	0.0102	0.0079
0.299944	0.0809	0.088	0.088	0.0874	0.0869	0.0882	0.1027	0.1037	0.1019	0.0973	0.0971	0.0977	0.0218	0.0157	0.0139	0.0099	0.0102	0.0095
0.399972	0.0809	0.0878	0.0878	0.088	0.0884	0.0904	0.1034	0.1041	0.1028	0.098	0.0972	0.0985	0.0225	0.0163	0.015	0.01	0.0088	0.0081
0.499972	0.0807	0.0877	0.0879	0.0878	0.0879	0.0897	0.1045	0.105	0.1036	0.0985	0.0983	0.0992	0.0238	0.0173	0.0157	0.0107	0.0104	0.0095
0.6	0.0809	0.0879	0.0879	0.0866	0.0874	0.0879	0.1058	0.1062	0.1042	0.0999	0.0987	0.0996	0.0249	0.0183	0.0163	0.0133	0.0113	0.0117
0.7	0.0816	0.088	0.088	0.0868	0.0875	0.0898	0.1071	0.1073	0.1058	0.1008	0.1001	0.1032	0.0255	0.0193	0.0178	0.014	0.0126	0.0134
0.8	0.0816	0.0876	0.0881	0.0881	0.0874	0.0894	0.1077	0.1082	0.1066	0.1012	0.1008	0.1022	0.0261	0.0206	0.0185	0.0131	0.0134	0.0128
0.900028	0.0814	0.0881	0.0879	0.0871	0.0866	0.0887	0.1091	0.1093	0.108	0.1034	0.1028	0.1038	0.0277	0.0212	0.0201	0.0163	0.0162	0.0151
1.00003	0.0808	0.0878	0.0877	0.0866	0.0871	0.088	0.1116	0.1113	0.1094	0.1045	0.1047	0.1062	0.0308	0.0235	0.0217	0.0179	0.0176	0.0182
1.10006	0.081	0.0879	0.0878	0.0887	0.0882	0.0885	0.114	0.1142	0.1116	0.107	0.1072	0.1087	0.033	0.0263	0.0238	0.0183	0.019	0.0202
1.20006	0.081	0.088	0.0879	0.0867	0.0863	0.0881	0.1181	0.117	0.1143	0.1101	0.1106	0.1116	0.0371	0.029	0.0264	0.0234	0.0243	0.0235
1.30006	0.0808	0.088	0.088	0.0878	0.0875	0.0885	0.1218	0.1214	0.1179	0.113	0.1151	0.1156	0.041	0.0334	0.0299	0.0252	0.0276	0.0271
1.40008	0.081	0.0881	0.0879	0.0876	0.0872	0.0881	0.1259	0.1263	0.1226	0.1182	0.1194	0.1203	0.0449	0.0382	0.0347	0.0306	0.0322	0.0322
1.50008	0.0807	0.0883	0.0879	0.0869	0.088	0.0892	0.1327	0.1327	0.127	0.1231	0.1249	0.1268	0.052	0.0444	0.0391	0.0362	0.0369	0.0376
1.60011	0.0816	0.0885	0.0883	0.0868	0.0861	0.0884	0.1401	0.1405	0.135	0.1293	0.133	0.1329	0.0585	0.052	0.0467	0.0425	0.0469	0.0445
1.70011	0.0806	0.0884	0.0879	0.0868	0.0866	0.0885	0.1504	0.149	0.1416	0.1371	0.142	0.1435	0.0698	0.0606	0.0537	0.0503	0.0554	0.055
1.80014	0.0811	0.0896	0.0881	0.0873	0.0859	0.0883	0.1576	0.1602	0.1526	0.1463	0.1535	0.1522	0.0765	0.0706	0.0645	0.059	0.0676	0.0639
1.90014	0.0809	0.0898	0.0878	0.0879	0.0873	0.0883	0.1705	0.171	0.1628	0.1568	0.1662	0.164	0.0896	0.0812	0.075	0.0689	0.0789	0.0757
2.00014	0.0812	0.0908	0.0876	0.0879	0.0884	0.0891	0.1818	0.1831	0.1724	0.1688	0.1826	0.1787	0.1006	0.0923	0.0848	0.0809	0.0942	0.0896
2.10017	0.0813	0.0908	0.0879	0.086	0.0856	0.0871	0.1947	0.1969	0.1892	0.1851	0.2019	0.1943	0.1134	0.1061	0.1013	0.0991	0.1163	0.1072
2.20017	0.0806	0.0907	0.0878	0.0878	0.0882	0.0888	0.21	0.2131	0.2024	0.2034	0.2222	0.2103	0.1294	0.1224	0.1146	0.1156	0.134	0.1215
2.30019	0.0814	0.0914	0.0879	0.0865	0.0864	0.0875	0.2287	0.2309	0.2203	0.2223	0.2427	0.2305	0.1473	0.1395	0.1324	0.1358	0.1563	0.143
2.40019	0.0809	0.0914	0.0877	0.0869	0.087	0.0887	0.2451	0.2481	0.2393	0.2454	0.2667	0.2505	0.1642	0.1567	0.1516	0.1585	0.1797	0.1618
2.50019	0.0813	0.0914	0.0878	0.0866	0.0859	0.0881	0.2657	0.2698	0.2582	0.2665	0.2939	0.2701	0.1844	0.1784	0.1704	0.1799	0.208	0.182
2.60022	0.0807	0.0911	0.0878	0.0847	0.0852	0.0868	0.2851	0.2907	0.281	0.2979	0.3136	0.2912	0.2044	0.1996	0.1932	0.2132	0.2284	0.2044
2.70022	0.0812	0.0907	0.0878	0.087	0.0875	0.089	0.3048	0.3115	0.2994	0.3185	0.3448	0.3138	0.2236	0.2208	0.2116	0.2315	0.2573	0.2248
2.80025	0.0808	0.0901	0.0877	0.0865	0.0877	0.0882	0.3244	0.331	0.3208	0.3399	0.3695	0.3369	0.2436	0.2409	0.2331	0.2534	0.2818	0.2487
2.90025	0.0817	0.0903	0.0878	0.0849	0.0853	0.0878	0.3465	0.3541	0.3457	0.3654	0.395	0.3638	0.2648	0.2638	0.2579	0.2805	0.3097	0.276
3.00025	0.0809	0.0896	0.0878	0.0853	0.0866	0.0871	0.3686	0.3764	0.3665	0.3861	0.4161	0.386	0.2877	0.2868	0.2787	0.3008	0.3295	0.2989
3.10028	0.0803	0.0895	0.0878	0.0873	0.0864	0.0874	0.3931	0.4018	0.3921	0.4038	0.4396	0.4078	0.3128	0.3123	0.3043	0.3165	0.3532	0.3204
3.20028	0.0808	0.0893	0.0878	0.0863	0.0861	0.0867	0.4192	0.4286	0.421	0.4216	0.4611	0.4281	0.3384	0.3393	0.3332	0.3353	0.375	0.3414
3.30031	0.0809	0.0892	0.0881	0.0871	0.0882	0.0884	0.4414	0.4535	0.4439	0.4373	0.4864	0.4505	0.3605	0.3643	0.3558	0.3502	0.3982	0.3621
3.40031	0.0817	0.0889	0.0879	0.0872	0.087	0.088	0.4671	0.4783	0.469	0.4535	0.5094	0.4747	0.3854	0.3894	0.3811	0.3663	0.4224	0.3867
3.50031	0.0813	0.0886	0.0878	0.0876	0.0878	0.0876	0.494	0.5046	0.4971	0.4662	0.5276	0.4943	0.4127	0.416	0.4093	0.3786	0.4398	0.4067
3.60033	0.0816	0.0886	0.0877	0.0879	0.0869	0.0886	0.5164	0.5286	0.5262	0.4783	0.5463	0.5142	0.4348	0.44	0.4385	0.3904	0.4594	0.4256
3.70033	0.0818	0.0886	0.0876	0.0853	0.0861	0.0878	0.5402	0.5533	0.5503	0.4891	0.5644	0.5309	0.4584	0.4647	0.4627	0.4038	0.4783	0.4431
3.80033	0.0816	0.0886	0.0877	0.0876	0.0869	0.0876	0.5575	0.5709	0.573	0.5003	0.5776	0.5468	0.4759	0.4823	0.4853	0.4127	0.4907	0.4592
3.90036	0.0815	0.0885	0.0876	0.0876	0.0871	0.0881	0.5771	0.5893	0.5892	0.51	0.5925	0.5604	0.4956	0.5008	0.5016	0.4224	0.5054	0.4723
4.00036	0.0811	0.0885	0.0879	0.0868	0.0869	0.0885	0.5931	0.6069	0.6074	0.5166	0.6002	0.5791	0.512	0.5184	0.5195	0.4298	0.5133	0.4906
4.10039	0.0812	0.0887	0.088	0.0873	0.0882	0.0889	0.6124	0.6227	0.6305	0.5289	0.6171	0.5891	0.5312	0.534	0.5425	0.4416	0.5289	0.5002
4.20039	0.0817	0.0885	0.0877	0.0856	0.0877	0.0871	0.6315	0.6397	0.6484	0.5416	0.6254	0.6019	0.5498	0.5512	0.5607	0.456	0.5377	0.5148
4.30042	0.0818	0.0887	0.0878	0.0865	0.0864	0.0886	0.6434	0.6526	0.6714	0.5518	0.6329	0.6117	0.5616	0.5639	0.5836	0.4653	0.5465	0.5231
4.40042	0.0811	0.0886	0.0877	0.0849	0.0855	0.0865	0.6634	0.6661	0.6915	0.5592	0.6438	0.6239	0.5823	0.5775	0.6038	0.4743	0.5583	0.5374
4.50042	0.0813	0.0888	0.0879	0.0861	0.0862	0.0874	0.6781	0.6795	0.7057	0.5666	0.6516	0.6305	0.5968	0.5907	0.6178	0.4805	0.5654	0.5431
4.60044	0.0811	0.0887	0.0877	0.0868	0.088	0.0883	0.6912	0.6914	0.7207	0.5844	0.6561	0.6433	0.6101	0.6027	0.633	0.4976	0.5681	0.555
4.70044	0.0817	0.0888	0.0879	0.0867	0.0876	0.0883	0.7066	0.7038	0.7366	0.5852	0.6691	0.65	0.6249	0.615	0.6487	0.4985	0.5815	0.5617
4.80047	0.0819	0.0889	0.088	0.0868	0.087	0.0885	0.7177	0.7156	0.7475	0.5933	0.6754	0.6673	0.6358	0.6267	0.6595	0.5065	0.5884	0.5788
4.90047	0.0816	0.0889	0.0878	0.0862	0.0865	0.0877	0.7274	0.729	0.7598	0.6013	0.6829	0.6769	0.6458	0.6401	0.672	0.5151	0.5964	0.5892
5.00047	0.0818	0.0887	0.0878	0.0873	0.0869	0.0882	0.7405	0.742	0.7733	0.6125	0.6864	0.6836	0.6587	0.6533	0.6855	0.5252	0.5995	0.5954
5.1005	0.0817	0.0889	0.0879	0.0864	0.0874	0.089	0.7495	0.7493	0.7794	0.6133	0.6913	0.6881	0.6678	0.6604	0.6915	0.5269	0.6039	0.5991
5.2005	0.082	0.089	0.0879	0.0874	0.0885	0.089	0.7602	0.7608	0.7889	0.6226	0.7007	0.6991	0.6782	0.6718	0.701	0.5352	0.6122	0.6101
5.30053	0.0816	0.0886	0.0878	0.0853	0.0857	0.0879	0.7681	0.7689	0.801	0.6278	0.7091	0.7054	0.6865	0.6803	0.7132	0.5425	0.6234	0.6175
5.40053	0.0819	0.0887	0.0879	0.0869	0.087	0.0889	0.7768	0.778	0.8074	0.6331	0.7128	0.713	0.6949	0.6893	0.7195	0.5462	0.6258	0.6241
5.50053	0.0814	0.0886	0.0879	0.0868	0.0879	0.088	0.7862	0.7873	0.8212	0.6412	0.7186	0.7177	0.7048	0.6987	0.7333	0.5544	0.6307	0.6297
5.60056	0.0815	0.0887	0.0879	0.0861	0.0863	0.0863	0.7915	0.7952	0.8284	0.6462	0.7271	0.7259	0.71	0.7065	0.7405	0.5601	0.6408	0.6396
5.70056	0.0817	0.0887	0.088	0.0864	0.0865	0.0893	0.8023	0.8035	0.836	0.6528	0.734	0.7329	0.7206	0.7148	0.748	0.5664	0.6475	0.6436
5.80058	0.0817	0.0886	0.0879	0.087	0.0883	0.0877	0.8081	0.8109	0.846	0.6589	0.7383	0.7392	0.7264	0.7223	0.7581	0.5719	0.65	0.6515
5.90058	0.0814	0.0884	0.0876	0.0876	0.0885	0.0897	0.8173	0.8189	0.8523	0.6612	0.745	0.7479	0.7359	0.7305	0.7647	0.5736	0.6565	0.6582
6.00061	0.0814	0.0886	0.0878	0.0857	0.0864	0.0882	0.8215	0.8243	0.8618	0.6741	0.7465	0.7521	0.7401	0.7357	0.774	0.5884	0.6601	0.6639
6.10061	0.0815	0.0884	0.0877	0.0863	0.0874	0.0886	0.8287	0.8325	0.8691	0.6764	0.7505	0.7592	0.7472	0.7441	0.7814	0.5901	0.6631	0.6706
6.20061	0.0819	0.0887	0.0879	0.0865	0.0876	0.0891	0.8329	0.8361	0.8751	0.6791	0.7596	0.7609	0.751	0.7474	0.7872	0.5926	0.672	0.6718
6.30064	0.0814	0.0886	0.0877	0.0869	0.0874	0.0874	0.8415	0.8445	0.8829	0.6839	0.7622	0.7691	0.7601	0.7559	0.7952	0.597	0.6748	0.6817
6.40064	0.0809	0.0887	0.0878	0.0875	0.0876	0.0879	0.8499	0.8499	0.8901	0.6814	0.7649	0.7858	0.769	0.7612	0.8023	0.5939	0.6773	0.6979
6.50064	0.0815	0.0886	0.0878	0.0876	0.0879	0.0889	0.8544	0.856	0.8983	0.6978	0.7711	0.7965	0.7729	0.7674	0.8105	0.6102	0.6832	0.7076
6.60067	0.0814	0.0889	0.0879	0.0864	0.087	0.0886	0.8607	0.8631	0.9026	0.6978	0.7752	0.7884	0.7793	0.7742	0.8147	0.6114	0.6882	0.6998
6.70067	0.081	0.0891	0.0879	0.0873	0.0865	0.0877	0.8677	0.8699	0.9103	0.7002	0.7831	0.7912	0.7867	0.7808	0.8224	0.6129	0.6966	0.7035
6.80069	0.0816	0.0889	0.0876	0.0878	0.0868	0.0887	0.8699	0.8722	0.9116	0.7041	0.7882	0.7897	0.7883	0.7833	0.824	0.6163	0.7014	0.701
6.90069	0.0813	0.089	0.0878	0.0852	0.0853	0.0871	0.8769	0.8776	0.9201	0.7132	0.7842	0.8006	0.7956	0.7886	0.8323	0.628	0.6989	0.7135
7.00069	0.081	0.0891	0.0877	0.0867	0.0862	0.0875	0.8755	0.879	0.919	0.7143	0.7857	0.8021	0.7945	0.7899	0.8313	0.6276	0.6995	0.7146
7.10072	0.081	0.0889	0.0879	0.0859	0.0853	0.0885	0.8836	0.8849	0.9255	0.7184	0.7884	0.8092	0.8026	0.796	0.8376	0.6325	0.7031	0.7207
7.20072	0.0818	0.0888	0.0879	0.0867	0.0872	0.0895	0.8882	0.8899	0.9326	0.7219	0.793	0.8182	0.8064	0.8011	0.8447	0.6352	0.7058	0.7287
7.30075	0.0816	0.0888	0.0877	0.086	0.0855	0.0867	0.8899	0.8924	0.9337	0.7235	0.7937	0.8178	0.8083	0.8036	0.846	0.6375	0.7082	0.7311
7.40075	0.0811	0.0889	0.0878	0.0884	0.0876	0.0886	0.8931	0.8946	0.9366	0.7276	0.7972	0.8183	0.812	0.8057	0.8488	0.6392	0.7096	0.7297
7.50078	0.0817	0.0889	0.0878	0.0867	0.0857	0.0878	0.8954	0.8984	0.9412	0.7321	0.7992	0.8223	0.8137	0.8095	0.8534	0.6454	0.7135	0.7345
7.60078	0.0815	0.0891	0.0878	0.0859	0.0858	0.0869	0.8989	0.9005	0.9425	0.7334	0.8005	0.8249	0.8174	0.8114	0.8547	0.6475	0.7147	0.738
7.70078	0.0818	0.089	0.0878	0.087	0.0866	0.088	0.9055	0.904	0.9474	0.7391	0.8031	0.8273	0.8237	0.815	0.8596	0.6521	0.7165	0.7393
7.80081	0.0813	0.0889	0.0876	0.0872	0.0863	0.0874	0.9068	0.9085	0.9544	0.7426	0.8067	0.8315	0.8255	0.8196	0.8668	0.6554	0.7204	0.7441
7.90081	0.0816	0.089	0.088	0.0868	0.0875	0.0897	0.9109	0.9134	0.9613	0.7487	0.8114	0.8385	0.8293	0.8244	0.8733	0.6619	0.7239	0.7488
8.00083	0.0814	0.0891	0.0878	0.0865	0.086	0.0878	0.9126	0.9153	0.9609	0.7504	0.8126	0.8398	0.8312	0.8262	0.8731	0.6639	0.7266	0.752
8.10083	0.0811	0.0888	0.0877	0.0862	0.087	0.0884	0.9179	0.918	0.963	0.7535	0.8136	0.84	0.8368	0.8292	0.8753	0.6673	0.7266	0.7516
8.20083	0.0811	0.089	0.088	0.0877	0.0881	0.0896	0.9174	0.9209	0.9673	0.7553	0.8144	0.8428	0.8363	0.8319	0.8793	0.6676	0.7263	0.7532
8.30086	0.0815	0.0888	0.0877	0.0857	0.0858	0.088	0.9232	0.9251	0.9726	0.7585	0.8173	0.8515	0.8417	0.8363	0.8849	0.6728	0.7315	0.7635
8.40086	0.0809	0.0887	0.0877	0.0864	0.0881	0.0882	0.9233	0.9256	0.9722	0.7606	0.8187	0.8495	0.8424	0.8369	0.8845	0.6742	0.7306	0.7613
8.50089	0.0813	0.0888	0.0877	0.0869	0.0876	0.0879	0.9254	0.9286	0.9755	0.7637	0.8194	0.852	0.8441	0.8398	0.8878	0.6768	0.7318	0.7641
8.60089	0.0818	0.0891	0.088	0.0873	0.0874	0.0885	0.9287	0.9325	0.9813	0.7685	0.822	0.8561	0.8469	0.8434	0.8933	0.6812	0.7346	0.7676
8.70089	0.0812	0.0887	0.0877	0.0861	0.0859	0.0877	0.9305	0.9336	0.9803	0.7691	0.8227	0.8576	0.8493	0.8449	0.8926	0.683	0.7368	0.7699
8.80092	0.081	0.0888	0.0878	0.0867	0.087	0.0889	0.9355	0.9382	0.9868	0.7717	0.8254	0.8594	0.8545	0.8494	0.899	0.685	0.7384	0.7705
8.90092	0.0811	0.0888	0.0877	0.0871	0.0868	0.0877	0.9363	0.9393	0.9905	0.7737	0.829	0.8626	0.8552	0.8505	0.9028	0.6866	0.7422	0.7749
9.00094	0.0815	0.0888	0.0877	0.088	0.0877	0.0883	0.9397	0.9426	0.9924	0.7766	0.8295	0.8649	0.8582	0.8538	0.9047	0.6886	0.7418	0.7766
9.10094	0.0811	0.0888	0.0878	0.0875	0.087	0.0889	0.9416	0.9442	0.9939	0.7771	0.8294	0.8655	0.8605	0.8554	0.9061	0.6896	0.7424	0.7766
9.20094	0.0817	0.0888	0.0878	0.0872	0.0865	0.089	0.9429	0.9454	0.9951	0.7788	0.8318	0.8684	0.8612	0.8566	0.9073	0.6916	0.7453	0.7794
9.30097	0.0812	0.0888	0.0877	0.0862	0.087	0.0871	0.9445	0.9494	0.999	0.7807	0.833	0.8701	0.8633	0.8606	0.9113	0.6945	0.746	0.783
9.40097	0.0815	0.0888	0.0879	0.0863	0.0879	0.088	0.9475	0.9512	1.0054	0.7841	0.8351	0.8727	0.866	0.8624	0.9175	0.6978	0.7472	0.7847
9.501	0.0809	0.089	0.0878	0.0871	0.088	0.0894	0.9516	0.9537	1.0059	0.7865	0.8389	0.875	0.8707	0.8647	0.9181	0.6994	0.7509	0.7856
9.601	0.0811	0.089	0.0879	0.0871	0.0876	0.0879	0.9517	0.9564	1.0111	0.7879	0.8369	0.8771	0.8706	0.8674	0.9232	0.7008	0.7493	0.7892
9.701	0.0811	0.0888	0.0876	0.0873	0.088	0.0877	0.9557	0.9583	1.0127	0.7891	0.8394	0.8792	0.8746	0.8695	0.9251	0.7018	0.7514	0.7915
9.80103	0.0811	0.0888	0.0878	0.0866	0.0863	0.0877	0.957	0.9614	1.0157	0.789	0.84	0.8815	0.8759	0.8726	0.9279	0.7024	0.7537	0.7938
9.90103	0.0817	0.0888	0.0878	0.086	0.0876	0.0876	0.9584	0.9637	1.0183	0.7934	0.8435	0.8851	0.8767	0.8749	0.9305	0.7074	0.7559	0.7975
10.0011	0.0812	0.089	0.0878	0.0875	0.0868	0.0881	0.9588	0.9647	1.0185	0.7929	0.8457	0.886	0.8776	0.8757	0.9307	0.7054	0.7589	0.7979
10.1011	0.0815	0.0891	0.0877	0.0815	0.0891	0.0877	0.9663	0.9687	1.027	0.7964	0.8571	0.8914	0.8848	0.8796	0.9393	0.7149	0.768	0.8037
10.2011	0.0811	0.0893	0.088	0.0811	0.0893	0.088	0.9668	0.9712	1.0284	0.7982	0.8506	0.8925	0.8857	0.8819	0.9404	0.7171	0.7613	0.8045
10.3011	0.081	0.0891	0.0882	0.081	0.0891	0.0882	0.9687	0.9736	1.0323	0.799	0.8506	0.8953	0.8877	0.8845	0.9441	0.718	0.7615	0.8071
10.4011	0.0814	0.0895	0.0878	0.0814	0.0895	0.0878	0.9669	0.9736	1.0323	0.8007	0.8517	0.8951	0.8855	0.8841	0.9445	0.7193	0.7622	0.8073
10.5011	0.0808	0.0892	0.0877	0.0808	0.0892	0.0877	0.9686	0.9754	1.032	0.8032	0.8527	0.8944	0.8878	0.8862	0.9443	0.7224	0.7635	0.8067
10.6011	0.0814	0.0895	0.088	0.0814	0.0895	0.088	0.9752	0.9793	1.0399	0.807	0.8571	0.9004	0.8938	0.8898	0.9519	0.7256	0.7676	0.8124
10.7011	0.0813	0.0893	0.088	0.0813	0.0893	0.088	0.9733	0.981	1.0405	0.8074	0.8579	0.8984	0.892	0.8917	0.9525	0.7261	0.7686	0.8104
10.8011	0.0815	0.0894	0.0879	0.0815	0.0894	0.0879	0.9782	0.9838	1.043	0.8092	0.862	0.9044	0.8967	0.8944	0.9551	0.7277	0.7726	0.8165
10.9011	0.081	0.0893	0.0879	0.081	0.0893	0.0879	0.9773	0.9845	1.046	0.8104	0.8845	0.9031	0.8963	0.8952	0.9581	0.7294	0.7952	0.8152
11.0011	0.081	0.0893	0.0878	0.081	0.0893	0.0878	0.9785	0.9875	1.0485	0.8121	0.8946	0.9053	0.8975	0.8982	0.9607	0.7311	0.8053	0.8175
11.1012	0.0813	0.0893	0.0878	0.0813	0.0893	0.0878	0.9832	0.9897	1.0508	0.8138	0.8666	0.9078	0.9019	0.9004	0.963	0.7325	0.7773	0.82
11.2012	0.0812	0.0894	0.0879	0.0812	0.0894	0.0879	0.9845	0.991	1.0539	0.8164	0.8861	0.9114	0.9033	0.9016	0.966	0.7352	0.7967	0.8235
11.3012	0.0811	0.0894	0.0879	0.0811	0.0894	0.0879	0.9838	0.9926	1.054	0.8178	0.8711	0.9082	0.9027	0.9032	0.9661	0.7367	0.7817	0.8203
11.4012	0.0816	0.0893	0.0879	0.0816	0.0893	0.0879	0.9881	0.9962	1.0594	0.8186	0.8723	0.9135	0.9065	0.9069	0.9715	0.737	0.783	0.8256
11.5012	0.0812	0.0892	0.0878	0.0812	0.0892	0.0878	0.9913	0.9984	1.0653	0.8229	0.8704	0.9141	0.9101	0.9092	0.9775	0.7417	0.7812	0.8263
11.6012	0.0812	0.0892	0.0878	0.0812	0.0892	0.0878	0.9897	0.999	1.0614	0.8238	0.8762	0.9108	0.9085	0.9098	0.9736	0.7426	0.787	0.823
11.7012	0.0813	0.0895	0.088	0.0813	0.0895	0.088	0.9947	1.0042	1.0687	0.8272	0.8748	0.9228	0.9134	0.9147	0.9807	0.7459	0.7853	0.8348
11.8013	0.081	0.0892	0.0879	0.081	0.0892	0.0879	0.9934	1.0032	1.0661	0.8313	0.8763	0.9189	0.9124	0.914	0.9782	0.7503	0.7871	0.831
11.9013	0.081	0.0893	0.0879	0.081	0.0893	0.0879	0.995	1.0056	1.0683	0.8339	0.8865	0.9134	0.914	0.9163	0.9804	0.7529	0.7972	0.8255
12.0013	0.0812	0.0892	0.088	0.0812	0.0892	0.088	0.997	1.0079	1.0691	0.8229	0.8798	0.9154	0.9158	0.9187	0.9811	0.7417	0.7906	0.8274
12.1013	0.0813	0.0891	0.0879	0.0813	0.0891	0.0879	0.9993	1.0114	1.0714	0.8239	0.8844	0.9157	0.918	0.9223	0.9835	0.7426	0.7953	0.8278
12.2013	0.0817	0.0894	0.0878	0.0817	0.0894	0.0878	1.0031	1.0153	1.0807	0.8304	0.8941	0.9201	0.9214	0.9259	0.9929	0.7487	0.8047	0.8323
12.3013	0.0818	0.0892	0.0879	0.0818	0.0892	0.0879	1.0047	1.0169	1.0797	0.8313	0.8899	0.9282	0.9229	0.9277	0.9918	0.7495	0.8007	0.8403
12.4013	0.0813	0.0892	0.0878	0.0813	0.0892	0.0878	1.0054	1.0184	1.0793	0.8356	0.8935	0.924	0.9241	0.9292	0.9915	0.7543	0.8043	0.8362
12.5013	0.0813	0.0891	0.0879	0.0813	0.0891	0.0879	1.0091	1.02	1.0826	0.8382	0.8954	0.9224	0.9278	0.9309	0.9947	0.7569	0.8063	0.8345
12.6013	0.0811	0.0891	0.0878	0.0811	0.0891	0.0878	1.0119	1.0225	1.0846	0.8412	0.8914	0.9221	0.9308	0.9334	0.9968	0.7601	0.8023	0.8343
12.7014	0.0807	0.0893	0.0879	0.0807	0.0893	0.0879	1.0106	1.0247	1.0861	0.8387	0.8932	0.9258	0.9299	0.9354	0.9982	0.758	0.8039	0.8379
12.8014	0.081	0.0892	0.0881	0.081	0.0892	0.0881	1.016	1.0283	1.0932	0.8374	0.8974	0.9329	0.935	0.9391	1.0051	0.7564	0.8082	0.8448
12.9014	0.0812	0.0891	0.0879	0.0812	0.0891	0.0879	1.0137	1.0279	1.0891	0.8409	0.8964	0.9334	0.9325	0.9388	1.0012	0.7597	0.8073	0.8455
13.0014	0.0812	0.0891	0.0878	0.0812	0.0891	0.0878	1.018	1.0299	1.0915	0.8429	0.8943	0.928	0.9368	0.9408	1.0037	0.7617	0.8052	0.8402
13.1014	0.081	0.0893	0.088	0.081	0.0893	0.088	1.0175	1.0318	1.0924	0.8453	0.9009	0.9343	0.9365	0.9425	1.0044	0.7643	0.8116	0.8463
13.2014	0.081	0.0892	0.0878	0.081	0.0892	0.0878	1.0208	1.0343	1.0954	0.8459	0.8997	0.9301	0.9398	0.9451	1.0076	0.7649	0.8105	0.8423
13.3014	0.0813	0.0893	0.0881	0.0813	0.0893	0.0881	1.0199	1.0338	1.0955	0.8462	0.9022	0.9273	0.9386	0.9445	1.0074	0.7649	0.8129	0.8392
13.4014	0.0808	0.0893	0.0877	0.0808	0.0893	0.0877	1.023	1.036	1.0983	0.8446	0.902	0.9339	0.9422	0.9467	1.0106	0.7638	0.8127	0.8462
13.5014	0.081	0.0891	0.0879	0.081	0.0891	0.0879	1.0249	1.0393	1.099	0.8445	0.9019	0.9369	0.9439	0.9502	1.0111	0.7635	0.8128	0.849
13.6014	0.0813	0.089	0.088	0.0813	0.089	0.088	1.0258	1.0402	1.1012	0.8488	0.9055	0.9382	0.9445	0.9512	1.0132	0.7675	0.8165	0.8502
13.7014	0.0808	0.089	0.0877	0.0808	0.089	0.0877	1.0308	1.0434	1.1059	0.8551	0.9024	0.9501	0.95	0.9544	1.0182	0.7743	0.8134	0.8624
13.8015	0.0808	0.089	0.088	0.0808	0.089	0.088	1.0283	1.0434	1.1041	0.8499	0.904	0.9386	0.9475	0.9544	1.0161	0.7691	0.815	0.8506
13.9015	0.0809	0.0893	0.088	0.0809	0.0893	0.088	1.0294	1.0449	1.1049	0.849	0.9048	0.9426	0.9485	0.9556	1.0169	0.7681	0.8155	0.8546
14.0015	0.081	0.0892	0.0878	0.081	0.0892	0.0878	1.0315	1.0471	1.1056	0.8498	0.9037	0.9416	0.9505	0.9579	1.0178	0.7688	0.8145	0.8538

## Sheet: _flu_mscarlet
time (h)	blank1	blank2	blank3	blank4	blank5	blank6	rpsB1	rpsB2	rpsB3	rpsB4	rpsB5	rpsB6	rpsB-B	rpsB-B	rpsB-B	rpsB-B	rpsB-B	rpsB-B
0	35	27	43	31	37	46	49	50	51	52	45	53	14	23	8	21	8	7
0.0999444	38	31	41	35	39	40	49	50	48	52	45	50	11	19	7	17	6	10
0.199944	32	26	36	30	43	45	55	49	51	58	44	53	23	23	15	28	1	8
0.299944	42	23	36	26	37	44	55	65	51	58	60	53	13	42	15	32	23	9
0.399972	33	31	42	41	39	40	50	50	51	53	45	53	17	19	9	12	6	13
0.499972	39	31	43	39	37	43	54	50	48	57	45	50	15	19	5	18	8	7
0.6	34	35	39	35	41	33	55	49	51	58	44	53	21	14	12	23	3	20
0.7	38	19	33	32	37	44	55	65	51	58	60	53	17	46	18	26	23	9
0.8	29	31	29	38	41	37	49	50	51	52	45	53	20	19	22	14	4	16
0.900028	34	26	32	40	30	37	54	53	48	57	48	50	20	27	16	17	18	13
1.00003	39	30	30	37	35	34	55	49	51	58	44	53	16	19	21	21	9	19
1.10006	33	28	34	30	37	40	55	65	51	58	60	53	22	37	17	28	23	13
1.20006	35	28	34	39	37	44	54	57	57	57	52	59	19	29	23	18	15	15
1.30006	38	27	40	40	40	33	66	71	63	69	66	65	28	44	23	29	26	32
1.40008	31	23	38	44	39	38	77	74	81	80	69	83	46	51	43	36	30	45
1.50008	29	37	34	36	42	35	68	72	76	71	67	78	39	35	42	35	25	43
1.60011	37	30	36	32	35	41	74	86	80	77	81	82	37	56	44	45	46	41
1.70011	30	22	33	40	36	32	84	89	76	87	84	78	54	67	43	47	48	46
1.80014	35	29	31	35	50	39	77	94	95	80	89	97	42	65	64	45	39	58
1.90014	35	34	41	37	40	33	99	115	108	102	110	110	64	81	67	65	70	77
2.00014	31	31	42	31	30	39	126	120	120	129	115	122	95	89	78	98	85	83
2.10017	30	22	33	35	39	43	119	134	131	122	129	133	89	112	98	87	90	90
2.20017	35	23	39	35	41	37	139	151	151	142	146	153	104	128	112	107	105	116
2.30019	28	35	36	32	37	37	166	174	170	169	169	172	138	139	134	137	132	135
2.40019	32	31	34	30	45	35	179	200	190	182	195	192	147	169	156	152	150	157
2.50019	31	30	31	36	27	41	200	212	212	203	207	214	169	182	181	167	180	173
2.60022	31	25	36	40	41	36	237	241	243	240	236	245	206	216	207	200	195	209
2.70022	30	27	32	45	38	37	254	260	262	257	255	264	224	233	230	212	217	227
2.80025	28	22	33	35	40	35	272	277	283	275	272	285	244	255	250	240	232	250
2.90025	32	36	27	41	41	33	311	303	310	314	298	312	279	267	283	273	257	279
3.00025	35	23	34	39	36	33	343	351	343	346	346	345	308	328	309	307	310	312
3.10028	35	25	29	33	41	38	376	382	373	379	377	375	341	357	344	346	336	337
3.20028	34	26	29	39	41	42	443	446	423	446	441	425	409	420	394	407	400	383
3.30031	26	20	33	35	37	45	442	501	440	445	496	442	416	481	407	410	459	397
3.40031	36	24	40	37	36	44	500	591	500	503	586	502	464	567	460	466	550	458
3.50031	34	33	35	37	39	35	549	594	542	552	589	544	515	561	507	515	550	509
3.60033	34	20	33	33	40	28	599	581	610	602	576	612	565	561	577	569	536	584
3.70033	36	29	31	38	41	36	657	662	636	660	657	638	621	633	605	622	616	602
3.80033	38	28	33	36	40	37	697	674	685	700	669	687	659	646	652	664	629	650
3.90036	41	28	29	42	32	39	746	705	711	749	700	713	705	677	682	707	668	674
4.00036	36	26	31	35	38	29	788	758	740	791	753	742	752	732	709	756	715	713
4.10039	36	30	29	34	40	40	817	809	811	820	804	813	781	779	782	786	764	773
4.20039	30	27	35	33	33	34	911	861	829	914	856	831	881	834	794	881	823	797
4.30042	33	30	34	40	40	34	920	920	853	923	915	855	887	890	819	883	875	821
4.40042	34	27	34	42	39	33	951	948	896	954	943	898	917	921	862	912	904	865
4.50042	32	26	37	38	36	38	1006	959	935	1004	968	1081	974	933	898	966	932	1043
4.60044	29	26	33	36	36	34	1038	1009	1023	1073	969	1120	1009	983	990	1037	933	1086
4.70044	32	31	32	41	38	37	1082	1063	1059	1113	1044	1158	1050	1032	1027	1072	1006	1121
4.80047	33	26	31	40	37	35	1165	1102	1089	1167	1076	1208	1132	1076	1058	1127	1039	1173
4.90047	35	34	34	33	33	31	1171	1199	1117	1229	1177	1249	1136	1165	1083	1196	1144	1218
5.00047	32	29	34	33	29	30	1228	1230	1194	1265	1227	1326	1196	1201	1160	1232	1198	1296
5.1005	31	30	33	45	32	34	1302	1237	1208	1324	1276	1387	1271	1207	1175	1279	1244	1353
5.2005	35	27	38	33	30	32	1357	1344	1252	1415	1298	1471	1322	1317	1214	1382	1268	1439
5.30053	31	23	37	33	35	37	1413	1356	1352	1404	1395	1488	1382	1333	1315	1371	1360	1451
5.40053	36	32	31	38	37	44	1429	1412	1378	1476	1455	1561	1393	1380	1347	1438	1418	1517
5.50053	32	32	32	32	36	39	1477	1495	1457	1541	1485	1604	1445	1463	1425	1509	1449	1565
5.60056	38	28	34	34	42	37	1549	1533	1491	1602	1580	1705	1511	1505	1457	1568	1538	1668
5.70056	29	27	32	38	35	45	1599	1621	1550	1657	1607	1793	1570	1594	1518	1619	1572	1748
5.80058	33	21	31	35	36	33	1646	1602	1595	1741	1676	1844	1613	1581	1564	1706	1640	1811
5.90058	37	32	36	37	33	29	1776	1728	1644	1781	1727	1932	1739	1696	1608	1744	1694	1903
6.00061	27	29	31	31	34	42	1786	1732	1720	1894	1742	1956	1759	1703	1689	1863	1708	1914
6.10061	31	26	40	35	26	38	1860	1797	1732	1929	1852	2010	1829	1771	1692	1894	1826	1972
6.20061	30	33	33	30	37	35	1896	1854	1805	2027	1897	2085	1866	1821	1772	1997	1860	2050
6.30064	29	27	40	29	34	37	1928	1866	1843	2057	1986	2133	1899	1839	1803	2028	1952	2096
6.40064	35	19	33	38	28	39	1975	1927	1859	2095	1993	2232	1940	1908	1826	2057	1965	2193
6.50064	37	29	30	34	39	27	2007	1942	1968	2185	2110	2269	1970	1913	1938	2151	2071	2242
6.60067	37	26	31	31	32	40	2048	2004	1973	2266	2164	2333	2011	1978	1942	2235	2132	2293
6.70067	31	26	35	40	35	30	2165	2066	2076	2254	2212	2397	2134	2040	2041	2214	2177	2367
6.80069	35	34	29	33	42	34	2120	2112	2082	2384	2277	2408	2085	2078	2053	2351	2235	2374
6.90069	31	29	34	32	36	33	2255	2208	2115	2438	2264	2518	2224	2179	2081	2406	2228	2485
7.00069	30	25	33	36	41	30	2273	2211	2151	2507	2368	2570	2243	2186	2118	2471	2327	2540
7.10072	28	33	34	29	29	38	2314	2243	2228	2516	2481	2651	2286	2210	2194	2487	2452	2613
7.20072	38	26	28	30	30	34	2325	2316	2253	2598	2476	2691	2287	2290	2225	2568	2446	2657
7.30075	28	21	24	30	33	40	2380	2352	2322	2663	2585	2686	2352	2331	2298	2633	2552	2646
7.40075	31	21	31	36	36	34	2439	2374	2418	2705	2622	2811	2408	2353	2387	2669	2586	2777
7.50078	25	27	36	33	36	35	2447	2389	2443	2795	2683	2851	2422	2362	2407	2762	2647	2816
7.60078	32	22	26	31	37	46	2561	2467	2433	2830	2704	2933	2529	2445	2407	2799	2667	2887
7.70078	33	26	41	35	39	40	2557	2511	2445	2875	2700	2884	2524	2485	2404	2840	2661	2844
7.80081	34	19	31	30	43	45	2628	2595	2507	2981	2734	2953	2594	2576	2476	2951	2691	2908
7.90081	32	18	28	26	37	44	2669	2567	2545	3007	2847	3049	2637	2549	2517	2981	2810	3005
8.00083	34	27	31	41	39	40	2664	2654	2560	3062	2909	3070	2630	2627	2529	3021	2870	3030
8.10083	30	23	32	39	37	43	2672	2578	2630	3047	2930	3155	2642	2555	2598	3008	2893	3112
8.20083	27	28	34	35	41	33	2692	2667	2674	3101	3008	3158	2665	2639	2640	3066	2967	3125
8.30086	21	22	24	32	37	44	2736	2672	2663	3177	3067	3215	2715	2650	2639	3145	3030	3171
8.40086	27	19	33	38	41	37	2778	2717	2737	3186	3138	3291	2751	2698	2704	3148	3097	3254
8.50089	29	24	30	40	30	37	2817	2770	2719	3181	3157	3284	2788	2746	2689	3141	3127	3247
8.60089	25	26	33	37	35	34	2922	2771	2722	3264	3130	3251	2897	2745	2689	3227	3095	3217
8.70089	28	23	33	30	37	40	2844	2822	2786	3335	3145	3385	2816	2799	2753	3305	3108	3345
8.80092	35	28	35	39	37	44	2935	2811	2781	3301	3197	3421	2900	2783	2746	3262	3160	3377
8.90092	31	28	31	40	40	33	2961	2866	2871	3399	3301	3479	2930	2838	2840	3359	3261	3446
9.00094	28	25	33	44	39	38	2894	2905	2826	3386	3351	3445	2866	2880	2793	3342	3312	3407
9.10094	31	23	34	36	42	35	2982	2886	2898	3396	3361	3520	2951	2863	2864	3360	3319	3485
9.20094	36	22	31	32	35	41	3000	2933	2882	3429	3341	3554	2964	2911	2851	3397	3306	3513
9.30097	25	24	33	40	36	32	2997	2914	2948	3458	3415	3528	2972	2890	2915	3418	3379	3496
9.40097	31	25	30	35	50	39	2984	2938	2984	3508	3446	3624	2953	2913	2954	3473	3396	3585
9.501	20	24	28	37	40	33	3026	2982	2957	3501	3373	3578	3006	2958	2929	3464	3333	3545
9.601	29	23	33	31	30	39	3066	3004	2965	3569	3447	3606	3037	2981	2932	3538	3417	3567
9.701	24	27	29	35	39	43	3046	3008	3050	3556	3577	3626	3022	2981	3021	3521	3538	3583
9.80103	31	26	27	35	41	37	3112	3013	3081	3622	3482	3691	3081	2987	3054	3587	3441	3654
9.90103	26	27	35	32	37	37	3161	3061	3073	3599	3546	3637	3135	3034	3038	3567	3509	3600
10.0011	24	28	28	30	45	35	3109	3057	3060	3702	3567	3748	3085	3029	3032	3672	3522	3713
10.1011	23	26	29	36	27	41	3168	3039	3036	3701	3597	3727	3145	3013	3007	3665	3570	3686
10.2011	27	23	31	40	41	36	3105	3127	3094	3770	3627	3772	3078	3104	3063	3730	3586	3736
10.3011	31	23	37	45	38	37	3178	3074	3091	3748	3630	3746	3147	3051	3054	3703	3592	3709
10.4011	23	24	27	35	40	35	3189	3107	3105	3781	3668	3714	3166	3083	3078	3746	3628	3679
10.5011	28	27	26	41	41	33	3206	3147	3132	3741	3685	3740	3178	3120	3106	3700	3644	3707
10.6011	28	24	27	39	36	33	3226	3149	3116	3831	3621	3759	3198	3125	3089	3792	3585	3726
10.7011	28	22	33	33	41	38	3248	3208	3212	3822	3737	3856	3220	3186	3179	3789	3696	3818
10.8011	32	25	25	39	41	42	3265	3147	3213	3869	3787	3839	3233	3122	3188	3830	3746	3797
10.9011	28	18	28	35	37	45	3280	3208	3171	3810	3754	3878	3252	3190	3143	3775	3717	3833
11.0011	24	17	26	37	36	44	3265	3210	3152	3846	3780	3905	3241	3193	3126	3809	3744	3861
11.1012	27	22	25	37	39	35	3259	3201	3162	3872	3729	3902	3232	3179	3137	3835	3690	3867
11.2012	24	26	29	33	40	28	3313	3260	3220	3920	3806	3910	3289	3234	3191	3887	3766	3882
11.3012	27	24	24	38	41	36	3241	3224	3241	3914	3843	3990	3214	3200	3217	3876	3802	3954
11.4012	25	23	30	36	40	37	3252	3256	3193	4015	3907	3932	3227	3233	3163	3979	3867	3895
11.5012	28	23	27	42	32	39	3408	3268	3246	3940	3892	3979	3380	3245	3219	3898	3860	3940
11.6012	24	16	34	35	38	29	3315	3291	3257	4023	3866	4000	3291	3275	3223	3988	3828	3971
11.7012	21	25	28	34	40	40	3345	3321	3311	3967	3853	4075	3324	3296	3283	3933	3813	4035
11.8013	21	22	29	33	33	34	3374	3306	3260	3969	3884	4023	3353	3284	3231	3936	3851	3989
11.9013	27	29	31	40	40	34	3392	3274	3299	4018	4003	4055	3365	3245	3268	3978	3963	4021
12.0013	21	24	26	42	39	33	3408	3355	3234	4101	3887	4139	3387	3331	3208	4059	3848	4106
12.1013	19	20	29	38	36	38	3477	3358	3342	4021	3988	4109	3458	3338	3313	3983	3952	4071
12.2013	24	26	24	36	36	34	3390	3360	3289	4067	3987	4094	3366	3334	3265	4031	3951	4060
12.3013	24	17	33	41	38	37	3411	3407	3329	4049	4052	4100	3387	3390	3296	4008	4014	4063
12.4013	29	18	25	40	37	35	3447	3375	3369	4143	4051	4161	3418	3357	3344	4103	4014	4126
12.5013	19	27	28	33	33	31	3445	3393	3336	4080	4022	4159	3426	3366	3308	4047	3989	4128
12.6013	29	22	29	33	29	30	3457	3411	3393	4151	4101	4208	3428	3389	3364	4118	4072	4178
12.7014	19	17	24	45	32	34	3490	3392	3409	4191	4090	4217	3471	3375	3385	4146	4058	4183
12.8014	28	17	27	33	30	32	3476	3406	3367	4179	4098	4179	3448	3389	3340	4146	4068	4147
12.9014	22	16	30	33	35	37	3502	3414	3408	4177	4175	4280	3480	3398	3378	4144	4140	4243
13.0014	26	25	27	38	37	44	3477	3527	3422	4171	4162	4210	3451	3502	3395	4133	4125	4166
13.1014	21	22	26	32	36	39	3492	3423	3408	4107	4124	4275	3471	3401	3382	4075	4088	4236
13.2014	21	25	24	34	42	37	3565	3416	3400	4139	4159	4241	3544	3391	3376	4105	4117	4204
13.3014	20	19	25	38	35	45	3451	3442	3407	4226	4193	4314	3431	3423	3382	4188	4158	4269
13.4014	20	19	23	35	36	33	3434	3410	3458	4216	4176	4300	3414	3391	3435	4181	4140	4267
13.5014	22	17	27	37	33	29	3500	3422	3502	4153	4188	4261	3478	3405	3475	4116	4155	4232
13.6014	22	20	20	31	34	42	3471	3414	3432	4118	4287	4301	3449	3394	3412	4087	4253	4259
13.7014	18	17	24	35	26	38	3435	3399	3479	4128	4139	4271	3417	3382	3455	4093	4113	4233
13.8015	29	22	27	30	37	35	3464	3347	3448	4237	4182	4254	3435	3325	3421	4207	4145	4219
13.9015	25	21	22	29	34	37	3420	3396	3402	4147	4182	4235	3395	3375	3380	4118	4148	4198
14.0015	19	23	21	38	28	39	3428	3409	3485	4122	4189	4268	3409	3386	3464	4084	4161	4229

## Sheet: mScarlet7OD
time (h)	rpsB1	rpsB2	rpsB3	rpsB4	rpsB5	rpsB6
0	642.202	1575.34	575.539	2876.71	909.091	843.374
0.1	511.628	1250	507.247	1517.86	606.061	1234.57
0.2	1050.23	1474.36	1094.89	2545.45	98.0392	1012.66
0.3	596.33	2675.16	1079.14	3232.32	2254.9	947.368
0.4	755.556	1165.64	600	1200	681.818	1604.94
0.5	630.252	1098.27	318.471	1682.24	769.231	736.842
0.6	843.373	765.027	736.196	1729.32	265.487	1709.4
0.7	666.667	2383.42	1011.24	1857.14	1825.4	671.642
0.8	766.284	922.33	1189.19	1068.7	298.508	1250
0.9	722.022	1273.58	796.02	1042.94	1111.11	860.927
1	519.481	808.511	967.742	1173.18	511.364	1043.96
1.1	666.667	1406.84	714.286	1530.05	1210.53	643.564
1.2	512.129	1000	871.212	769.231	617.284	638.298
1.3	682.927	1317.37	769.231	1150.79	942.029	1180.81
1.4	1024.5	1335.08	1239.19	1176.47	931.677	1397.52
1.5	750	788.288	1074.17	966.851	677.507	1143.62
1.6	632.479	1076.92	942.184	1058.82	980.81	921.348
1.7	773.639	1105.61	800.745	934.394	866.426	836.364
1.8	549.02	920.68	992.248	762.712	576.923	907.668
1.9	714.286	997.537	893.333	943.396	887.199	1017.17
2	944.334	964.247	919.811	1211.37	902.335	926.339
2.1	784.832	1055.61	967.423	877.901	773.861	839.552
2.2	803.709	1045.75	977.312	925.605	783.582	954.732
2.3	936.864	996.416	1012.08	1008.84	844.53	944.056
2.4	895.25	1078.49	1029.02	958.991	834.725	970.334
2.5	916.486	1020.18	1062.21	928.293	865.385	950.549
2.6	1007.83	1082.16	1071.43	938.086	853.765	1022.5
2.7	1001.79	1055.25	1086.96	915.767	843.374	1009.79
2.8	1001.64	1058.53	1072.5	947.119	823.279	1005.23
2.9	1053.63	1012.13	1097.32	973.262	829.835	1010.87
3	1070.56	1143.65	1108.72	1020.61	940.819	1043.83
3.1	1090.15	1143.13	1130.46	1093.21	951.302	1051.81
3.2	1208.63	1237.84	1182.47	1213.84	1066.67	1121.85
3.3	1153.95	1320.34	1143.9	1170.76	1152.69	1096.38
3.4	1203.94	1456.09	1207.03	1272.18	1302.08	1184.38
3.5	1247.88	1348.56	1238.7	1360.27	1250.57	1251.54
3.6	1299.45	1275	1315.85	1457.48	1166.74	1372.18
3.7	1354.71	1362.17	1307.54	1540.37	1287.89	1358.61
3.8	1384.74	1339.42	1343.5	1608.92	1281.84	1415.51
3.9	1422.52	1351.84	1359.65	1673.77	1321.73	1427.06
4	1468.75	1412.04	1364.77	1758.96	1392.95	1453.32
4.1	1470.26	1458.8	1441.47	1779.89	1444.51	1545.38
4.2	1602.4	1513.06	1416.09	1932.02	1530.59	1548.17
4.3	1579.42	1578.29	1403.36	1897.7	1601.1	1569.49
4.4	1574.79	1594.81	1427.63	1922.83	1619.2	1609.6
4.5	1632.04	1579.48	1453.54	2010.41	1648.39	1920.46
4.6	1653.83	1630.99	1563.98	2084	1642.32	1956.76
4.7	1680.27	1678.05	1583.17	2150.45	1730.01	1995.73
4.8	1780.43	1716.93	1604.25	2225.07	1765.81	2026.61
4.9	1759.06	1820.03	1611.61	2321.88	1918.18	2067.21
5	1815.7	1838.36	1692.2	2345.77	1998.33	2176.69
5.1	1903.26	1827.68	1699.2	2427.41	2059.94	2258.39
5.2	1949.28	1960.4	1731.81	2582.21	2071.22	2358.63
5.3	2013.11	1959.43	1843.8	2527.19	2181.58	2349.8
5.4	2004.61	2002.03	1872.13	2632.74	2265.9	2430.7
5.5	2050.23	2093.89	1943.27	2721.86	2297.45	2485.31
5.6	2128.17	2130.22	1967.59	2799.5	2400.12	2607.88
5.7	2178.74	2229.99	2029.41	2858.4	2427.8	2715.97
5.8	2220.54	2188.84	2063.05	2983.04	2523.08	2779.74
5.9	2363.09	2321.7	2102.79	3040.45	2580.35	2891.22
6	2376.71	2314.8	2182.17	3166.21	2587.49	2882.96
6.1	2447.81	2380.06	2165.34	3209.63	2753.73	2940.65
6.2	2484.69	2436.45	2251.02	3369.9	2767.86	3051.5
6.3	2498.36	2432.86	2267.35	3396.99	2892.71	3074.67
6.4	2522.76	2506.57	2275.96	3463.55	2901.23	3142.28
6.5	2548.84	2492.83	2391.12	3525.07	3031.32	3168.46
6.6	2580.52	2554.9	2383.7	3655.54	3097.94	3276.65
6.7	2712.6	2612.7	2481.76	3612.33	3125.18	3364.61
6.8	2644.93	2652.88	2491.5	3814.7	3186.48	3386.59
6.9	2795.37	2763.12	2500.3	3831.21	3187.87	3482.83
7	2823.16	2767.44	2547.82	3937.22	3326.66	3554.44
7.1	2848.24	2776.38	2619.39	3932.02	3487.41	3625.64
7.2	2836.06	2858.57	2634.07	4042.82	3465.57	3646.22
7.3	2909.81	2900.7	2716.31	4130.2	3603.5	3619.2
7.4	2965.52	2920.44	2812.21	4175.53	3644.31	3805.67
7.5	2976.53	2917.85	2820.48	4279.52	3709.88	3833.9
7.6	3093.96	3013.31	2816.19	4322.78	3731.64	3911.92
7.7	3064.22	3049.08	2796.65	4355.16	3713.89	3846.88
7.8	3142.34	3143	2856.48	4502.59	3735.42	3908.08
7.9	3179.79	3091.95	2882.17	4503.7	3881.75	4013.09
8	3164.1	3179.62	2896.58	4550.38	3949.9	4029.26
8.1	3157.27	3081.28	2968.13	4507.72	3981.56	4140.5
8.2	3186.66	3172.26	3002.39	4592.57	4085.09	4148.96
8.3	3225.61	3168.72	2982.26	4674.49	4142.17	4153.24
8.4	3265.67	3223.8	3057.09	4669.24	4238.98	4274.27
8.5	3302.93	3269.83	3028.84	4640.96	4273.03	4249.44
8.6	3420.71	3254.68	3010.19	4737.23	4213.18	4190.98
8.7	3315.67	3312.82	3084.25	4838.95	4218.24	4344.72
8.8	3393.8	3276.43	3054.5	4762.04	4279.52	4382.87
8.9	3426.1	3336.86	3145.77	4892.22	4393.69	4447.03
9	3339.55	3373.16	3087.21	4853.33	4464.82	4387.07
9.1	3429.4	3346.97	3160.8	4872.39	4470.64	4487.51
9.2	3441.71	3398.32	3142.29	4911.8	4435.8	4507.31
9.3	3442.6	3358.12	3198.73	4921.53	4529.49	4464.88
9.4	3409.93	3377.78	3219.62	4977.07	4544.97	4568.62
9.5	3452.39	3420.84	3190.28	4952.82	4438.67	4512.47
9.6	3488.4	3436.71	3175.91	5048.52	4560.26	4519.77
9.7	3455.29	3428.41	3265.59	5017.1	4708.54	4526.85
9.8	3517.52	3423.1	3291.3	5106.78	4565.48	4603.17
9.9	3575.91	3467.82	3264.91	5042.41	4642.15	4514.11
10	3515.27	3458.95	3257.76	5205.56	4640.93	4653.47
10.1	3554.48	3425.42	3201.32	5126.59	4648.44	4586.29
10.2	3475.22	3519.67	3257.12	5201.51	4710.36	4643.88
10.3	3545.12	3449.41	3234.83	5157.38	4717.01	4595.47
10.4	3575.38	3487.16	3258.87	5207.84	4759.91	4557.17
10.5	3579.64	3520.65	3289.21	5121.82	4772.76	4595.26
10.6	3577.98	3512.03	3245.09	5226.02	4670.4	4586.41
10.7	3609.87	3572.95	3337.53	5218.29	4808.74	4711.25
10.8	3605.44	3490.61	3337.87	5263.16	4848.56	4650.34
10.9	3628.25	3563.45	3280.45	5175.49	4674.3	4701.91
11	3611.14	3554.89	3253.88	5209.96	4649.2	4722.94
11.1	3583.55	3530.65	3257.53	5235.49	4747.2	4715.85
11.2	3641.09	3586.96	3303.31	5287	4727	4714.03
11.3	3560.43	3542.96	3329.88	5261.3	4863.76	4820.19
11.4	3559.85	3564.89	3255.79	5398.91	4938.7	4717.78
11.5	3713.88	3569.07	3293.09	5255.49	4941.12	4768.24
11.6	3622.45	3599.69	3310.39	5370.32	4864.04	4825.03
11.7	3639.15	3603.37	3347.61	5272.82	4855.47	4833.49
11.8	3674.92	3593	3303.01	5245.9	4892.64	4800.24
11.9	3681.62	3541.42	3333.33	5283.57	4971.15	4870.99
12	3698.41	3625.78	3269.8	5472.56	4867.19	4962.53
12.1	3766.88	3619.21	3368.58	5363.59	4969.19	4917.85
12.2	3653.14	3600.82	3288.35	5384	4909.9	4878.05
12.3	3669.95	3654.2	3323.25	5347.57	5013.11	4835.18
12.4	3698.73	3612.79	3372.67	5439.48	4990.67	4934.23
12.5	3692.61	3615.86	3325.63	5346.81	4947.29	4946.67
12.6	3682.85	3630.81	3374.8	5417.71	5075.41	5007.79
12.7	3732.66	3608.08	3391.1	5469.66	5047.89	4992.24
12.8	3687.7	3608.77	3323.05	5481.23	5033.41	4908.85
12.9	3731.9	3619.51	3373.95	5454.78	5128.2	5018.33
13	3683.82	3722.36	3382.48	5426.02	5122.95	4958.34
13.1	3706.35	3608.49	3367.18	5331.68	5036.96	5005.32
13.2	3771.02	3587.98	3350.54	5366.71	5079.58	4991.1
13.3	3655.44	3624.14	3357.16	5475.23	5115.02	5086.99
13.4	3623.43	3581.92	3398.97	5473.95	5094.13	5042.54
13.5	3684.71	3583.46	3436.85	5390.96	5111.96	4984.69
13.6	3651.67	3568.12	3367.55	5325.08	5208.82	5009.41
13.7	3596.84	3543.59	3393.24	5286.06	5056.55	4908.4
13.8	3625.33	3483.86	3366.79	5470.03	5085.89	4960.03
13.9	3579.34	3531.81	3323.83	5361.28	5086.45	4912.24
14	3586.53	3534.82	3403.42	5312.17	5108.66	4953.15
	#DIV/0!	#DIV/0!	#DIV/0!	#DIV/0!	#DIV/0!	#DIV/0!
